# Supplementary material for: Ischemic tolerance and cardiac repair in the spiny mouse (Acomys)
Source: PubMed Central journal article supplement (PMC8599451; doi:10.1038/s41536-021-00188-2), 2021-11-17
Supplement: 41536_2021_188_MOESM1_ESM.pdf [file 41536_2021_188_MOESM1_ESM.pdf]

Supplementary figure 1

a

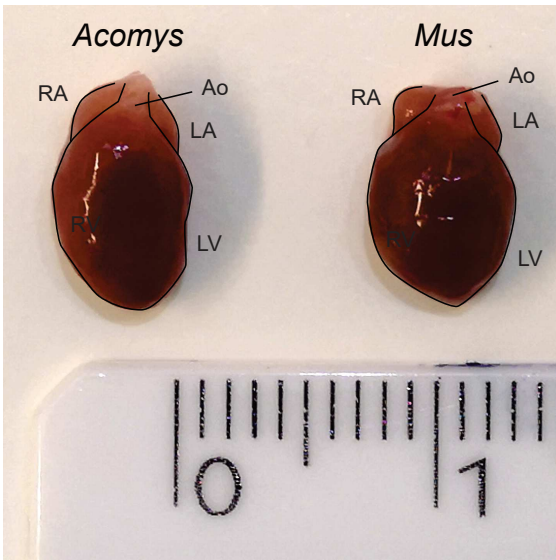

b

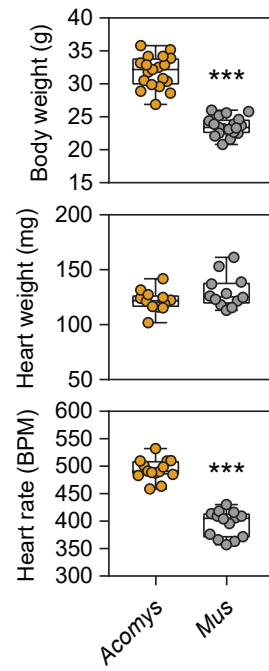

c

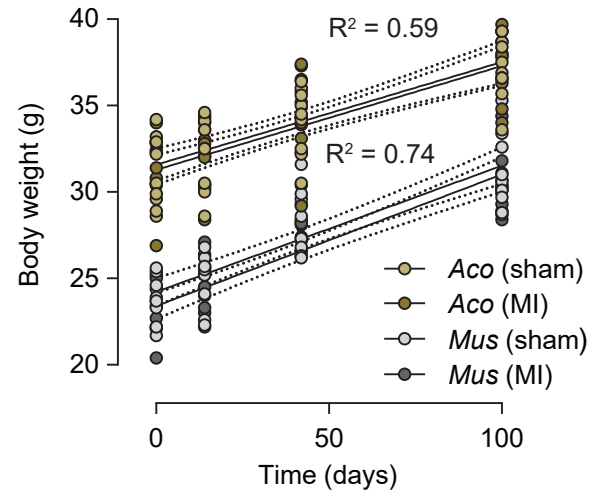

**Supplementary figure 1. Basic metrics underscore anatomical similarities of the heart. (a)**

Photograph of a healthy adult *Acomys* and *Mus* heart. RA (right atrium), LA (left atrium), RV (right ventricle), LV (left ventricle), Ao (aorta). Attached ruler displays metric centimeters. **(b)** Basic metrics comparison between *Acomys* and *Mus*. Unpaired t-test. **(c)** Body weight progression after sham- or MI-surgery. Solid line represents a fitted linear regression. Dashed lines mark the 95% confidence interval boundaries of the best-fit line. All graphs represent the mean  $\pm$  standard error of the mean (SEM).

# Supplementary figure 2

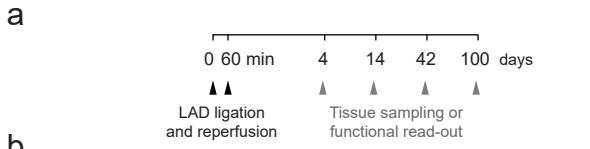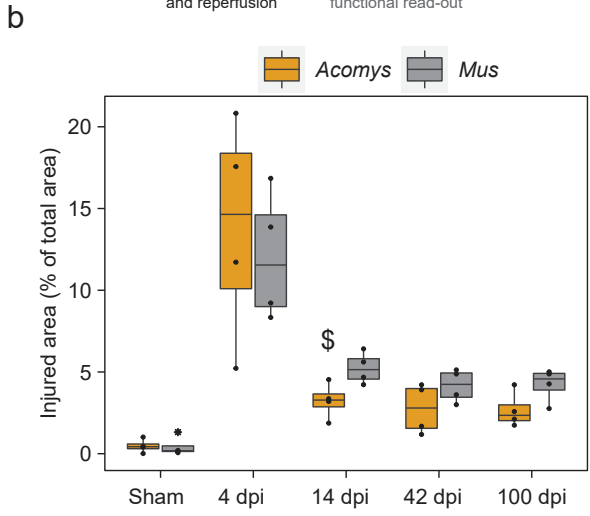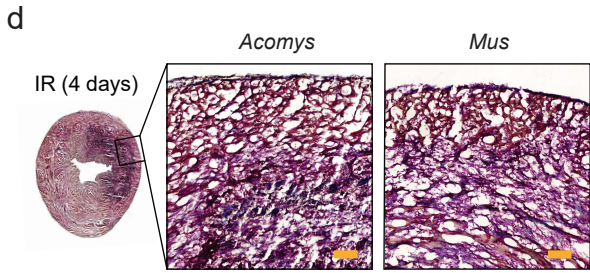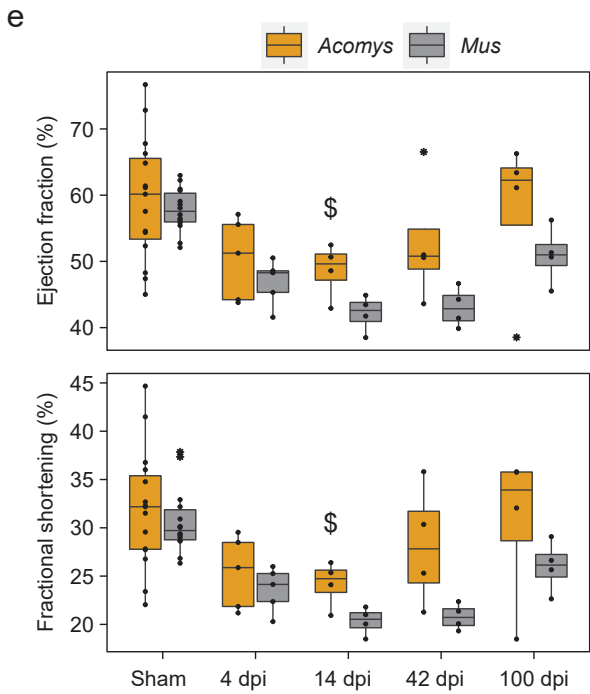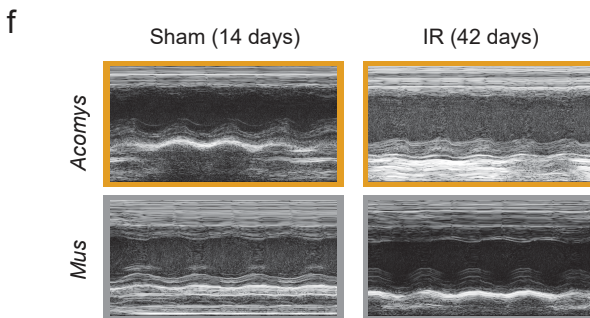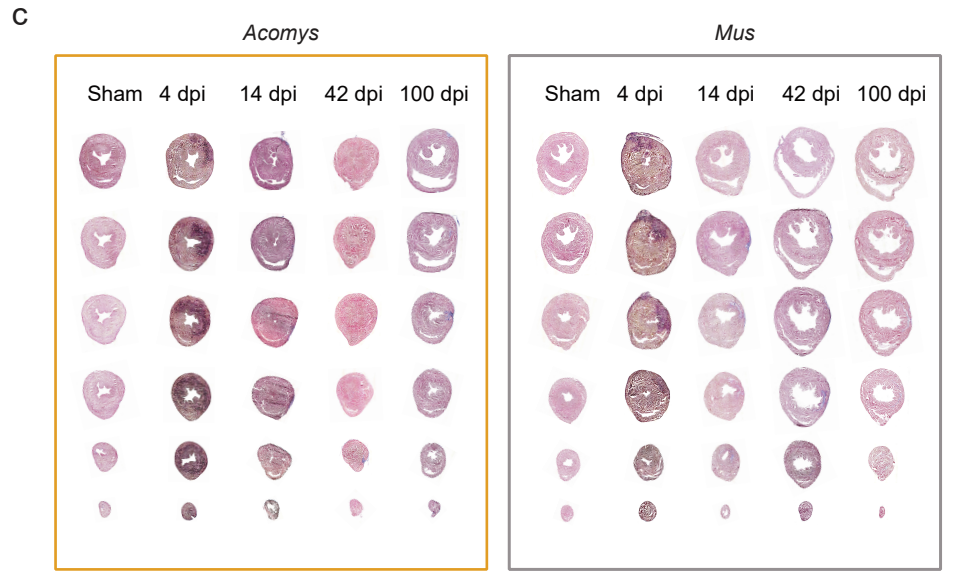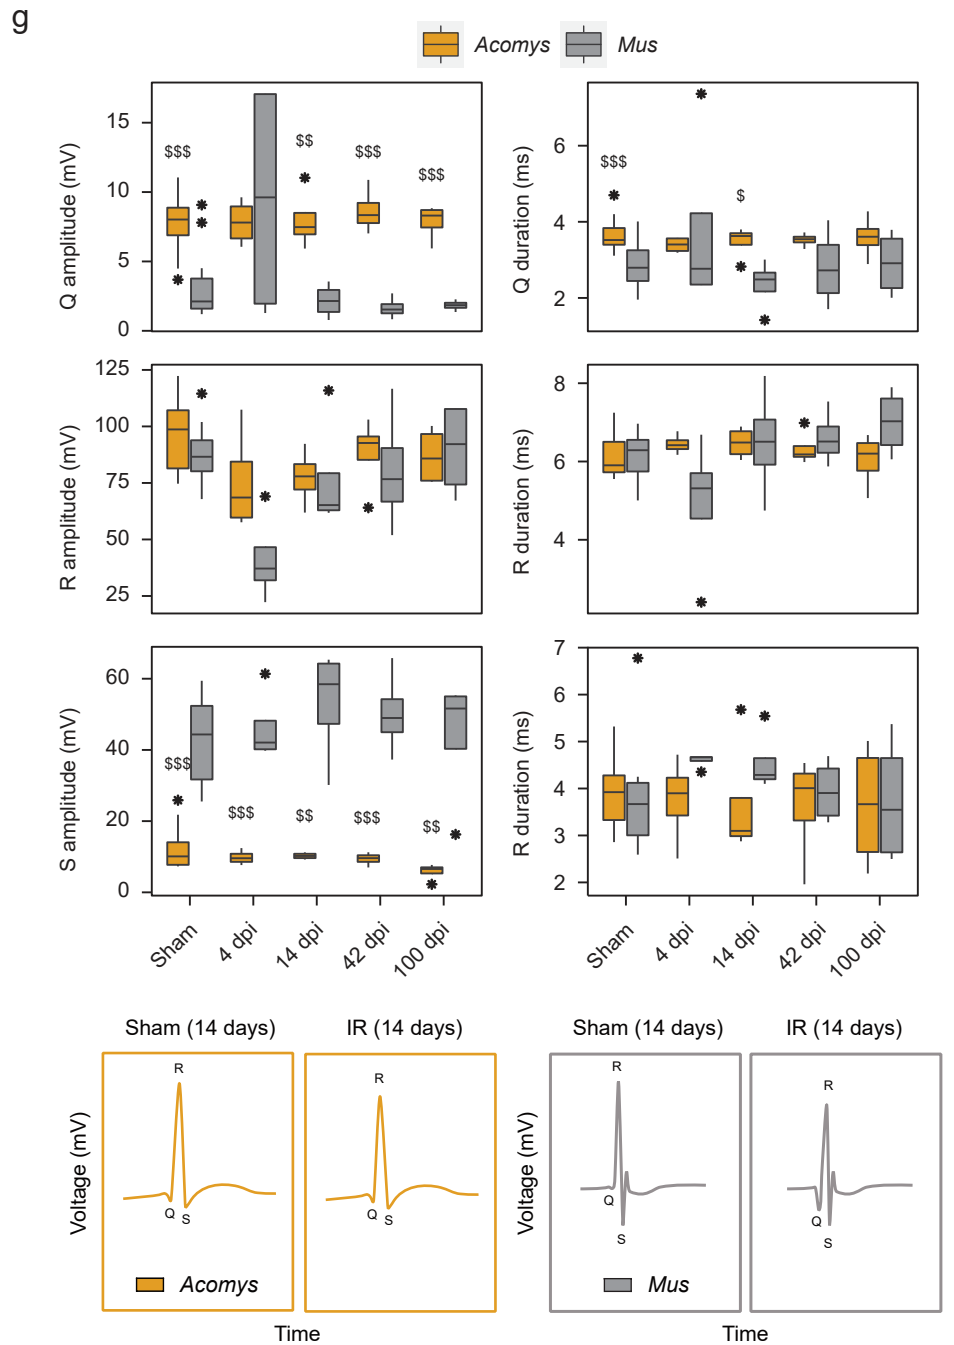

**Supplementary figure 2. Ischemic reperfusion in *Acomys* and *Mus*.** (a) Overview showing the different time points after reperfusion surgery, used for functional measurements or tissue sampling. (b) Injured area (% of total area) development over time, based on transversal stacks stained with Masson's Trichrome (see 'Methods'). (c) Representative images from (b), showing transversal progression from point of ligation down to the apex. (d) Representative close-up images of a Masson's Trichrome stain showing the injured area at 4 days post-IR. Scale bar = 100  $\mu\text{m}$ . (e) Echocardiographic quantification of cardiac output after temporary ligation of the LAD for 60 min (reperfusion injury) or sham-control, including ejection fraction (volumetric percentage of fluid ejected from the chamber with each contraction), and fractional shortening (percentage of diastolic dimension that is lost in systole). Graph contains animals that were only measured at one time point (unpaired samples), and some that were measured over different time points (paired samples). (f) Corresponding representative images of the M-mode recording shown in (e). (g) Electrocardiogram quantification (see 'Methods') showing QRS wave parameters (amplitude and duration) after IR or sham-control, with corresponding representative illustration of the QRS wave. Graph contains animals that were measured over different time points (paired samples), as well as animals that were only measured at one time point (unpaired samples). n = (from left to right) 15, 5, 4, 4, 4, 14, 5, 4, 4, 4. b, e, g: Two-way mixed ANOVA followed by Bonferroni post hoc test. For all comparisons: \* is significant compared to *Acomys*-sham, # compared to *Mus*-sham, \$ is significant in an inter-species comparison of the same time point (e.g. 100 days to 100 days). \* is  $p < 0.05$ , \*\* is  $p < 0.01$ , and \*\*\* is  $p < 0.001$ . Box plots represent the median, interquartile range (IQR), minimum (25<sup>th</sup> percentile – 1.5 \* IQR), and maximum (75<sup>th</sup> percentile – 1.5 \* IQR).

### Supplementary figure 3

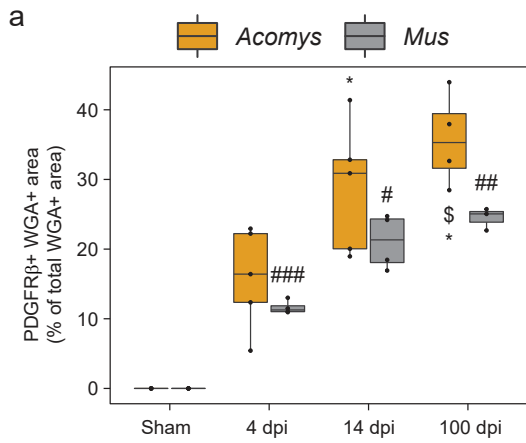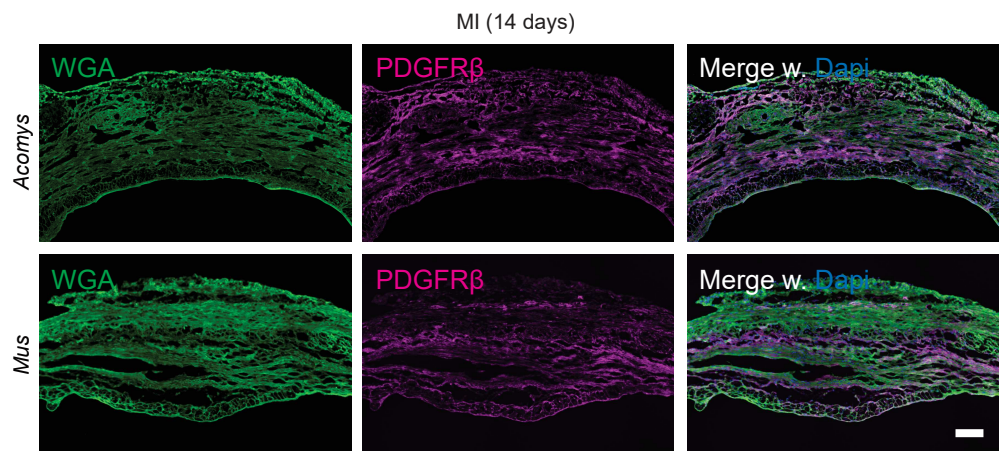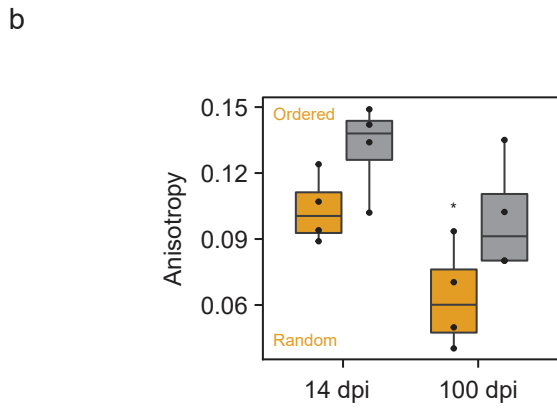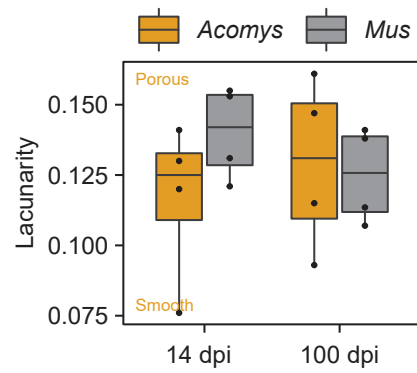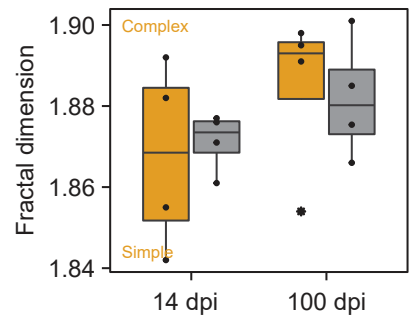

**Supplementary figure 3. Scar organization in *Acomys* and *Mus* after cardiac injury.** (a) Relative fibroblast coverage in the scar of infarcted hearts, marked by the pan-fibroblast marker PDGFR $\beta$ . Scale bar = 200  $\mu$ m. Two-way mixed ANOVA followed by Bonferroni post hoc test. \* is significant compared to *Acomys*-sham, # compared to *Mus*-sham, \$ is significant in an inter-species comparison of the same time point (e.g. 100 days to 100 days). \* is  $p < 0.05$ , \*\* is  $p < 0.01$ , and \*\*\* is  $p < 0.001$ .

(b) Extracellular matrix parameters (anisotropy, lacunarity, fractal dimension), quantified from Figure 4d. Box plots represent the median, interquartile range (IQR), minimum (25<sup>th</sup> percentile – 1.5 \* IQR), and maximum (75<sup>th</sup> percentile + 1.5 \* IQR).

### Supplementary figure 4

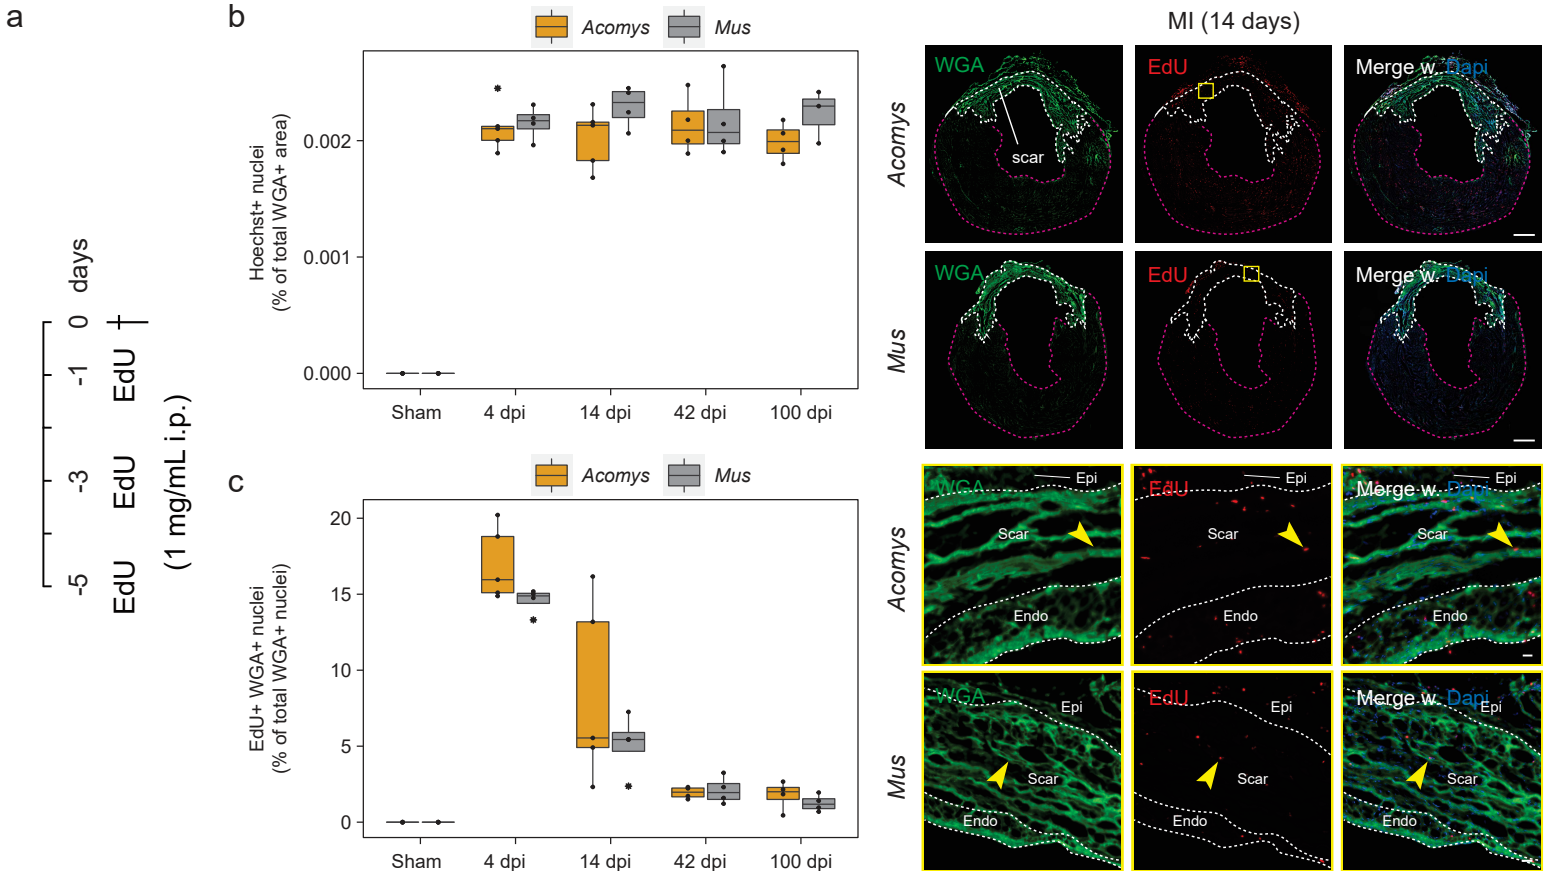

**Supplementary figure 4. Proliferation dynamics in the heart.** (a) Overview of the EdU injection strategy. (b) Cellularity of the scar, quantified using Hoechst. (c) Global proliferation dynamics in the scar, marked by EdU+ cells (yellow arrows). Scale bar = 700  $\mu\text{m}$  (overview) or 30  $\mu\text{m}$  (inlet). Epi = epicardium, Endo = endocardium. b, c: Two-way mixed ANOVA followed by Bonferroni post hoc test. For all comparisons: \* is significant compared to *Acomys*-sham, # compared to *Mus*-sham, \$ is significant in an inter-species comparison of the same time point (e.g. 100 days to 100 days). \* is  $p < 0.05$ , \*\* is  $p < 0.01$ , and \*\*\* is  $p < 0.001$ . Box plots represent the median, interquartile range (IQR), minimum (25<sup>th</sup> percentile – 1.5 \* IQR), and maximum (75<sup>th</sup> percentile – 1.5 \* IQR).



Supplementary figure 5

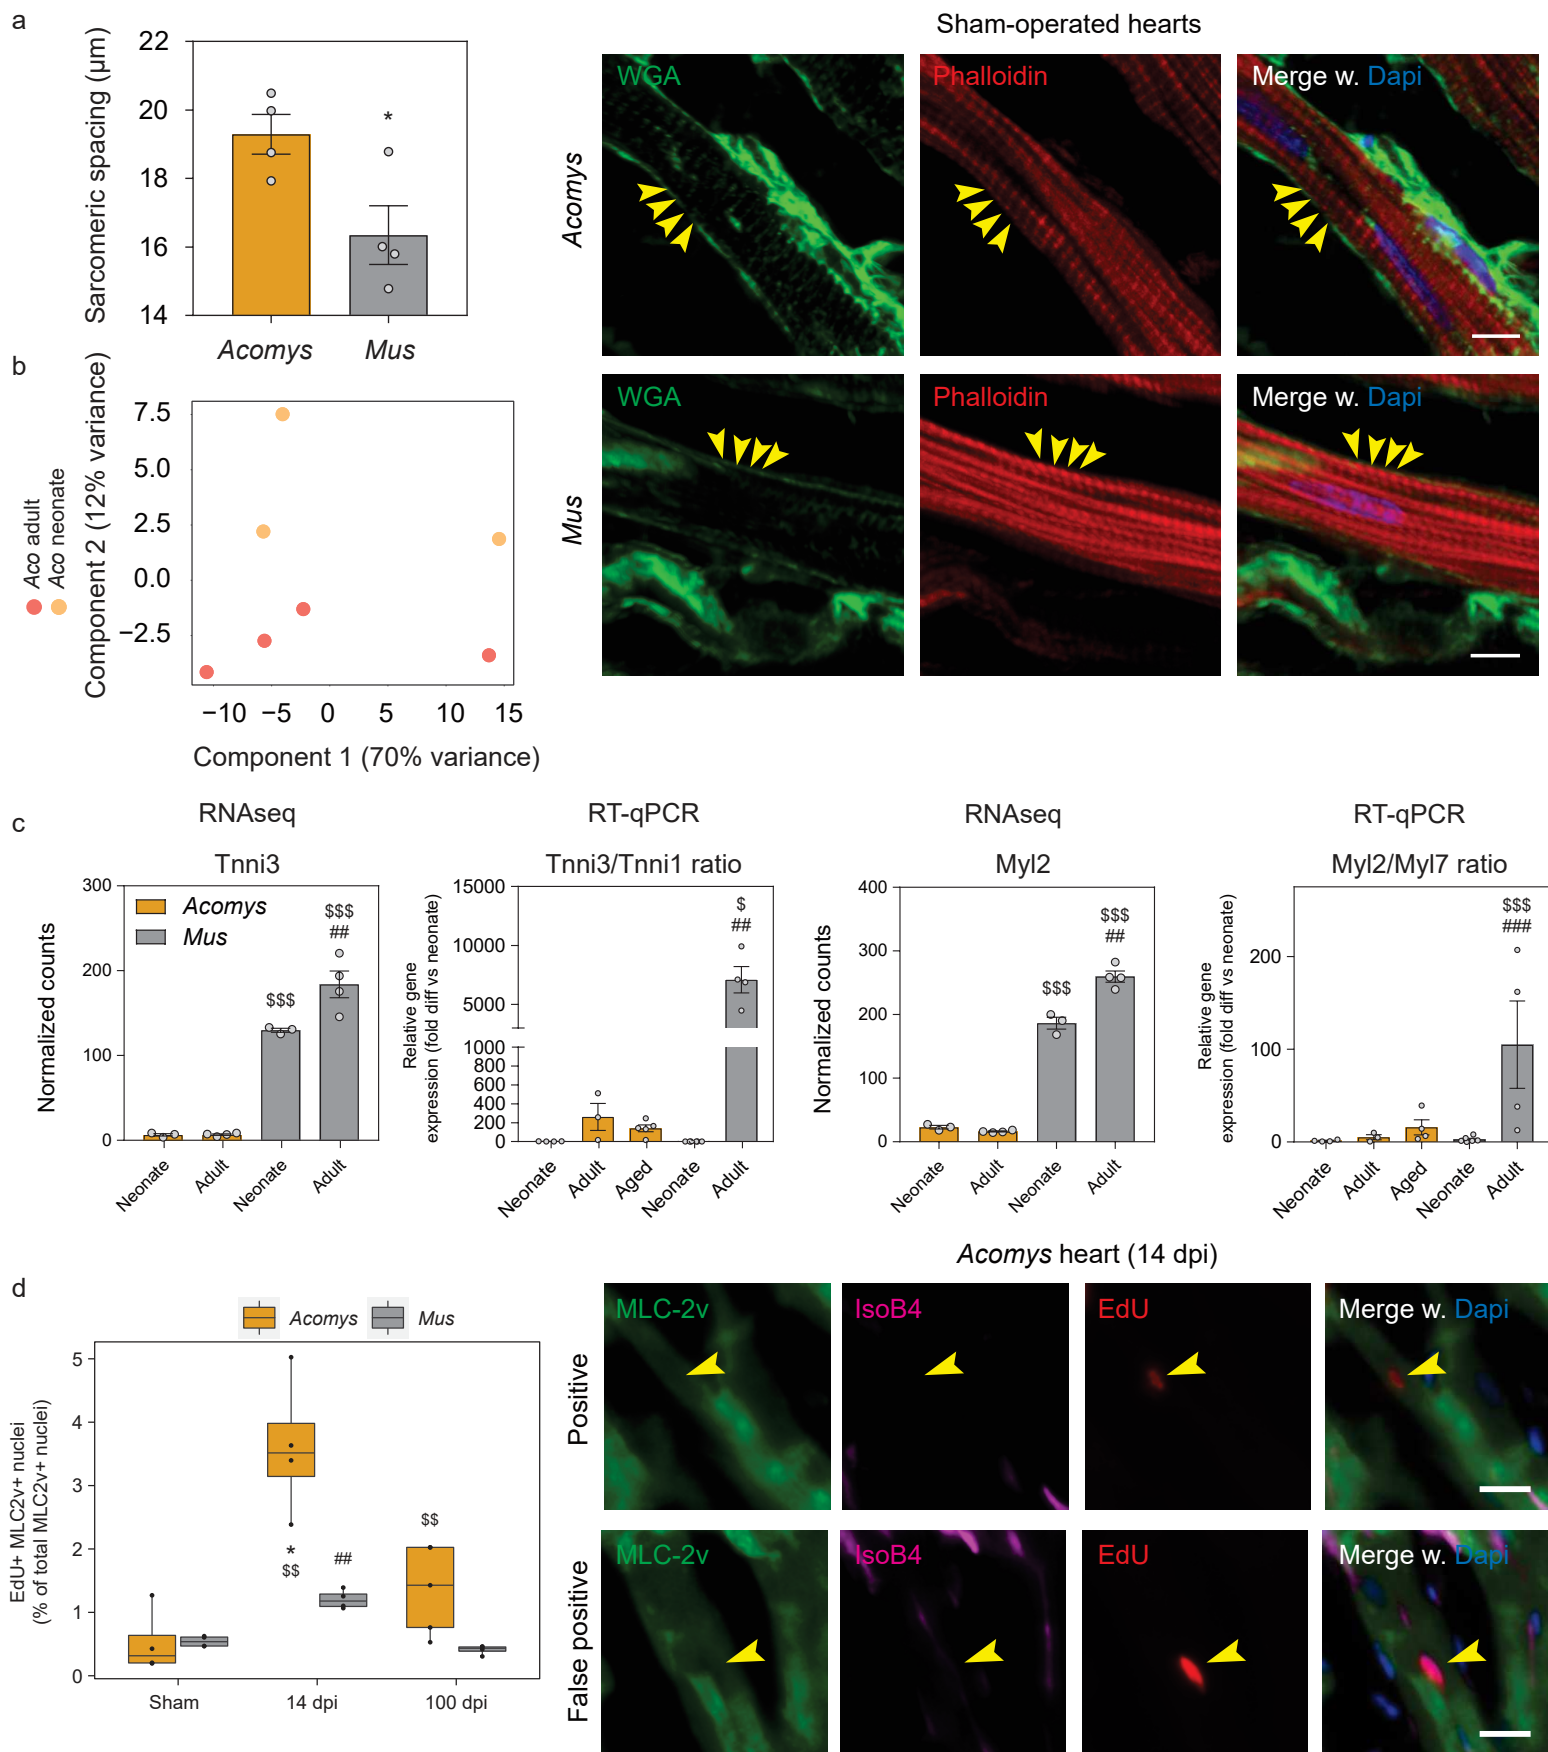

**Supplementary figure 5. Cardiomyocyte properties in *Acomys* and *Mus* hearts.** (a) Distance between sarcomeres (yellow arrows) of healthy adult hearts, measured using a Phalloidin dye stain. Scale bar = 5  $\mu\text{m}$ . (b) Sample-to-sample distance visualization through principal component analysis (PCA). (c) Normalized counts from RNAseq data and accompanying relative gene expression from whole heart ventricle homogenates subjected to RT-qPCR. Samples have been normalized to the sham-control (*Acomys* or *Mus*). (d) CM (marked by MLC-2v) proliferation that are isolectin B4 negative (to exclude capillaries) in heart ventricles, indicated by EdU. Panels at the right side indicate representative fluorescent antibody or dye images showing proliferating (positive and false positive) CMs (yellow arrows). Scale bar = 15  $\mu\text{m}$ . c, d: Two-way mixed ANOVA followed by Bonferroni post hoc test. For all comparisons: \* is significant compared to *Acomys*-sham, # compared to *Mus*-sham, \$ is significant in an inter-species comparison of the same time point (e.g. 100 days to 100 days). \* is  $p < 0.05$ , \*\* is  $p < 0.01$ , and \*\*\* is  $p < 0.001$ . Box plots represent the median, interquartile range (IQR), minimum (25<sup>th</sup> percentile – 1.5 \* IQR), and maximum (75<sup>th</sup> percentile – 1.5 \* IQR). All bar graphs represent the mean  $\pm$  standard error of the mean (SEM).

Supplementary figure 6

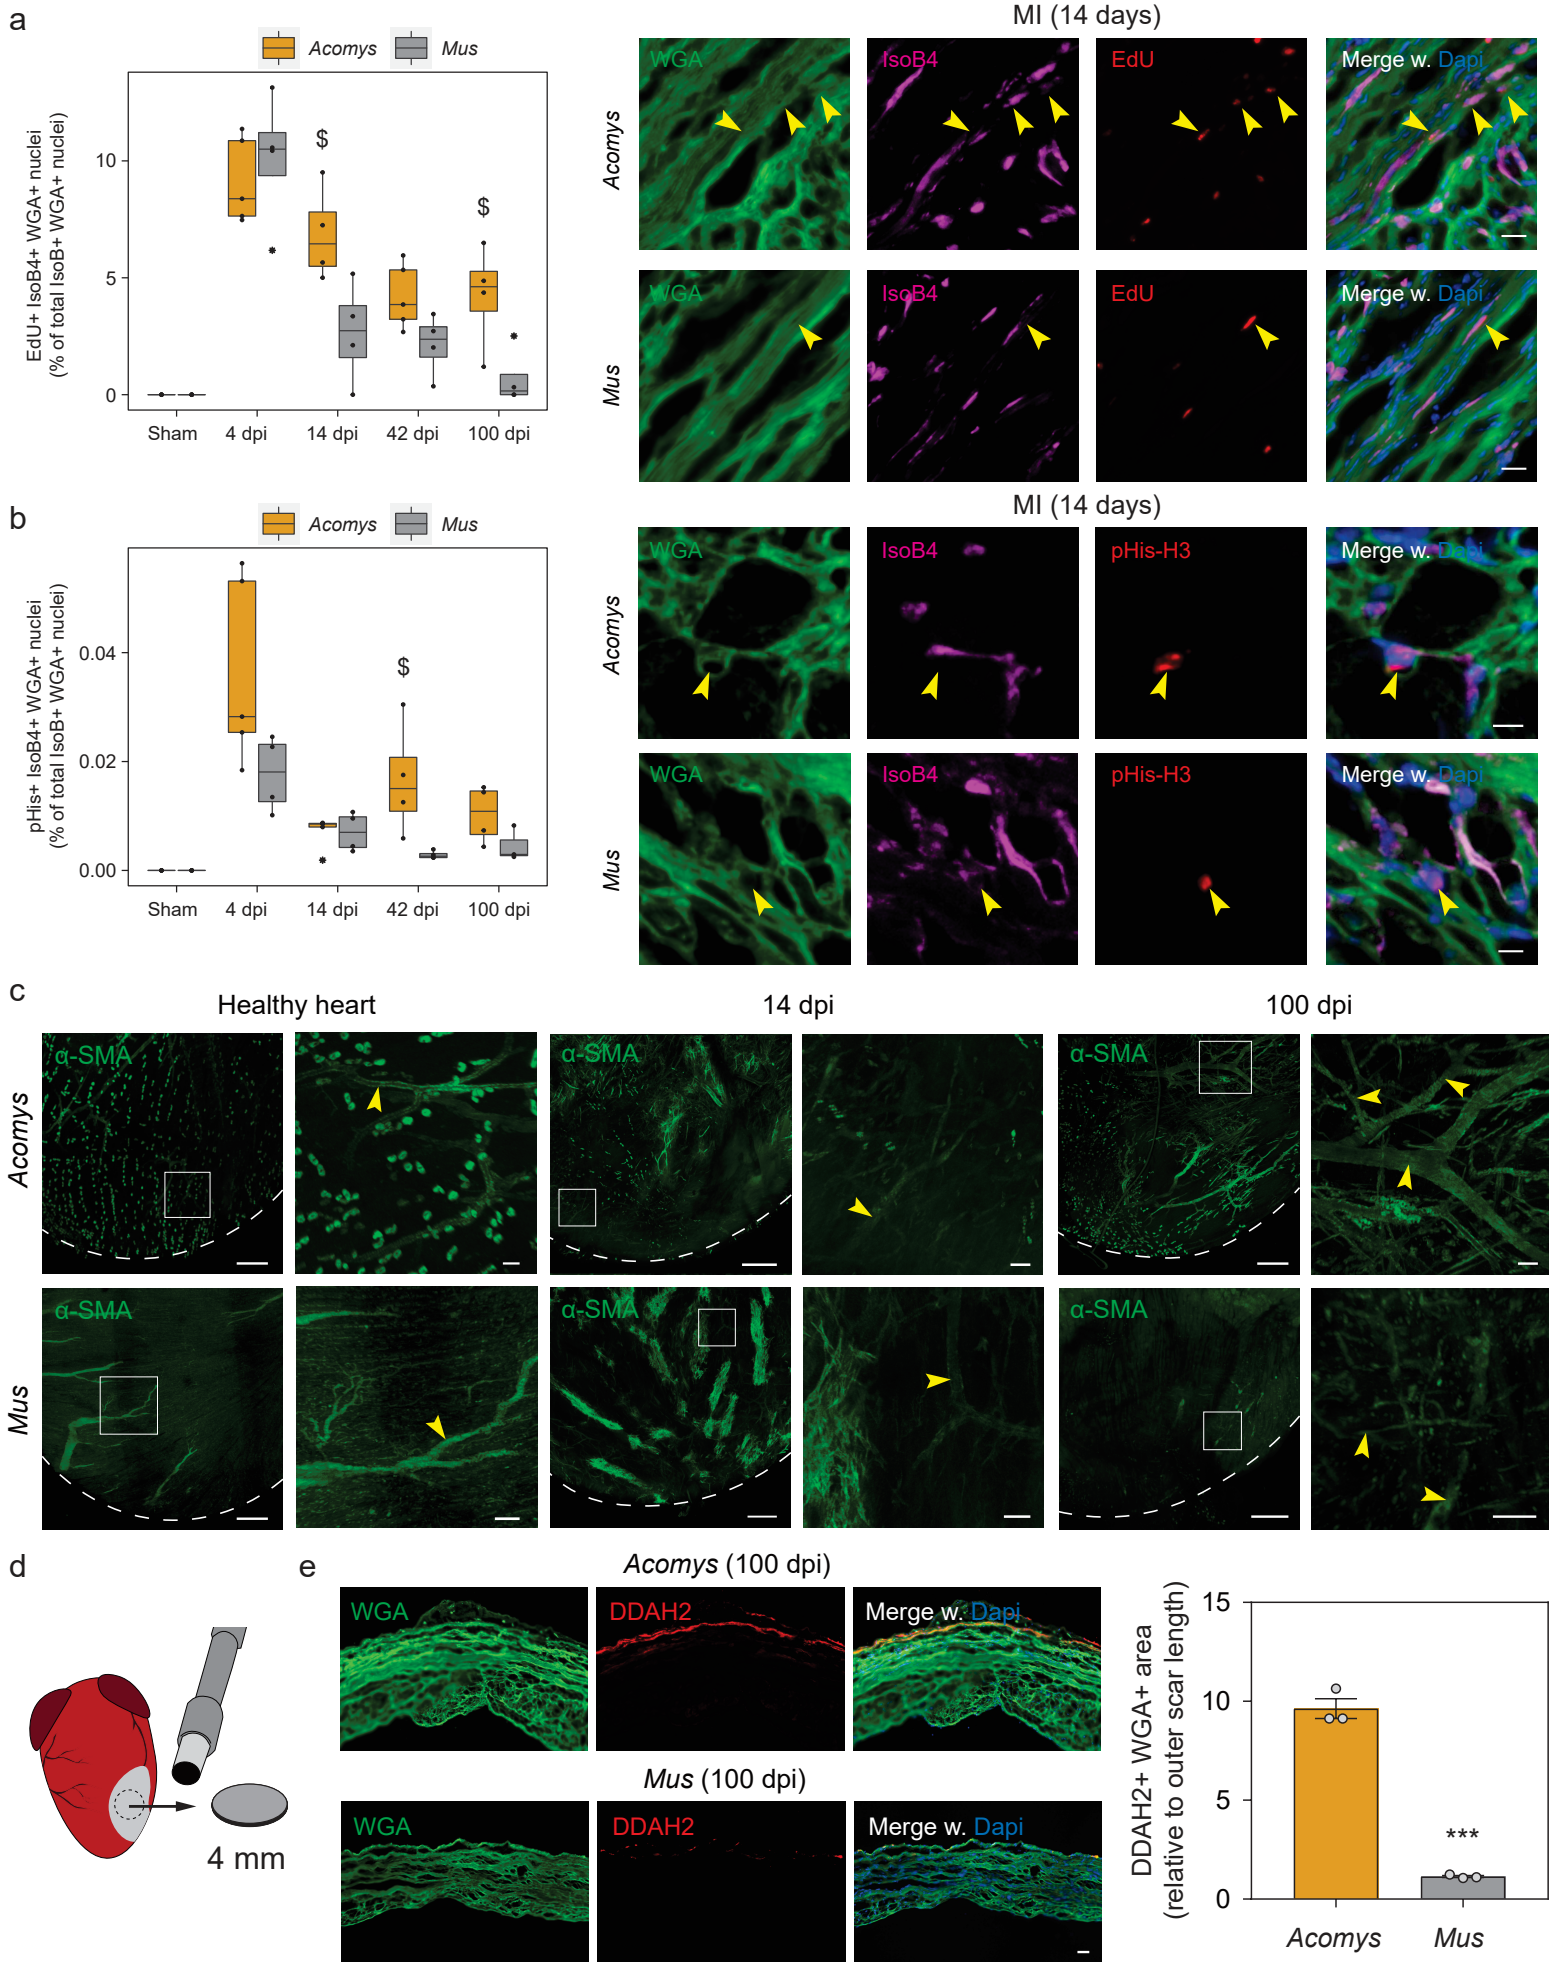

**Supplementary figure 6. Angiogenesis in infarcted *Acomys* hearts.** **(a)** Capillary (marked by isolectin B4, yellow arrows) proliferation in the scar area of infarcted hearts, indicated by EdU labeling. Scale bar = 20  $\mu\text{m}$ . **(b)** Capillary (marked by isolectin B4, yellow arrows) proliferation in the scar area of infarcted hearts, indicated by phosphorylated Histone H3 (ser 28) labeling. Scale bar = 10  $\mu\text{m}$ . **(c)** Whole mount confocal images showing  $\alpha$ -SMA+ vessels inside the healthy heart or scar area of 14/100 day old infarcted hearts. Yellow arrows point towards vessels. Scale bar = 300  $\mu\text{m}$  (overview) or 50  $\mu\text{m}$  (inlet). Experiment was repeated two times per condition. **(d)** Schematic of how imaged tissues in (c) were obtained. **(e)** Epicardial immunofluorescence staining of the scar area of infarcted hearts, marked by DDAH2 labeling. Unpaired t-test. Scale bar = 40  $\mu\text{m}$ . a, b: Two-way mixed ANOVA followed by Bonferroni post hoc test. For all comparisons: \* is significant compared to *Acomys*-sham, # compared to *Mus*-sham, \$ is significant in an inter-species comparison of the same time point (e.g. 100 days to 100 days). \* is  $p < 0.05$ , \*\* is  $p < 0.01$ , and \*\*\* is  $p < 0.001$ . Box plots represent the median, interquartile range (IQR), minimum (25<sup>th</sup> percentile – 1.5 \* IQR), and maximum (75<sup>th</sup> percentile – 1.5 \* IQR). All bar graphs represent the mean  $\pm$  standard error of the mean (SEM).

# Supplementary figure 7

a

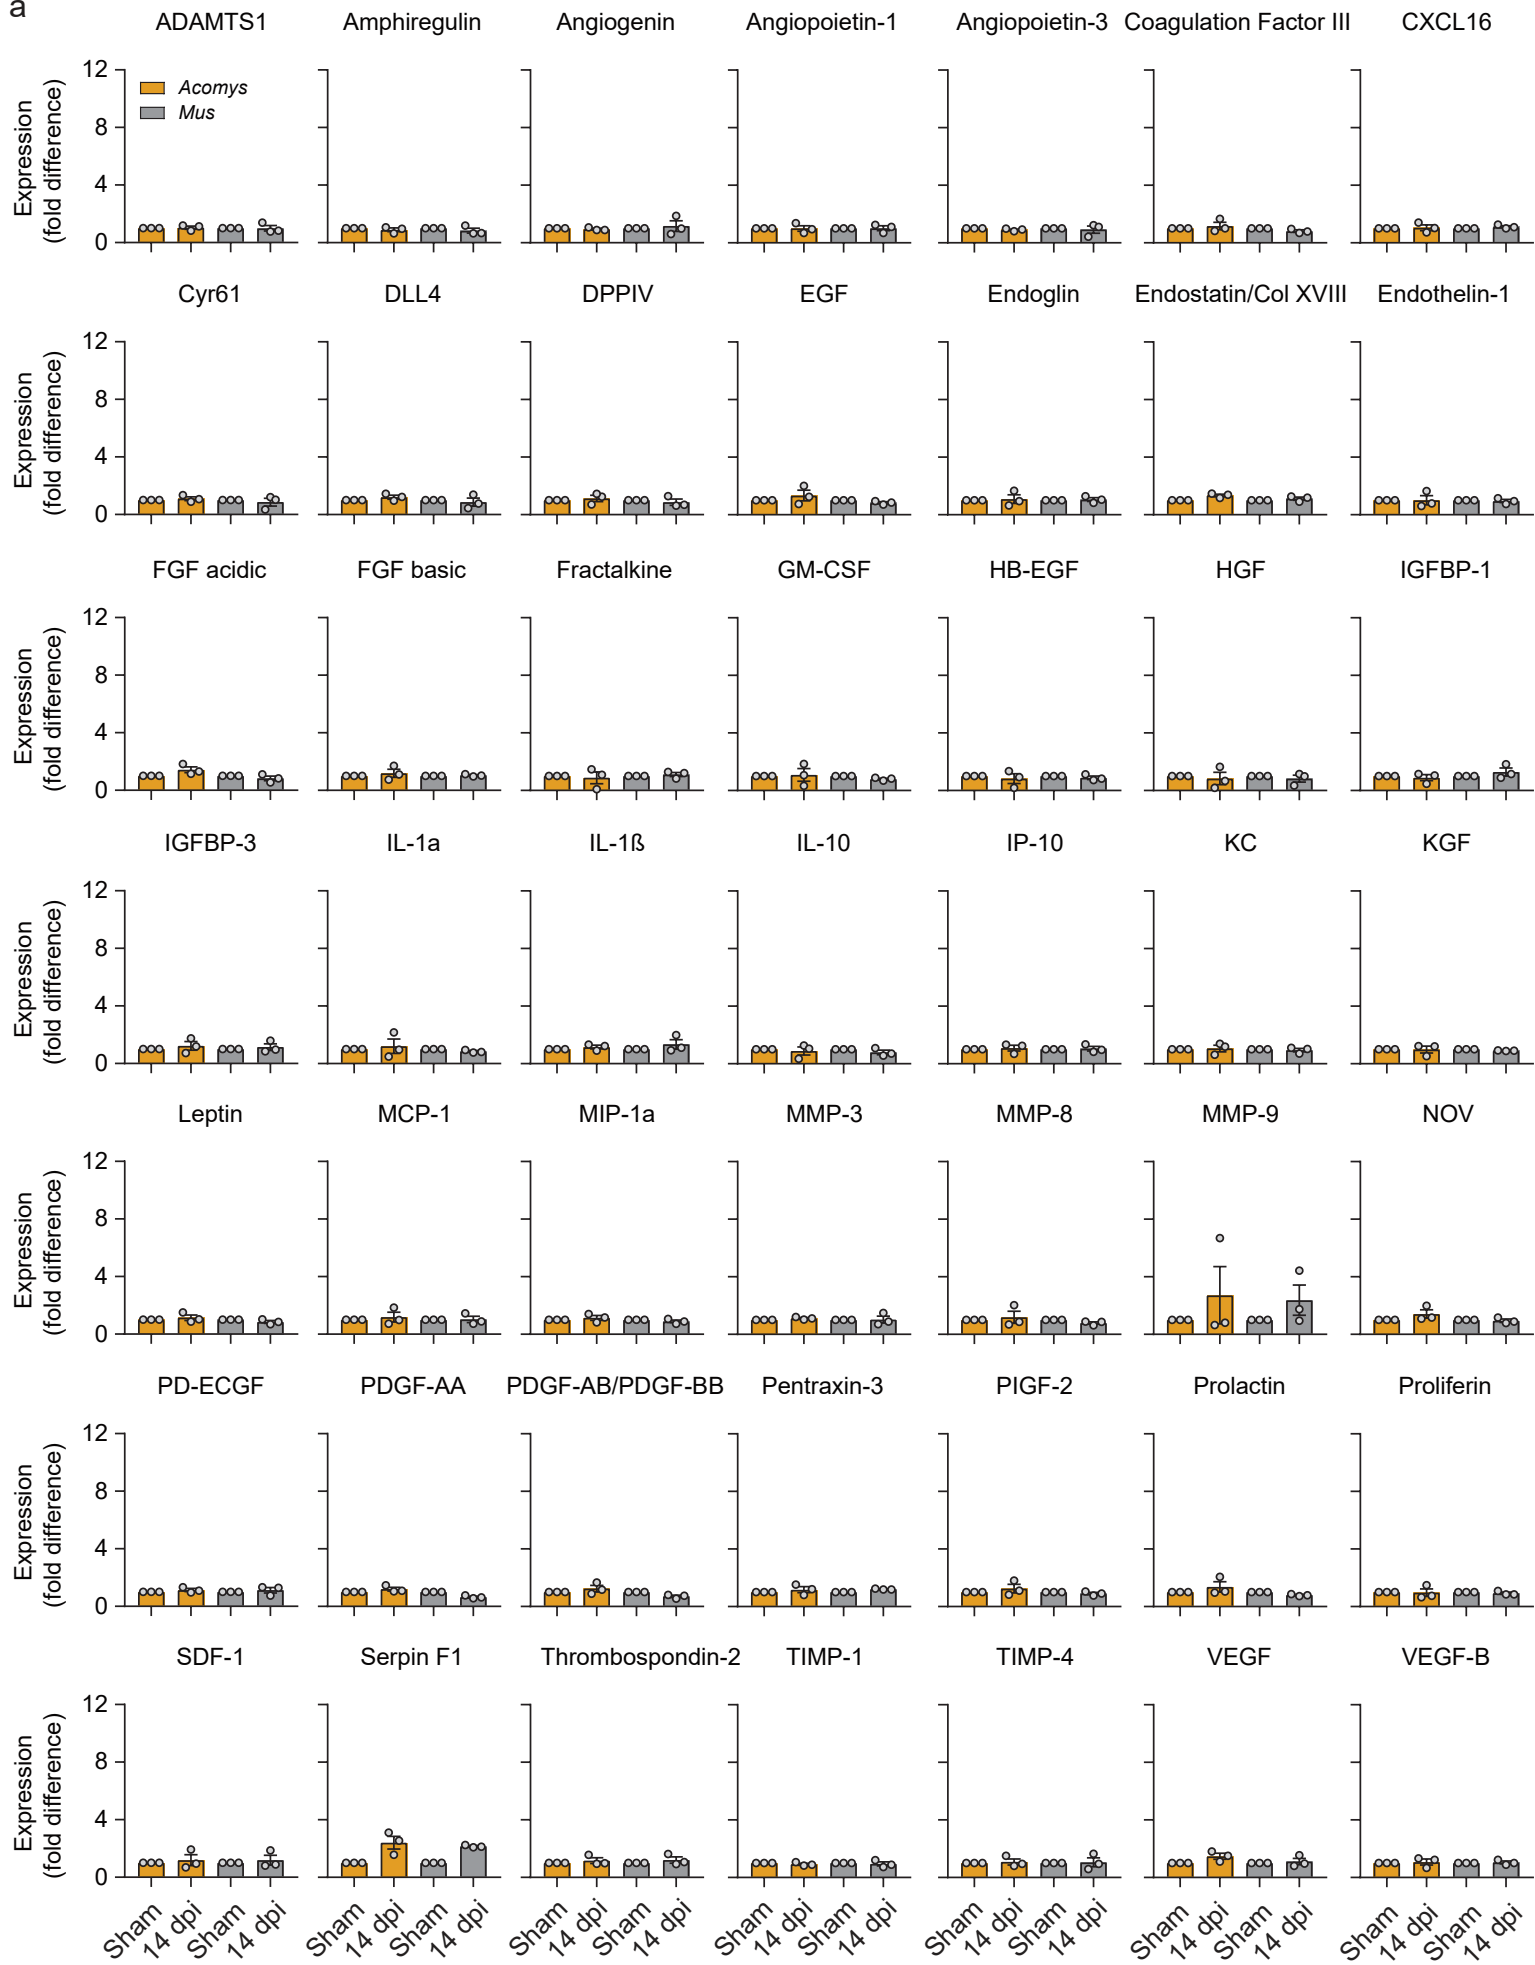

**Supplementary figure 7. Proteomic profiling of infarcted hearts. (a)** Remaining graphs not shown in Fig. 3d. Proteomic profiling of angiogenic proteins, obtained from whole heart ventricle homogenates (14 day post-MI and 14 day sham-controls). Samples are normalized to the sham-control (*Acomys* or *Mus*). All bar graphs represent the mean  $\pm$  standard error of the mean (SEM).

**Supplementary table 1**

**Figure 1e (Scar area)**

Two-way mixed ANOVA result

|   | <b>Effect</b> | <b>DFn</b> | <b>DFd</b> | <b>F</b> | <b>p</b> | <b>p&lt;.05</b> | <b>ges</b> |
|---|---------------|------------|------------|----------|----------|-----------------|------------|
| 1 | group         | 1          | 6          | 29.584   | 0.002    | *               | 0.407      |
| 2 | time          | 4          | 24         | 20.465   | 1.90E-07 | *               | 0.746      |
| 3 | group:time    | 4          | 24         | 4.969    | 0.005    | *               | 0.416      |

Simple pairwise comparison (between groups)

|   | <b>time</b> | <b>.y.</b> | <b>group1</b> | <b>group2</b> | <b>n1</b> | <b>n2</b> | <b>p</b> | <b>p.signif</b> | <b>p.adj</b> | <b>p.adj.signif</b> |
|---|-------------|------------|---------------|---------------|-----------|-----------|----------|-----------------|--------------|---------------------|
| 1 | control     | score      | Acomys        | Mus           | 8         | 4         | 0.927    | ns              | 0.927        | ns                  |
| 2 | dpi.004     | score      | Acomys        | Mus           | 8         | 4         | 0.602    | ns              | 0.602        | ns                  |
| 3 | dpi.014     | score      | Acomys        | Mus           | 8         | 4         | 0.195    | ns              | 0.195        | ns                  |
| 4 | dpi.042     | score      | Acomys        | Mus           | 8         | 4         | 0.074    | ns              | 0.074        | ns                  |
| 5 | dpi.100     | score      | Acomys        | Mus           | 8         | 4         | 0.00189  | **              | 0.00189      | **                  |

Simple pairwise comparison (within groups)

|    | <b>group</b> | <b>.y.</b> | <b>group1</b> | <b>group2</b> | <b>n1</b> | <b>n2</b> | <b>p.adj</b> | <b>p.adj.signif</b> |
|----|--------------|------------|---------------|---------------|-----------|-----------|--------------|---------------------|
| 1  | Acomys       | score      | control       | dpi.004       | 8         | 8         | 0.152        | ns                  |
| 2  | Acomys       | score      | control       | dpi.014       | 8         | 8         | 0.012        | *                   |
| 3  | Acomys       | score      | control       | dpi.042       | 8         | 8         | 0.478        | ns                  |
| 4  | Acomys       | score      | control       | dpi.100       | 8         | 8         | 0.52         | ns                  |
| 5  | Acomys       | score      | dpi.004       | dpi.014       | 8         | 8         | 0.524        | ns                  |
| 6  | Acomys       | score      | dpi.004       | dpi.042       | 8         | 8         | 0.28         | ns                  |
| 7  | Acomys       | score      | dpi.004       | dpi.100       | 8         | 8         | 1            | ns                  |
| 8  | Acomys       | score      | dpi.014       | dpi.042       | 8         | 8         | 1            | ns                  |
| 9  | Acomys       | score      | dpi.014       | dpi.100       | 8         | 8         | 1            | ns                  |
| 10 | Acomys       | score      | dpi.042       | dpi.100       | 8         | 8         | 1            | ns                  |
| 11 | Mus          | score      | control       | dpi.004       | 4         | 4         | 0.006        | **                  |
| 12 | Mus          | score      | control       | dpi.014       | 4         | 4         | 0.058        | ns                  |
| 13 | Mus          | score      | control       | dpi.042       | 4         | 4         | 0.202        | ns                  |
| 14 | Mus          | score      | control       | dpi.100       | 4         | 4         | 0.037        | *                   |
| 15 | Mus          | score      | dpi.004       | dpi.014       | 4         | 4         | 0.108        | ns                  |
| 16 | Mus          | score      | dpi.004       | dpi.042       | 4         | 4         | 1            | ns                  |
| 17 | Mus          | score      | dpi.004       | dpi.100       | 4         | 4         | 1            | ns                  |
| 18 | Mus          | score      | dpi.014       | dpi.042       | 4         | 4         | 1            | ns                  |
| 19 | Mus          | score      | dpi.014       | dpi.100       | 4         | 4         | 0.461        | ns                  |
| 20 | Mus          | score      | dpi.042       | dpi.100       | 4         | 4         | 0.122        | ns                  |

**Figure 1f (Ejection fraction)**

Two-way mixed ANOVA result

|   | <b>Effect</b> | <b>DFn</b> | <b>DFd</b> | <b>F</b> | <b>p</b> | <b>p&lt;.05</b> | <b>ges</b> |
|---|---------------|------------|------------|----------|----------|-----------------|------------|
| 1 | group         | 1          | 27         | 305.914  | 2.96E-16 | *               | 0.526      |
| 2 | time          | 4          | 108        | 68.446   | 9.68E-29 | *               | 0.696      |
| 3 | group:time    | 4          | 108        | 13.981   | 3.18E-09 | *               | 0.318      |

Simple pairwise comparison (between groups)

|   | <b>time</b> | <b>.y.</b> | <b>group1</b> | <b>group2</b> | <b>n1</b> | <b>n2</b> | <b>p</b> | <b>p.signif</b> | <b>p.adj</b> | <b>p.adj.signif</b> |
|---|-------------|------------|---------------|---------------|-----------|-----------|----------|-----------------|--------------|---------------------|
| 1 | control     | score      | Acomys        | Mus           | 15        | 14        | 0.541    | ns              | 0.541        | ns                  |
| 2 | dpi.004     | score      | Acomys        | Mus           | 15        | 14        | 0.00772  | **              | 0.00772      | **                  |
| 3 | dpi.014     | score      | Acomys        | Mus           | 15        | 14        | 1.31E-05 | ****            | 1.31E-05     | ****                |
| 4 | dpi.042     | score      | Acomys        | Mus           | 15        | 14        | 3.33E-10 | ****            | 3.33E-10     | ****                |
| 5 | dpi.100     | score      | Acomys        | Mus           | 15        | 14        | 8.24E-11 | ****            | 8.24E-11     | ****                |

Simple pairwise comparison (within groups)

|    | <b>group</b> | <b>.y.</b> | <b>group1</b> | <b>group2</b> | <b>n1</b> | <b>n2</b> | <b>p.adj</b> | <b>p.adj.signif</b> |
|----|--------------|------------|---------------|---------------|-----------|-----------|--------------|---------------------|
| 1  | Acomys       | score      | control       | dpi.004       | 15        | 15        | 0.002        | **                  |
| 2  | Acomys       | score      | control       | dpi.014       | 15        | 15        | 0.00027      | ***                 |
| 3  | Acomys       | score      | control       | dpi.042       | 15        | 15        | 0.00036      | ***                 |
| 4  | Acomys       | score      | control       | dpi.100       | 15        | 15        | 0.022        | *                   |
| 5  | Acomys       | score      | dpi.004       | dpi.014       | 15        | 15        | 1            | ns                  |
| 6  | Acomys       | score      | dpi.004       | dpi.042       | 15        | 15        | 1            | ns                  |
| 7  | Acomys       | score      | dpi.004       | dpi.100       | 15        | 15        | 0.319        | ns                  |
| 8  | Acomys       | score      | dpi.014       | dpi.042       | 15        | 15        | 1            | ns                  |
| 9  | Acomys       | score      | dpi.014       | dpi.100       | 15        | 15        | 0.071        | ns                  |
| 10 | Acomys       | score      | dpi.042       | dpi.100       | 15        | 15        | 1            | ns                  |
| 11 | Mus          | score      | control       | dpi.004       | 14        | 14        | 4.88E-09     | ****                |
| 12 | Mus          | score      | control       | dpi.014       | 14        | 14        | 2.94E-09     | ****                |
| 13 | Mus          | score      | control       | dpi.042       | 14        | 14        | 8.42E-09     | ****                |
| 14 | Mus          | score      | control       | dpi.100       | 14        | 14        | 7.60E-10     | ****                |
| 15 | Mus          | score      | dpi.004       | dpi.014       | 14        | 14        | 1            | ns                  |
| 16 | Mus          | score      | dpi.004       | dpi.042       | 14        | 14        | 0.07         | ns                  |
| 17 | Mus          | score      | dpi.004       | dpi.100       | 14        | 14        | 0.009        | **                  |
| 18 | Mus          | score      | dpi.014       | dpi.042       | 14        | 14        | 0.088        | ns                  |
| 19 | Mus          | score      | dpi.014       | dpi.100       | 14        | 14        | 0.044        | *                   |
| 20 | Mus          | score      | dpi.042       | dpi.100       | 14        | 14        | 1            | ns                  |



**Figure 1f (Fractional shortening)**

Two-way mixed ANOVA result

|   | <b>Effect</b> | <b>DFn</b> | <b>DFd</b> | <b>F</b> | <b>p</b> | <b>p&lt;.05</b> | <b>ges</b> |
|---|---------------|------------|------------|----------|----------|-----------------|------------|
| 1 | group         | 1          | 27         | 178.382  | 2.06E-13 | *               | 0.493      |
| 2 | time          | 4          | 108        | 75.243   | 2.42E-30 | *               | 0.704      |
| 3 | group:time    | 4          | 108        | 11.094   | 1.41E-07 | *               | 0.26       |

Simple pairwise comparison (between groups)

|   | <b>time</b> | <b>.y.</b> | <b>group1</b> | <b>group2</b> | <b>n1</b> | <b>n2</b> | <b>p</b> | <b>p.signif</b> | <b>p.adj</b> | <b>p.adj.signif</b> |
|---|-------------|------------|---------------|---------------|-----------|-----------|----------|-----------------|--------------|---------------------|
| 1 | control     | score      | Acomys        | Mus           | 15        | 14        | 0.496    | ns              | 0.496        | ns                  |
| 2 | dpi.004     | score      | Acomys        | Mus           | 15        | 14        | 0.00576  | **              | 0.00576      | **                  |
| 3 | dpi.014     | score      | Acomys        | Mus           | 15        | 14        | 1.51E-05 | ****            | 1.51E-05     | ****                |
| 4 | dpi.042     | score      | Acomys        | Mus           | 15        | 14        | 4.42E-11 | ****            | 4.42E-11     | ****                |
| 5 | dpi.100     | score      | Acomys        | Mus           | 15        | 14        | 3.46E-10 | ****            | 3.46E-10     | ****                |

Simple pairwise comparison (within groups)

|    | <b>group</b> | <b>.y.</b> | <b>group1</b> | <b>group2</b> | <b>n1</b> | <b>n2</b> | <b>p.adj</b> | <b>p.adj.signif</b> |
|----|--------------|------------|---------------|---------------|-----------|-----------|--------------|---------------------|
| 1  | Acomys       | score      | control       | dpi.004       | 15        | 15        | 0.00029      | ***                 |
| 2  | Acomys       | score      | control       | dpi.014       | 15        | 15        | 0.004        | **                  |
| 3  | Acomys       | score      | control       | dpi.042       | 15        | 15        | 0.00057      | ***                 |
| 4  | Acomys       | score      | control       | dpi.100       | 15        | 15        | 0.004        | **                  |
| 5  | Acomys       | score      | dpi.004       | dpi.014       | 15        | 15        | 1            | ns                  |
| 6  | Acomys       | score      | dpi.004       | dpi.042       | 15        | 15        | 0.236        | ns                  |
| 7  | Acomys       | score      | dpi.004       | dpi.100       | 15        | 15        | 0.179        | ns                  |
| 8  | Acomys       | score      | dpi.014       | dpi.042       | 15        | 15        | 1            | ns                  |
| 9  | Acomys       | score      | dpi.014       | dpi.100       | 15        | 15        | 1            | ns                  |
| 10 | Acomys       | score      | dpi.042       | dpi.100       | 15        | 15        | 1            | ns                  |
| 11 | Mus          | score      | control       | dpi.004       | 14        | 14        | 2.29E-07     | ****                |
| 12 | Mus          | score      | control       | dpi.014       | 14        | 14        | 1.11E-08     | ****                |
| 13 | Mus          | score      | control       | dpi.042       | 14        | 14        | 1.81E-08     | ****                |
| 14 | Mus          | score      | control       | dpi.100       | 14        | 14        | 2.57E-09     | ****                |
| 15 | Mus          | score      | dpi.004       | dpi.014       | 14        | 14        | 1            | ns                  |
| 16 | Mus          | score      | dpi.004       | dpi.042       | 14        | 14        | 0.199        | ns                  |
| 17 | Mus          | score      | dpi.004       | dpi.100       | 14        | 14        | 0.01         | *                   |
| 18 | Mus          | score      | dpi.014       | dpi.042       | 14        | 14        | 0.04         | *                   |
| 19 | Mus          | score      | dpi.014       | dpi.100       | 14        | 14        | 0.004        | **                  |
| 20 | Mus          | score      | dpi.042       | dpi.100       | 14        | 14        | 1            | ns                  |

**Figure 1i (Q amplitude)**

Two-way mixed ANOVA result

|   | <b>Effect</b> | <b>DFn</b> | <b>DFd</b> | <b>F</b> | <b>p</b> | <b>p&lt;.05</b> | <b>ges</b> |
|---|---------------|------------|------------|----------|----------|-----------------|------------|
| 1 | group         | 1          | 27         | 102.925  | 1.04E-10 | *               | 0.371      |
| 2 | time          | 3          | 80.99      | 14.87    | 8.48E-08 | *               | 0.318      |
| 3 | group:time    | 3          | 80.99      | 9.809    | 1.37E-05 | *               | 0.235      |

Simple pairwise comparison (between groups)

|   | <b>time</b> | <b>.y.</b> | <b>group1</b> | <b>group2</b> | <b>n1</b> | <b>n2</b> | <b>p</b> | <b>p.signif</b> | <b>p.adj</b> | <b>p.adj.signif</b> |
|---|-------------|------------|---------------|---------------|-----------|-----------|----------|-----------------|--------------|---------------------|
| 1 | control     | score      | Acomys        | Mus           | 15        | 14        | 7.84E-06 | ****            | 7.84E-06     | ****                |
| 2 | dpi.004     | score      | Acomys        | Mus           | 15        | 14        | 0.0025   | **              | 0.0025       | **                  |
| 3 | dpi.014     | score      | Acomys        | Mus           | 15        | 14        | 1.58E-05 | ****            | 1.58E-05     | ****                |
| 4 | dpi.042     | score      | Acomys        | Mus           | 15        | 14        | 0.00024  | ***             | 0.00024      | ***                 |
| 5 | dpi.100     | score      | Acomys        | Mus           | 15        | 14        | 3.11E-08 | ****            | 3.11E-08     | ****                |

Simple pairwise comparison (within groups)

|    | <b>group</b> | <b>.y.</b> | <b>group1</b> | <b>group2</b> | <b>n1</b> | <b>n2</b> | <b>p.adj</b> | <b>p.adj.signif</b> |
|----|--------------|------------|---------------|---------------|-----------|-----------|--------------|---------------------|
| 1  | Acomys       | score      | control       | dpi.004       | 15        | 15        | 0.622        | ns                  |
| 2  | Acomys       | score      | control       | dpi.014       | 15        | 15        | 1            | ns                  |
| 3  | Acomys       | score      | control       | dpi.042       | 15        | 15        | 0.088        | ns                  |
| 4  | Acomys       | score      | control       | dpi.100       | 15        | 15        | 0.942        | ns                  |
| 5  | Acomys       | score      | dpi.004       | dpi.014       | 15        | 15        | 1            | ns                  |
| 6  | Acomys       | score      | dpi.004       | dpi.042       | 15        | 15        | 1            | ns                  |
| 7  | Acomys       | score      | dpi.004       | dpi.100       | 15        | 15        | 1            | ns                  |
| 8  | Acomys       | score      | dpi.014       | dpi.042       | 15        | 15        | 1            | ns                  |
| 9  | Acomys       | score      | dpi.014       | dpi.100       | 15        | 15        | 1            | ns                  |
| 10 | Acomys       | score      | dpi.042       | dpi.100       | 15        | 15        | 1            | ns                  |
| 11 | Mus          | score      | control       | dpi.004       | 14        | 14        | 0.004        | **                  |
| 12 | Mus          | score      | control       | dpi.014       | 14        | 14        | 1.25E-05     | ****                |
| 13 | Mus          | score      | control       | dpi.042       | 14        | 14        | 0.00035      | ***                 |
| 14 | Mus          | score      | control       | dpi.100       | 14        | 14        | 1.37E-06     | ****                |
| 15 | Mus          | score      | dpi.004       | dpi.014       | 14        | 14        | 1            | ns                  |
| 16 | Mus          | score      | dpi.004       | dpi.042       | 14        | 14        | 1            | ns                  |
| 17 | Mus          | score      | dpi.004       | dpi.100       | 14        | 14        | 1            | ns                  |
| 18 | Mus          | score      | dpi.014       | dpi.042       | 14        | 14        | 1            | ns                  |
| 19 | Mus          | score      | dpi.014       | dpi.100       | 14        | 14        | 1            | ns                  |
| 20 | Mus          | score      | dpi.042       | dpi.100       | 14        | 14        | 1            | ns                  |

**Figure 1i (Q duration)**

Two-way mixed ANOVA result

|   | <b>Effect</b> | <b>DFn</b> | <b>DFd</b> | <b>F</b> | <b>p</b> | <b>p&lt;.05</b> | <b>ges</b> |
|---|---------------|------------|------------|----------|----------|-----------------|------------|
| 1 | group         | 1          | 27         | 127.224  | 1.01E-11 | *               | 0.467      |
| 2 | time          | 4          | 108        | 28.162   | 5.02E-16 | *               | 0.459      |
| 3 | group:time    | 4          | 108        | 18.356   | 1.57E-11 | *               | 0.356      |

Simple pairwise comparison (between groups)

|   | <b>time</b> | <b>.y.</b> | <b>group1</b> | <b>group2</b> | <b>n1</b> | <b>n2</b> | <b>p</b> | <b>p.signif</b> | <b>p.adj</b> | <b>p.adj.signif</b> |
|---|-------------|------------|---------------|---------------|-----------|-----------|----------|-----------------|--------------|---------------------|
| 1 | control     | score      | Acomys        | Mus           | 15        | 14        | 0.00018  | ***             | 0.00018      | ***                 |
| 2 | dpi.004     | score      | Acomys        | Mus           | 15        | 14        | 0.00034  | ***             | 0.00034      | ***                 |
| 3 | dpi.014     | score      | Acomys        | Mus           | 15        | 14        | 2.25E-10 | ****            | 2.25E-10     | ****                |
| 4 | dpi.042     | score      | Acomys        | Mus           | 15        | 14        | 1.25E-07 | ****            | 1.25E-07     | ****                |
| 5 | dpi.100     | score      | Acomys        | Mus           | 15        | 14        | 1.16E-05 | ****            | 1.16E-05     | ****                |

Simple pairwise comparison (within groups)

|    | <b>group</b> | <b>.y.</b> | <b>group1</b> | <b>group2</b> | <b>n1</b> | <b>n2</b> | <b>p.adj</b> | <b>p.adj.signif</b> |
|----|--------------|------------|---------------|---------------|-----------|-----------|--------------|---------------------|
| 1  | Acomys       | score      | control       | dpi.004       | 15        | 15        | 0.013        | *                   |
| 2  | Acomys       | score      | control       | dpi.014       | 15        | 15        | 1            | ns                  |
| 3  | Acomys       | score      | control       | dpi.042       | 15        | 15        | 1            | ns                  |
| 4  | Acomys       | score      | control       | dpi.100       | 15        | 15        | 0.645        | ns                  |
| 5  | Acomys       | score      | dpi.004       | dpi.014       | 15        | 15        | 1            | ns                  |
| 6  | Acomys       | score      | dpi.004       | dpi.042       | 15        | 15        | 1            | ns                  |
| 7  | Acomys       | score      | dpi.004       | dpi.100       | 15        | 15        | 1            | ns                  |
| 8  | Acomys       | score      | dpi.014       | dpi.042       | 15        | 15        | 1            | ns                  |
| 9  | Acomys       | score      | dpi.014       | dpi.100       | 15        | 15        | 1            | ns                  |
| 10 | Acomys       | score      | dpi.042       | dpi.100       | 15        | 15        | 1            | ns                  |
| 11 | Mus          | score      | control       | dpi.004       | 14        | 14        | 2.95E-06     | ****                |
| 12 | Mus          | score      | control       | dpi.014       | 14        | 14        | 1.42E-08     | ****                |
| 13 | Mus          | score      | control       | dpi.042       | 14        | 14        | 6.77E-06     | ****                |
| 14 | Mus          | score      | control       | dpi.100       | 14        | 14        | 3.17E-05     | ****                |
| 15 | Mus          | score      | dpi.004       | dpi.014       | 14        | 14        | 0.647        | ns                  |
| 16 | Mus          | score      | dpi.004       | dpi.042       | 14        | 14        | 1            | ns                  |
| 17 | Mus          | score      | dpi.004       | dpi.100       | 14        | 14        | 1            | ns                  |
| 18 | Mus          | score      | dpi.014       | dpi.042       | 14        | 14        | 1            | ns                  |
| 19 | Mus          | score      | dpi.014       | dpi.100       | 14        | 14        | 1            | ns                  |
| 20 | Mus          | score      | dpi.042       | dpi.100       | 14        | 14        | 1            | ns                  |

**Figure 1i (R amplitude)**

Two-way mixed ANOVA result

|   | <b>Effect</b> | <b>DFn</b> | <b>DFd</b> | <b>F</b> | <b>p</b> | <b>p&lt;.05</b> | <b>ges</b> |
|---|---------------|------------|------------|----------|----------|-----------------|------------|
| 1 | group         | 1          | 27         | 8.013    | 0.009    | *               | 0.06       |
| 2 | time          | 4          | 108        | 33.994   | 2.40E-18 | *               | 0.497      |
| 3 | group:time    | 4          | 108        | 2.005    | 0.099    |                 | 0.055      |

Simple pairwise comparison (between groups)

|   | <b>time</b> | <b>.y.</b> | <b>group1</b> | <b>group2</b> | <b>n1</b> | <b>n2</b> | <b>p</b> | <b>p.signif</b> | <b>p.adj</b> | <b>p.adj.signif</b> |
|---|-------------|------------|---------------|---------------|-----------|-----------|----------|-----------------|--------------|---------------------|
| 1 | control     | score      | Acomys        | Mus           | 15        | 14        | 0.404    | ns              | 0.404        | ns                  |
| 2 | dpi.004     | score      | Acomys        | Mus           | 15        | 14        | 0.0325   | *               | 0.0325       | *                   |
| 3 | dpi.014     | score      | Acomys        | Mus           | 15        | 14        | 0.00742  | **              | 0.00742      | **                  |
| 4 | dpi.042     | score      | Acomys        | Mus           | 15        | 14        | 0.479    | ns              | 0.479        | ns                  |
| 5 | dpi.100     | score      | Acomys        | Mus           | 15        | 14        | 0.799    | ns              | 0.799        | ns                  |

Simple pairwise comparison (within groups)

|    | <b>group</b> | <b>.y.</b> | <b>group1</b> | <b>group2</b> | <b>n1</b> | <b>n2</b> | <b>p.adj</b> | <b>p.adj.signif</b> |
|----|--------------|------------|---------------|---------------|-----------|-----------|--------------|---------------------|
| 1  | Acomys       | score      | control       | dpi.004       | 15        | 15        | 9.91E-05     | ****                |
| 2  | Acomys       | score      | control       | dpi.014       | 15        | 15        | 0.001        | **                  |
| 3  | Acomys       | score      | control       | dpi.042       | 15        | 15        | 3.94E-05     | ****                |
| 4  | Acomys       | score      | control       | dpi.100       | 15        | 15        | 0.00056      | ***                 |
| 5  | Acomys       | score      | dpi.004       | dpi.014       | 15        | 15        | 0.836        | ns                  |
| 6  | Acomys       | score      | dpi.004       | dpi.042       | 15        | 15        | 1            | ns                  |
| 7  | Acomys       | score      | dpi.004       | dpi.100       | 15        | 15        | 1            | ns                  |
| 8  | Acomys       | score      | dpi.014       | dpi.042       | 15        | 15        | 1            | ns                  |
| 9  | Acomys       | score      | dpi.014       | dpi.100       | 15        | 15        | 0.411        | ns                  |
| 10 | Acomys       | score      | dpi.042       | dpi.100       | 15        | 15        | 1            | ns                  |
| 11 | Mus          | score      | control       | dpi.004       | 14        | 14        | 6.26E-06     | ****                |
| 12 | Mus          | score      | control       | dpi.014       | 14        | 14        | 8.35E-06     | ****                |
| 13 | Mus          | score      | control       | dpi.042       | 14        | 14        | 2.22E-05     | ****                |
| 14 | Mus          | score      | control       | dpi.100       | 14        | 14        | 0.002        | **                  |
| 15 | Mus          | score      | dpi.004       | dpi.014       | 14        | 14        | 1            | ns                  |
| 16 | Mus          | score      | dpi.004       | dpi.042       | 14        | 14        | 0.889        | ns                  |
| 17 | Mus          | score      | dpi.004       | dpi.100       | 14        | 14        | 1            | ns                  |
| 18 | Mus          | score      | dpi.014       | dpi.042       | 14        | 14        | 1            | ns                  |
| 19 | Mus          | score      | dpi.014       | dpi.100       | 14        | 14        | 1            | ns                  |
| 20 | Mus          | score      | dpi.042       | dpi.100       | 14        | 14        | 1            | ns                  |

**Figure 1i (R duration)**

Two-way mixed ANOVA result

|   | <b>Effect</b> | <b>DFn</b> | <b>DFd</b> | <b>F</b> | <b>p</b> | <b>p&lt;.05</b> | <b>ges</b> |
|---|---------------|------------|------------|----------|----------|-----------------|------------|
| 1 | group         | 1          | 27         | 130.012  | 7.92E-12 | *               | 0.415      |
| 2 | time          | 2.98       | 80.56      | 5.157    | 0.003    | *               | 0.14       |
| 3 | group:time    | 2.98       | 80.56      | 6.989    | 0.00032  | *               | 0.181      |

Simple pairwise comparison (between groups)

|   | <b>time</b> | <b>.y.</b> | <b>group1</b> | <b>group2</b> | <b>n1</b> | <b>n2</b> | <b>p</b> | <b>p.signif</b> | <b>p.adj</b> | <b>p.adj.signif</b> |
|---|-------------|------------|---------------|---------------|-----------|-----------|----------|-----------------|--------------|---------------------|
| 1 | control     | score      | Acomys        | Mus           | 15        | 14        | 0.979    | ns              | 0.979        | ns                  |
| 2 | dpi.004     | score      | Acomys        | Mus           | 15        | 14        | 0.00487  | **              | 0.00487      | **                  |
| 3 | dpi.014     | score      | Acomys        | Mus           | 15        | 14        | 4.60E-06 | ****            | 4.60E-06     | ****                |
| 4 | dpi.042     | score      | Acomys        | Mus           | 15        | 14        | 2.70E-07 | ****            | 2.70E-07     | ****                |
| 5 | dpi.100     | score      | Acomys        | Mus           | 15        | 14        | 7.22E-05 | ****            | 7.22E-05     | ****                |

Simple pairwise comparison (within groups)

|    | <b>group</b> | <b>.y.</b> | <b>group1</b> | <b>group2</b> | <b>n1</b> | <b>n2</b> | <b>p.adj</b> | <b>p.adj.signif</b> |
|----|--------------|------------|---------------|---------------|-----------|-----------|--------------|---------------------|
| 1  | Acomys       | score      | control       | dpi.004       | 15        | 15        | 0.418        | ns                  |
| 2  | Acomys       | score      | control       | dpi.014       | 15        | 15        | 1            | ns                  |
| 3  | Acomys       | score      | control       | dpi.042       | 15        | 15        | 0.753        | ns                  |
| 4  | Acomys       | score      | control       | dpi.100       | 15        | 15        | 1            | ns                  |
| 5  | Acomys       | score      | dpi.004       | dpi.014       | 15        | 15        | 0.291        | ns                  |
| 6  | Acomys       | score      | dpi.004       | dpi.042       | 15        | 15        | 0.231        | ns                  |
| 7  | Acomys       | score      | dpi.004       | dpi.100       | 15        | 15        | 0.175        | ns                  |
| 8  | Acomys       | score      | dpi.014       | dpi.042       | 15        | 15        | 1            | ns                  |
| 9  | Acomys       | score      | dpi.014       | dpi.100       | 15        | 15        | 1            | ns                  |
| 10 | Acomys       | score      | dpi.042       | dpi.100       | 15        | 15        | 1            | ns                  |
| 11 | Mus          | score      | control       | dpi.004       | 14        | 14        | 0.005        | **                  |
| 12 | Mus          | score      | control       | dpi.014       | 14        | 14        | 0.0008       | ***                 |
| 13 | Mus          | score      | control       | dpi.042       | 14        | 14        | 0.00011      | ***                 |
| 14 | Mus          | score      | control       | dpi.100       | 14        | 14        | 0.006        | **                  |
| 15 | Mus          | score      | dpi.004       | dpi.014       | 14        | 14        | 1            | ns                  |
| 16 | Mus          | score      | dpi.004       | dpi.042       | 14        | 14        | 1            | ns                  |
| 17 | Mus          | score      | dpi.004       | dpi.100       | 14        | 14        | 1            | ns                  |
| 18 | Mus          | score      | dpi.014       | dpi.042       | 14        | 14        | 1            | ns                  |
| 19 | Mus          | score      | dpi.014       | dpi.100       | 14        | 14        | 1            | ns                  |
| 20 | Mus          | score      | dpi.042       | dpi.100       | 14        | 14        | 1            | ns                  |

**Figure 1i (S amplitude)**

Two-way mixed ANOVA result

|   | <b>Effect</b> | <b>DFn</b> | <b>DFd</b> | <b>F</b> | <b>p</b> | <b>p&lt;.05</b> | <b>ges</b> |
|---|---------------|------------|------------|----------|----------|-----------------|------------|
| 1 | group         | 1          | 27         | 224.806  | 1.30E-14 | *               | 0.534      |
| 2 | time          | 4          | 108        | 4.175    | 0.003    | *               | 0.118      |
| 3 | group:time    | 4          | 108        | 1.054    | 0.383    |                 | 0.033      |

Simple pairwise comparison (between groups)

|   | <b>time</b> | <b>.y.</b> | <b>group1</b> | <b>group2</b> | <b>n1</b> | <b>n2</b> | <b>p</b> | <b>p.signif</b> | <b>p.adj</b> | <b>p.adj.signif</b> |
|---|-------------|------------|---------------|---------------|-----------|-----------|----------|-----------------|--------------|---------------------|
| 1 | control     | score      | Acomys        | Mus           | 15        | 14        | 0.404    | ns              | 0.404        | ns                  |
| 2 | dpi.004     | score      | Acomys        | Mus           | 15        | 14        | 0.0325   | *               | 0.0325       | *                   |
| 3 | dpi.014     | score      | Acomys        | Mus           | 15        | 14        | 0.00742  | **              | 0.00742      | **                  |
| 4 | dpi.042     | score      | Acomys        | Mus           | 15        | 14        | 0.479    | ns              | 0.479        | ns                  |
| 5 | dpi.100     | score      | Acomys        | Mus           | 15        | 14        | 0.799    | ns              | 0.799        | ns                  |

Simple pairwise comparison (within groups)

|    | <b>group</b> | <b>.y.</b> | <b>group1</b> | <b>group2</b> | <b>n1</b> | <b>n2</b> | <b>p.adj</b> | <b>p.adj.signif</b> |
|----|--------------|------------|---------------|---------------|-----------|-----------|--------------|---------------------|
| 1  | Acomys       | score      | control       | dpi.004       | 15        | 15        | 0.954        | ns                  |
| 2  | Acomys       | score      | control       | dpi.014       | 15        | 15        | 1            | ns                  |
| 3  | Acomys       | score      | control       | dpi.042       | 15        | 15        | 0.024        | *                   |
| 4  | Acomys       | score      | control       | dpi.100       | 15        | 15        | 0.724        | ns                  |
| 5  | Acomys       | score      | dpi.004       | dpi.014       | 15        | 15        | 1            | ns                  |
| 6  | Acomys       | score      | dpi.004       | dpi.042       | 15        | 15        | 1            | ns                  |
| 7  | Acomys       | score      | dpi.004       | dpi.100       | 15        | 15        | 1            | ns                  |
| 8  | Acomys       | score      | dpi.014       | dpi.042       | 15        | 15        | 1            | ns                  |
| 9  | Acomys       | score      | dpi.014       | dpi.100       | 15        | 15        | 1            | ns                  |
| 10 | Acomys       | score      | dpi.042       | dpi.100       | 15        | 15        | 1            | ns                  |
| 11 | Mus          | score      | control       | dpi.004       | 14        | 14        | 0.42         | ns                  |
| 12 | Mus          | score      | control       | dpi.014       | 14        | 14        | 1            | ns                  |
| 13 | Mus          | score      | control       | dpi.042       | 14        | 14        | 0.136        | ns                  |
| 14 | Mus          | score      | control       | dpi.100       | 14        | 14        | 0.234        | ns                  |
| 15 | Mus          | score      | dpi.004       | dpi.014       | 14        | 14        | 1            | ns                  |
| 16 | Mus          | score      | dpi.004       | dpi.042       | 14        | 14        | 1            | ns                  |
| 17 | Mus          | score      | dpi.004       | dpi.100       | 14        | 14        | 1            | ns                  |
| 18 | Mus          | score      | dpi.014       | dpi.042       | 14        | 14        | 1            | ns                  |
| 19 | Mus          | score      | dpi.014       | dpi.100       | 14        | 14        | 1            | ns                  |
| 20 | Mus          | score      | dpi.042       | dpi.100       | 14        | 14        | 1            | ns                  |

**Figure 1i (S duration)**

Two-way mixed ANOVA result

|   | <b>Effect</b> | <b>DFn</b> | <b>DFd</b> | <b>F</b> | <b>p</b> | <b>p&lt;.05</b> | <b>ges</b> |
|---|---------------|------------|------------|----------|----------|-----------------|------------|
| 1 | group         | 1          | 27         | 28.611   | 1.19E-05 | *               | 0.103      |
| 2 | time          | 4          | 108        | 3.191    | 0.016    | *               | 0.095      |
| 3 | group:time    | 4          | 108        | 2.448    | 0.051    |                 | 0.075      |

Simple pairwise comparison (between groups)

|   | <b>time</b> | <b>.y.</b> | <b>group1</b> | <b>group2</b> | <b>n1</b> | <b>n2</b> | <b>p</b> | <b>p.signif</b> | <b>p.adj</b> | <b>p.adj.signif</b> |
|---|-------------|------------|---------------|---------------|-----------|-----------|----------|-----------------|--------------|---------------------|
| 1 | control     | score      | Acomys        | Mus           | 15        | 14        | 0.624    | ns              | 0.624        | ns                  |
| 2 | dpi.004     | score      | Acomys        | Mus           | 15        | 14        | 0.483    | ns              | 0.483        | ns                  |
| 3 | dpi.014     | score      | Acomys        | Mus           | 15        | 14        | 0.192    | ns              | 0.192        | ns                  |
| 4 | dpi.042     | score      | Acomys        | Mus           | 15        | 14        | 0.00295  | **              | 0.00295      | **                  |
| 5 | dpi.100     | score      | Acomys        | Mus           | 15        | 14        | 0.00024  | ***             | 0.00024      | ***                 |

Simple pairwise comparison (within groups)

|    | <b>group</b> | <b>.y.</b> | <b>group1</b> | <b>group2</b> | <b>n1</b> | <b>n2</b> | <b>p.adj</b> | <b>p.adj.signif</b> |
|----|--------------|------------|---------------|---------------|-----------|-----------|--------------|---------------------|
| 1  | Acomys       | score      | control       | dpi.004       | 15        | 15        | 0.997        | ns                  |
| 2  | Acomys       | score      | control       | dpi.014       | 15        | 15        | 1            | ns                  |
| 3  | Acomys       | score      | control       | dpi.042       | 15        | 15        | 0.001        | **                  |
| 4  | Acomys       | score      | control       | dpi.100       | 15        | 15        | 0.003        | **                  |
| 5  | Acomys       | score      | dpi.004       | dpi.014       | 15        | 15        | 1            | ns                  |
| 6  | Acomys       | score      | dpi.004       | dpi.042       | 15        | 15        | 0.103        | ns                  |
| 7  | Acomys       | score      | dpi.004       | dpi.100       | 15        | 15        | 0.23         | ns                  |
| 8  | Acomys       | score      | dpi.014       | dpi.042       | 15        | 15        | 0.357        | ns                  |
| 9  | Acomys       | score      | dpi.014       | dpi.100       | 15        | 15        | 1            | ns                  |
| 10 | Acomys       | score      | dpi.042       | dpi.100       | 15        | 15        | 1            | ns                  |
| 11 | Mus          | score      | control       | dpi.004       | 14        | 14        | 1            | ns                  |
| 12 | Mus          | score      | control       | dpi.014       | 14        | 14        | 1            | ns                  |
| 13 | Mus          | score      | control       | dpi.042       | 14        | 14        | 1            | ns                  |
| 14 | Mus          | score      | control       | dpi.100       | 14        | 14        | 1            | ns                  |
| 15 | Mus          | score      | dpi.004       | dpi.014       | 14        | 14        | 1            | ns                  |
| 16 | Mus          | score      | dpi.004       | dpi.042       | 14        | 14        | 1            | ns                  |
| 17 | Mus          | score      | dpi.004       | dpi.100       | 14        | 14        | 1            | ns                  |
| 18 | Mus          | score      | dpi.014       | dpi.042       | 14        | 14        | 1            | ns                  |
| 19 | Mus          | score      | dpi.014       | dpi.100       | 14        | 14        | 1            | ns                  |
| 20 | Mus          | score      | dpi.042       | dpi.100       | 14        | 14        | 1            | ns                  |

**Figure 2b (TUNEL assay)**

Two-way mixed ANOVA result

|   | <b>Effect</b> | <b>DFn</b> | <b>DFd</b> | <b>F</b> | <b>p</b> | <b>p&lt;.05</b> | <b>ges</b> |
|---|---------------|------------|------------|----------|----------|-----------------|------------|
| 1 | group         | 1          | 6          | 0.11     | 0.751    |                 | 0.004      |
| 2 | time          | 1.09       | 6.54       | 33.583   | 0.00076  | *               | 0.811      |
| 3 | group:time    | 1.09       | 6.54       | 0.212    | 0.681    |                 | 0.026      |

Simple pairwise comparison (between groups)

|   | <b>time</b> | <b>.y.</b> | <b>group1</b> | <b>group2</b> | <b>n1</b> | <b>n2</b> | <b>p</b> | <b>p.signif</b> | <b>p.adj</b> | <b>p.adj.signif</b> |
|---|-------------|------------|---------------|---------------|-----------|-----------|----------|-----------------|--------------|---------------------|
| 1 | dpi.001     | score      | Acomys        | Mus           | 5         | 4         | 0.935    | ns              | 0.935        | ns                  |
| 2 | dpi.004     | score      | Acomys        | Mus           | 5         | 4         | 0.2      | ns              | 0.2          | ns                  |
| 3 | dpi.014     | score      | Acomys        | Mus           | 5         | 4         | 0.732    | ns              | 0.732        | ns                  |
| 4 | dpi.042     | score      | Acomys        | Mus           | 5         | 4         | 0.157    | ns              | 0.157        | ns                  |
| 5 | dpi.100     | score      | Acomys        | Mus           | 5         | 4         | 0.0767   | ns              | 0.0767       | ns                  |

Simple pairwise comparison (within groups)

|    | <b>group</b> | <b>.y.</b> | <b>group1</b> | <b>group2</b> | <b>n1</b> | <b>n2</b> | <b>p.adj</b> | <b>p.adj.signif</b> |
|----|--------------|------------|---------------|---------------|-----------|-----------|--------------|---------------------|
| 1  | Acomys       | score      | control       | dpi.001       | 5         | 5         | 0.364        | ns                  |
| 2  | Acomys       | score      | control       | dpi.004       | 5         | 5         | 0.774        | ns                  |
| 3  | Acomys       | score      | control       | dpi.014       | 5         | 5         | 0.762        | ns                  |
| 4  | Acomys       | score      | control       | dpi.042       | 5         | 5         | 0.951        | ns                  |
| 5  | Acomys       | score      | control       | dpi.100       | 5         | 5         | 0.064        | ns                  |
| 6  | Acomys       | score      | dpi.001       | dpi.004       | 5         | 5         | 0.397        | ns                  |
| 7  | Acomys       | score      | dpi.001       | dpi.014       | 5         | 5         | 0.382        | ns                  |
| 8  | Acomys       | score      | dpi.001       | dpi.042       | 5         | 5         | 0.366        | ns                  |
| 9  | Acomys       | score      | dpi.001       | dpi.100       | 5         | 5         | 0.411        | ns                  |
| 10 | Acomys       | score      | dpi.004       | dpi.014       | 5         | 5         | 1            | ns                  |
| 11 | Acomys       | score      | dpi.004       | dpi.042       | 5         | 5         | 1            | ns                  |
| 12 | Acomys       | score      | dpi.004       | dpi.100       | 5         | 5         | 1            | ns                  |
| 13 | Acomys       | score      | dpi.014       | dpi.042       | 5         | 5         | 1            | ns                  |
| 14 | Acomys       | score      | dpi.014       | dpi.100       | 5         | 5         | 1            | ns                  |
| 15 | Acomys       | score      | dpi.042       | dpi.100       | 5         | 5         | 1            | ns                  |
| 16 | Mus          | score      | control       | dpi.001       | 4         | 4         | 0.284        | ns                  |
| 17 | Mus          | score      | control       | dpi.004       | 4         | 4         | 0.237        | ns                  |
| 18 | Mus          | score      | control       | dpi.014       | 4         | 4         | 0.566        | ns                  |
| 19 | Mus          | score      | control       | dpi.042       | 4         | 4         | 1            | ns                  |
| 20 | Mus          | score      | control       | dpi.100       | 4         | 4         | 0.273        | ns                  |
| 21 | Mus          | score      | dpi.001       | dpi.004       | 4         | 4         | 0.316        | ns                  |
| 22 | Mus          | score      | dpi.001       | dpi.014       | 4         | 4         | 0.394        | ns                  |
| 23 | Mus          | score      | dpi.001       | dpi.042       | 4         | 4         | 0.272        | ns                  |
| 24 | Mus          | score      | dpi.001       | dpi.100       | 4         | 4         | 0.618        | ns                  |
| 25 | Mus          | score      | dpi.004       | dpi.014       | 4         | 4         | 1            | ns                  |
| 26 | Mus          | score      | dpi.004       | dpi.042       | 4         | 4         | 0.532        | ns                  |
| 27 | Mus          | score      | dpi.004       | dpi.100       | 4         | 4         | 1            | ns                  |
| 28 | Mus          | score      | dpi.014       | dpi.042       | 4         | 4         | 1            | ns                  |
| 29 | Mus          | score      | dpi.014       | dpi.100       | 4         | 4         | 0.848        | ns                  |
| 30 | Mus          | score      | dpi.042       | dpi.100       | 4         | 4         | 0.93         | ns                  |



**Figure 2c (Heart body weight ratio)**

Two-way mixed ANOVA result

|   | <b>Effect</b> | <b>DFn</b> | <b>DFd</b> | <b>F</b> | <b>p</b> | <b>p&lt;.05</b> | <b>ges</b> |
|---|---------------|------------|------------|----------|----------|-----------------|------------|
| 1 | group         | 1          | 18         | 168.623  | 1.40E-10 | *               | 0.791      |
| 2 | time          | 2.15       | 38.74      | 32.155   | 3.03E-09 | *               | 0.515      |
| 3 | group:time    | 2.15       | 38.74      | 6.678    | 0.003    | *               | 0.181      |

Simple pairwise comparison (between groups)

|   | <b>time</b> | <b>.y.</b> | <b>group1</b> | <b>group2</b> | <b>n1</b> | <b>n2</b> | <b>p</b> | <b>p.signif</b> | <b>p.adj</b> | <b>p.adj.signif</b> |
|---|-------------|------------|---------------|---------------|-----------|-----------|----------|-----------------|--------------|---------------------|
| 1 | control     | score      | Acomys        | Mus           | 10        | 10        | 3.20E-10 | ****            | 3.20E-10     | ****                |
| 2 | dpi.014     | score      | Acomys        | Mus           | 10        | 10        | 8.23E-10 | ****            | 8.23E-10     | ****                |
| 3 | dpi.042     | score      | Acomys        | Mus           | 10        | 10        | 3.99E-07 | ****            | 3.99E-07     | ****                |
| 4 | dpi.100     | score      | Acomys        | Mus           | 10        | 10        | 5.27E-07 | ****            | 5.27E-07     | ****                |

Simple pairwise comparison (within groups)

|    | <b>group</b> | <b>.y.</b> | <b>group1</b> | <b>group2</b> | <b>n1</b> | <b>n2</b> | <b>p.adj</b> | <b>p.adj.signif</b> |
|----|--------------|------------|---------------|---------------|-----------|-----------|--------------|---------------------|
| 1  | Acomys       | score      | control       | dpi.014       | 10        | 10        | 0.035        | *                   |
| 2  | Acomys       | score      | control       | dpi.042       | 10        | 10        | 0.001        | **                  |
| 3  | Acomys       | score      | control       | dpi.100       | 10        | 10        | 0.001        | **                  |
| 4  | Acomys       | score      | dpi.014       | dpi.042       | 10        | 10        | 0.024        | *                   |
| 5  | Acomys       | score      | dpi.014       | dpi.100       | 10        | 10        | 0.395        | ns                  |
| 6  | Acomys       | score      | dpi.042       | dpi.100       | 10        | 10        | 1            | ns                  |
| 7  | Mus          | score      | control       | dpi.014       | 10        | 10        | 0.00059      | ***                 |
| 8  | Mus          | score      | control       | dpi.042       | 10        | 10        | 0.00011      | ***                 |
| 9  | Mus          | score      | control       | dpi.100       | 10        | 10        | 0.00067      | ***                 |
| 10 | Mus          | score      | dpi.014       | dpi.042       | 10        | 10        | 0.073        | ns                  |
| 11 | Mus          | score      | dpi.014       | dpi.100       | 10        | 10        | 0.29         | ns                  |
| 12 | Mus          | score      | dpi.042       | dpi.100       | 10        | 10        | 1            | ns                  |

**Figure 2d (Heart size)**

Two-way mixed ANOVA result

|   | <b>Effect</b> | <b>DFn</b> | <b>DFd</b> | <b>F</b> | <b>p</b> | <b>p&lt;.05</b> | <b>ges</b> |
|---|---------------|------------|------------|----------|----------|-----------------|------------|
| 1 | group         | 1          | 6          | 15.586   | 0.008    | *               | 0.61       |
| 2 | time          | 3          | 18         | 34.966   | 1.02E-07 | *               | 0.699      |
| 3 | group:time    | 3          | 18         | 9.785    | 0.00047  | *               | 0.394      |

Simple pairwise comparison (between groups)

|   | <b>time</b> | <b>.y.</b> | <b>group1</b> | <b>group2</b> | <b>n1</b> | <b>n2</b> | <b>p</b> | <b>p.signif</b> | <b>p.adj</b> | <b>p.adj.signif</b> |
|---|-------------|------------|---------------|---------------|-----------|-----------|----------|-----------------|--------------|---------------------|
| 1 | control     | score      | Acomys        | Mus           | 5         | 4         | 0.672    | ns              | 0.672        | ns                  |
| 2 | dpi.014     | score      | Acomys        | Mus           | 5         | 4         | 0.0591   | ns              | 0.0591       | ns                  |
| 3 | dpi.042     | score      | Acomys        | Mus           | 5         | 4         | 0.0425   | *               | 0.0425       | *                   |
| 4 | dpi.100     | score      | Acomys        | Mus           | 5         | 4         | 0.00053  | ***             | 0.00053      | ***                 |

Simple pairwise comparison (within groups)

|    | <b>group</b> | <b>.y.</b> | <b>group1</b> | <b>group2</b> | <b>n1</b> | <b>n2</b> | <b>p.adj</b> | <b>p.adj.signif</b> |
|----|--------------|------------|---------------|---------------|-----------|-----------|--------------|---------------------|
| 1  | Acomys       | score      | control       | dpi.014       | 5         | 5         | 1            | ns                  |
| 2  | Acomys       | score      | control       | dpi.042       | 5         | 5         | 0.357        | ns                  |
| 3  | Acomys       | score      | control       | dpi.100       | 5         | 5         | 0.426        | ns                  |
| 4  | Acomys       | score      | dpi.014       | dpi.042       | 5         | 5         | 0.05         | *                   |
| 5  | Acomys       | score      | dpi.014       | dpi.100       | 5         | 5         | 0.196        | ns                  |
| 6  | Acomys       | score      | dpi.042       | dpi.100       | 5         | 5         | 1            | ns                  |
| 7  | Mus          | score      | control       | dpi.014       | 4         | 4         | 0.726        | ns                  |
| 8  | Mus          | score      | control       | dpi.042       | 4         | 4         | 0.032        | *                   |
| 9  | Mus          | score      | control       | dpi.100       | 4         | 4         | 0.002        | **                  |
| 10 | Mus          | score      | dpi.014       | dpi.042       | 4         | 4         | 0.563        | ns                  |
| 11 | Mus          | score      | dpi.014       | dpi.100       | 4         | 4         | 0.031        | *                   |
| 12 | Mus          | score      | dpi.042       | dpi.100       | 4         | 4         | 0.558        | ns                  |

**Figure 2e (Heart wall thickness)**

Two-way mixed ANOVA result

|   | <b>Effect</b> | <b>DFn</b> | <b>DFd</b> | <b>F</b> | <b>p</b> | <b>p&lt;.05</b> | <b>ges</b> |
|---|---------------|------------|------------|----------|----------|-----------------|------------|
| 1 | group         | 1          | 6          | 4.755    | 0.072    |                 | 0.201      |
| 2 | time          | 1.23       | 7.35       | 155.302  | 2.25E-06 | *               | 0.946      |
| 3 | group:time    | 1.23       | 7.35       | 1.206    | 0.322    |                 | 0.121      |

Simple pairwise comparison (between groups)

|   | <b>time</b> | <b>.y.</b> | <b>group1</b> | <b>group2</b> | <b>n1</b> | <b>n2</b> | <b>p</b> | <b>p.signif</b> | <b>p.adj</b> | <b>p.adj.signif</b> |
|---|-------------|------------|---------------|---------------|-----------|-----------|----------|-----------------|--------------|---------------------|
| 1 | control     | score      | Acomys        | Mus           | 6         | 4         | 0.862    | ns              | 0.862        | ns                  |
| 2 | dpi.014     | score      | Acomys        | Mus           | 6         | 4         | 0.0051   | **              | 0.0051       | **                  |
| 3 | dpi.042     | score      | Acomys        | Mus           | 6         | 4         | 0.0101   | *               | 0.0101       | *                   |
| 4 | dpi.100     | score      | Acomys        | Mus           | 6         | 4         | 0.00959  | **              | 0.00959      | **                  |

Simple pairwise comparison (within groups)

|    | <b>group</b> | <b>.y.</b> | <b>group1</b> | <b>group2</b> | <b>n1</b> | <b>n2</b> | <b>p.adj</b> | <b>p.adj.signif</b> |
|----|--------------|------------|---------------|---------------|-----------|-----------|--------------|---------------------|
| 1  | Acomys       | score      | control       | dpi.014       | 4         | 4         | 0.042        | *                   |
| 2  | Acomys       | score      | control       | dpi.042       | 4         | 4         | 0.015        | *                   |
| 3  | Acomys       | score      | control       | dpi.100       | 4         | 4         | 0.04         | *                   |
| 4  | Acomys       | score      | dpi.014       | dpi.042       | 4         | 4         | 1            | ns                  |
| 5  | Acomys       | score      | dpi.014       | dpi.100       | 4         | 4         | 0.218        | ns                  |
| 6  | Acomys       | score      | dpi.042       | dpi.100       | 4         | 4         | 1            | ns                  |
| 7  | Mus          | score      | control       | dpi.014       | 4         | 4         | 0.009        | **                  |
| 8  | Mus          | score      | control       | dpi.042       | 4         | 4         | 0.006        | **                  |
| 9  | Mus          | score      | control       | dpi.100       | 4         | 4         | 0.006        | **                  |
| 10 | Mus          | score      | dpi.014       | dpi.042       | 4         | 4         | 0.185        | ns                  |
| 11 | Mus          | score      | dpi.014       | dpi.100       | 4         | 4         | 0.067        | ns                  |
| 12 | Mus          | score      | dpi.042       | dpi.100       | 4         | 4         | 0.672        | ns                  |

**Figure 2f (Nppa RT-qPCR)**

Two-way mixed ANOVA result

|   | <b>Effect</b> | <b>DFn</b> | <b>DFd</b> | <b>F</b> | <b>p</b> | <b>p&lt;.05</b> | <b>ges</b> |
|---|---------------|------------|------------|----------|----------|-----------------|------------|
| 1 | group         | 1          | 7          | 303.848  | 5.03E-07 | *               | 0.655      |
| 2 | time          | 1.28       | 8.96       | 7.396    | 0.019    | *               | 0.503      |
| 3 | group:time    | 1.28       | 8.96       | 9.716    | 0.01     | *               | 0.57       |

Simple pairwise comparison (between groups)

|   | <b>time</b> | <b>.y.</b> | <b>group1</b> | <b>group2</b> | <b>n1</b> | <b>n2</b> | <b>p</b> | <b>p.signif</b> | <b>p.adj</b> | <b>p.adj.signif</b> |
|---|-------------|------------|---------------|---------------|-----------|-----------|----------|-----------------|--------------|---------------------|
| 1 | control     | score      | Acomys        | Mus           | 6         | 8         | 1        | ns              | 1            | ns                  |
| 2 | dpi.004     | score      | Acomys        | Mus           | 6         | 8         | 0.00891  | **              | 0.00891      | **                  |
| 3 | dpi.014     | score      | Acomys        | Mus           | 6         | 8         | 0.00861  | **              | 0.00861      | **                  |
| 4 | dpi.042     | score      | Acomys        | Mus           | 6         | 8         | 0.0311   | *               | 0.0311       | *                   |
| 5 | dpi.100     | score      | Acomys        | Mus           | 6         | 8         | 0.00367  | **              | 0.00367      | **                  |

Simple pairwise comparison (within groups)

|    | <b>group</b> | <b>.y.</b> | <b>group1</b> | <b>group2</b> | <b>n1</b> | <b>n2</b> | <b>p.adj</b> | <b>p.adj.signif</b> |
|----|--------------|------------|---------------|---------------|-----------|-----------|--------------|---------------------|
| 1  | Acomys       | score      | control       | dpi.004       | 6         | 6         | 0.569        | ns                  |
| 2  | Acomys       | score      | control       | dpi.014       | 6         | 6         | 1            | ns                  |
| 3  | Acomys       | score      | control       | dpi.042       | 6         | 6         | 0.485        | ns                  |
| 4  | Acomys       | score      | control       | dpi.100       | 6         | 6         | 1            | ns                  |
| 5  | Acomys       | score      | dpi.004       | dpi.014       | 6         | 6         | 1            | ns                  |
| 6  | Acomys       | score      | dpi.004       | dpi.042       | 6         | 6         | 1            | ns                  |
| 7  | Acomys       | score      | dpi.004       | dpi.100       | 6         | 6         | 1            | ns                  |
| 8  | Acomys       | score      | dpi.014       | dpi.042       | 6         | 6         | 1            | ns                  |
| 9  | Acomys       | score      | dpi.014       | dpi.100       | 6         | 6         | 1            | ns                  |
| 10 | Acomys       | score      | dpi.042       | dpi.100       | 6         | 6         | 1            | ns                  |
| 11 | Mus          | score      | control       | dpi.004       | 8         | 8         | 0.165        | ns                  |
| 12 | Mus          | score      | control       | dpi.014       | 8         | 8         | 0.246        | ns                  |
| 13 | Mus          | score      | control       | dpi.042       | 8         | 8         | 0.282        | ns                  |
| 14 | Mus          | score      | control       | dpi.100       | 8         | 8         | 0.75         | ns                  |
| 15 | Mus          | score      | dpi.004       | dpi.014       | 8         | 8         | 1            | ns                  |
| 16 | Mus          | score      | dpi.004       | dpi.042       | 8         | 8         | 1            | ns                  |
| 17 | Mus          | score      | dpi.004       | dpi.100       | 8         | 8         | 1            | ns                  |
| 18 | Mus          | score      | dpi.014       | dpi.042       | 8         | 8         | 0.883        | ns                  |
| 19 | Mus          | score      | dpi.014       | dpi.100       | 8         | 8         | 0.949        | ns                  |
| 20 | Mus          | score      | dpi.042       | dpi.100       | 8         | 8         | 1            | ns                  |

**Figure 2f (Myh6 RT-qPCR)**

Two-way mixed ANOVA result

|   | <b>Effect</b> | <b>DFn</b> | <b>DFd</b> | <b>F</b> | <b>p</b> | <b>p&lt;.05</b> | <b>ges</b> |
|---|---------------|------------|------------|----------|----------|-----------------|------------|
| 1 | group         | 1          | 7          | 7.05     | 0.033    | *               | 0.234      |
| 2 | time          | 4          | 28         | 5.312    | 0.003    | *               | 0.346      |
| 3 | group:time    | 4          | 28         | 12.3     | 6.76E-06 | *               | 0.55       |

Simple pairwise comparison (between groups)

|   | <b>time</b> | <b>.y.</b> | <b>group1</b> | <b>group2</b> | <b>n1</b> | <b>n2</b> | <b>p</b> | <b>p.signif</b> | <b>p.adj</b> | <b>p.adj.signif</b> |
|---|-------------|------------|---------------|---------------|-----------|-----------|----------|-----------------|--------------|---------------------|
| 1 | control     | score      | Acomys        | Mus           | 6         | 8         | 1        | ns              | 1            | ns                  |
| 2 | dpi.004     | score      | Acomys        | Mus           | 6         | 8         | 0.0144   | *               | 0.0144       | *                   |
| 3 | dpi.014     | score      | Acomys        | Mus           | 6         | 8         | 0.00022  | ***             | 0.00022      | ***                 |
| 4 | dpi.042     | score      | Acomys        | Mus           | 6         | 8         | 0.331    | ns              | 0.331        | ns                  |
| 5 | dpi.100     | score      | Acomys        | Mus           | 6         | 8         | 0.837    | ns              | 0.837        | ns                  |

Simple pairwise comparison (within groups)

|    | <b>group</b> | <b>.y.</b> | <b>group1</b> | <b>group2</b> | <b>n1</b> | <b>n2</b> | <b>p.adj</b> | <b>p.adj.signif</b> |
|----|--------------|------------|---------------|---------------|-----------|-----------|--------------|---------------------|
| 1  | Acomys       | score      | control       | dpi.004       | 6         | 6         | 0.042        | *                   |
| 2  | Acomys       | score      | control       | dpi.014       | 6         | 6         | 0.591        | ns                  |
| 3  | Acomys       | score      | control       | dpi.042       | 6         | 6         | 0.74         | ns                  |
| 4  | Acomys       | score      | control       | dpi.100       | 6         | 6         | 0.285        | ns                  |
| 5  | Acomys       | score      | dpi.004       | dpi.014       | 6         | 6         | 0.024        | *                   |
| 6  | Acomys       | score      | dpi.004       | dpi.042       | 6         | 6         | 0.497        | ns                  |
| 7  | Acomys       | score      | dpi.004       | dpi.100       | 6         | 6         | 0.12         | ns                  |
| 8  | Acomys       | score      | dpi.014       | dpi.042       | 6         | 6         | 1            | ns                  |
| 9  | Acomys       | score      | dpi.014       | dpi.100       | 6         | 6         | 1            | ns                  |
| 10 | Acomys       | score      | dpi.042       | dpi.100       | 6         | 6         | 1            | ns                  |
| 11 | Mus          | score      | control       | dpi.004       | 8         | 8         | 1            | ns                  |
| 12 | Mus          | score      | control       | dpi.014       | 8         | 8         | 0.046        | *                   |
| 13 | Mus          | score      | control       | dpi.042       | 8         | 8         | 1            | ns                  |
| 14 | Mus          | score      | control       | dpi.100       | 8         | 8         | 1            | ns                  |
| 15 | Mus          | score      | dpi.004       | dpi.014       | 8         | 8         | 0.002        | **                  |
| 16 | Mus          | score      | dpi.004       | dpi.042       | 8         | 8         | 1            | ns                  |
| 17 | Mus          | score      | dpi.004       | dpi.100       | 8         | 8         | 1            | ns                  |
| 18 | Mus          | score      | dpi.014       | dpi.042       | 8         | 8         | 0.042        | *                   |
| 19 | Mus          | score      | dpi.014       | dpi.100       | 8         | 8         | 0.458        | ns                  |
| 20 | Mus          | score      | dpi.042       | dpi.100       | 8         | 8         | 1            | ns                  |

**Figure 2f (Myh7 RT-qPCR)**

Two-way mixed ANOVA result

|   | <b>Effect</b> | <b>DFn</b> | <b>DFd</b> | <b>F</b> | <b>p</b> | <b>p&lt;.05</b> | <b>ges</b> |
|---|---------------|------------|------------|----------|----------|-----------------|------------|
| 1 | group         | 1          | 7          | 55.357   | 0.00014  | *               | 0.588      |
| 2 | time          | 1.41       | 9.85       | 3.304    | 0.091    |                 | 0.279      |
| 3 | group:time    | 1.41       | 9.85       | 6.399    | 0.023    | *               | 0.428      |

Simple pairwise comparison (between groups)

|   | <b>time</b> | <b>.y.</b> | <b>group1</b> | <b>group2</b> | <b>n1</b> | <b>n2</b> | <b>p</b> | <b>p.signif</b> | <b>p.adj</b> | <b>p.adj.signif</b> |
|---|-------------|------------|---------------|---------------|-----------|-----------|----------|-----------------|--------------|---------------------|
| 1 | control     | score      | Acomys        | Mus           | 6         | 8         | 1        | ns              | 1            | ns                  |
| 2 | dpi.004     | score      | Acomys        | Mus           | 6         | 8         | 0.00129  | **              | 0.00129      | **                  |
| 3 | dpi.014     | score      | Acomys        | Mus           | 6         | 8         | 0.00915  | **              | 0.00915      | **                  |
| 4 | dpi.042     | score      | Acomys        | Mus           | 6         | 8         | 0.0566   | ns              | 0.0566       | ns                  |
| 5 | dpi.100     | score      | Acomys        | Mus           | 6         | 8         | 0.00083  | ***             | 0.00083      | ***                 |

Simple pairwise comparison (within groups)

|    | <b>group</b> | <b>.y.</b> | <b>group1</b> | <b>group2</b> | <b>n1</b> | <b>n2</b> | <b>p.adj</b> | <b>p.adj.signif</b> |
|----|--------------|------------|---------------|---------------|-----------|-----------|--------------|---------------------|
| 1  | Acomys       | score      | control       | dpi.004       | 6         | 6         | 1            | ns                  |
| 2  | Acomys       | score      | control       | dpi.014       | 6         | 6         | 1            | ns                  |
| 3  | Acomys       | score      | control       | dpi.042       | 6         | 6         | 1            | ns                  |
| 4  | Acomys       | score      | control       | dpi.100       | 6         | 6         | 1            | ns                  |
| 5  | Acomys       | score      | dpi.004       | dpi.014       | 6         | 6         | 1            | ns                  |
| 6  | Acomys       | score      | dpi.004       | dpi.042       | 6         | 6         | 1            | ns                  |
| 7  | Acomys       | score      | dpi.004       | dpi.100       | 6         | 6         | 1            | ns                  |
| 8  | Acomys       | score      | dpi.014       | dpi.042       | 6         | 6         | 1            | ns                  |
| 9  | Acomys       | score      | dpi.014       | dpi.100       | 6         | 6         | 1            | ns                  |
| 10 | Acomys       | score      | dpi.042       | dpi.100       | 6         | 6         | 1            | ns                  |
| 11 | Mus          | score      | control       | dpi.004       | 8         | 8         | 0.043        | *                   |
| 12 | Mus          | score      | control       | dpi.014       | 8         | 8         | 0.442        | ns                  |
| 13 | Mus          | score      | control       | dpi.042       | 8         | 8         | 0.701        | ns                  |
| 14 | Mus          | score      | control       | dpi.100       | 8         | 8         | 0.45         | ns                  |
| 15 | Mus          | score      | dpi.004       | dpi.014       | 8         | 8         | 1            | ns                  |
| 16 | Mus          | score      | dpi.004       | dpi.042       | 8         | 8         | 1            | ns                  |
| 17 | Mus          | score      | dpi.004       | dpi.100       | 8         | 8         | 1            | ns                  |
| 18 | Mus          | score      | dpi.014       | dpi.042       | 8         | 8         | 1            | ns                  |
| 19 | Mus          | score      | dpi.014       | dpi.100       | 8         | 8         | 1            | ns                  |
| 20 | Mus          | score      | dpi.042       | dpi.100       | 8         | 8         | 1            | ns                  |

**Figure 2f (Myh10 RT-qPCR)**

Two-way mixed ANOVA result

|   | <b>Effect</b> | <b>DFn</b> | <b>DFd</b> | <b>F</b> | <b>p</b> | <b>p&lt;.05</b> | <b>ges</b> |
|---|---------------|------------|------------|----------|----------|-----------------|------------|
| 1 | group         | 1          | 7          | 52.874   | 0.00017  | *               | 0.438      |
| 2 | time          | 4          | 28         | 6.98     | 0.0005   | *               | 0.472      |
| 3 | group:time    | 4          | 28         | 10.489   | 2.54E-05 | *               | 0.573      |

Simple pairwise comparison (between groups)

|   | <b>time</b> | <b>.y.</b> | <b>group1</b> | <b>group2</b> | <b>n1</b> | <b>n2</b> | <b>p</b> | <b>p.signif</b> | <b>p.adj</b> | <b>p.adj.signif</b> |
|---|-------------|------------|---------------|---------------|-----------|-----------|----------|-----------------|--------------|---------------------|
| 1 | control     | score      | Acomys        | Mus           | 6         | 8         | 1        | ns              | 1            | ns                  |
| 2 | dpi.004     | score      | Acomys        | Mus           | 6         | 8         | 2.00E-04 | ***             | 2.00E-04     | ***                 |
| 3 | dpi.014     | score      | Acomys        | Mus           | 6         | 8         | 0.0885   | ns              | 0.0885       | ns                  |
| 4 | dpi.042     | score      | Acomys        | Mus           | 6         | 8         | 0.997    | ns              | 0.997        | ns                  |
| 5 | dpi.100     | score      | Acomys        | Mus           | 6         | 8         | 0.89     | ns              | 0.89         | ns                  |

Simple pairwise comparison (within groups)

|    | <b>group</b> | <b>.y.</b> | <b>group1</b> | <b>group2</b> | <b>n1</b> | <b>n2</b> | <b>p.adj</b> | <b>p.adj.signif</b> |
|----|--------------|------------|---------------|---------------|-----------|-----------|--------------|---------------------|
| 1  | Acomys       | score      | control       | dpi.004       | 6         | 6         | 0.56         | ns                  |
| 2  | Acomys       | score      | control       | dpi.014       | 6         | 6         | 1            | ns                  |
| 3  | Acomys       | score      | control       | dpi.042       | 6         | 6         | 0.561        | ns                  |
| 4  | Acomys       | score      | control       | dpi.100       | 6         | 6         | 0.36         | ns                  |
| 5  | Acomys       | score      | dpi.004       | dpi.014       | 6         | 6         | 1            | ns                  |
| 6  | Acomys       | score      | dpi.004       | dpi.042       | 6         | 6         | 1            | ns                  |
| 7  | Acomys       | score      | dpi.004       | dpi.100       | 6         | 6         | 0.993        | ns                  |
| 8  | Acomys       | score      | dpi.014       | dpi.042       | 6         | 6         | 1            | ns                  |
| 9  | Acomys       | score      | dpi.014       | dpi.100       | 6         | 6         | 1            | ns                  |
| 10 | Acomys       | score      | dpi.042       | dpi.100       | 6         | 6         | 1            | ns                  |
| 11 | Mus          | score      | control       | dpi.004       | 8         | 8         | 0.007        | **                  |
| 12 | Mus          | score      | control       | dpi.014       | 8         | 8         | 0.313        | ns                  |
| 13 | Mus          | score      | control       | dpi.042       | 8         | 8         | 1            | ns                  |
| 14 | Mus          | score      | control       | dpi.100       | 8         | 8         | 1            | ns                  |
| 15 | Mus          | score      | dpi.004       | dpi.014       | 8         | 8         | 0.664        | ns                  |
| 16 | Mus          | score      | dpi.004       | dpi.042       | 8         | 8         | 0.083        | ns                  |
| 17 | Mus          | score      | dpi.004       | dpi.100       | 8         | 8         | 0.544        | ns                  |
| 18 | Mus          | score      | dpi.014       | dpi.042       | 8         | 8         | 1            | ns                  |
| 19 | Mus          | score      | dpi.014       | dpi.100       | 8         | 8         | 0.656        | ns                  |
| 20 | Mus          | score      | dpi.042       | dpi.100       | 8         | 8         | 1            | ns                  |

**Figure 2f (Pfkp RT-qPCR)**

Two-way mixed ANOVA result

|   | <b>Effect</b> | <b>DFn</b> | <b>DFd</b> | <b>F</b> | <b>p</b> | <b>p&lt;.05</b> | <b>ges</b> |
|---|---------------|------------|------------|----------|----------|-----------------|------------|
| 1 | group         | 1          | 7          | 41.503   | 0.00035  | *               | 0.461      |
| 2 | time          | 4          | 28         | 4.372    | 0.007    | *               | 0.348      |
| 3 | group:time    | 4          | 28         | 4.57     | 0.006    | *               | 0.358      |

Simple pairwise comparison (between groups)

|   | <b>time</b> | <b>.y.</b> | <b>group1</b> | <b>group2</b> | <b>n1</b> | <b>n2</b> | <b>p</b> | <b>p.signif</b> | <b>p.adj</b> | <b>p.adj.signif</b> |
|---|-------------|------------|---------------|---------------|-----------|-----------|----------|-----------------|--------------|---------------------|
| 1 | control     | score      | Acomys        | Mus           | 6         | 8         | 1        | ns              | 1            | ns                  |
| 2 | dpi.004     | score      | Acomys        | Mus           | 6         | 8         | 0.00431  | **              | 0.00431      | **                  |
| 3 | dpi.014     | score      | Acomys        | Mus           | 6         | 8         | 0.00863  | **              | 0.00863      | **                  |
| 4 | dpi.042     | score      | Acomys        | Mus           | 6         | 8         | 0.313    | ns              | 0.313        | ns                  |
| 5 | dpi.100     | score      | Acomys        | Mus           | 6         | 8         | 0.253    | ns              | 0.253        | ns                  |

Simple pairwise comparison (within groups)

|    | <b>group</b> | <b>.y.</b> | <b>group1</b> | <b>group2</b> | <b>n1</b> | <b>n2</b> | <b>p.adj</b> | <b>p.adj.signif</b> |
|----|--------------|------------|---------------|---------------|-----------|-----------|--------------|---------------------|
| 1  | Acomys       | score      | control       | dpi.004       | 5         | 5         | 0.154        | ns                  |
| 2  | Acomys       | score      | control       | dpi.014       | 5         | 5         | 0.034        | *                   |
| 3  | Acomys       | score      | control       | dpi.100       | 5         | 5         | 0.011        | *                   |
| 4  | Acomys       | score      | dpi.004       | dpi.014       | 5         | 5         | 0.4          | ns                  |
| 5  | Acomys       | score      | dpi.004       | dpi.100       | 5         | 5         | 0.484        | ns                  |
| 6  | Acomys       | score      | dpi.014       | dpi.100       | 5         | 5         | 1            | ns                  |
| 7  | Mus          | score      | control       | dpi.004       | 4         | 4         | 0.00091      | ***                 |
| 8  | Mus          | score      | control       | dpi.014       | 4         | 4         | 0.011        | *                   |
| 9  | Mus          | score      | control       | dpi.100       | 4         | 4         | 0.009        | **                  |
| 10 | Mus          | score      | dpi.004       | dpi.014       | 4         | 4         | 0.086        | ns                  |
| 11 | Mus          | score      | dpi.004       | dpi.100       | 4         | 4         | 0.011        | *                   |
| 12 | Mus          | score      | dpi.014       | dpi.100       | 4         | 4         | 1            | ns                  |



**Figure 2f (Prnp RT-qPCR)**

Two-way mixed ANOVA result

|   | <b>Effect</b> | <b>DFn</b> | <b>DFd</b> | <b>F</b> | <b>p</b> | <b>p&lt;.05</b> | <b>ges</b> |
|---|---------------|------------|------------|----------|----------|-----------------|------------|
| 1 | group         | 1          | 7          | 90.278   | 2.99E-05 | *               | 0.572      |
| 2 | time          | 4          | 28         | 1.044    | 0.402    |                 | 0.118      |
| 3 | group:time    | 4          | 28         | 5.874    | 0.001    | *               | 0.429      |

Simple pairwise comparison (between groups)

|   | <b>time</b> | <b>.y.</b> | <b>group1</b> | <b>group2</b> | <b>n1</b> | <b>n2</b> | <b>p</b> | <b>p.signif</b> | <b>p.adj</b> | <b>p.adj.signif</b> |
|---|-------------|------------|---------------|---------------|-----------|-----------|----------|-----------------|--------------|---------------------|
| 1 | control     | score      | Acomys        | Mus           | 6         | 8         | 1        | ns              | 1            | ns                  |
| 2 | dpi.004     | score      | Acomys        | Mus           | 6         | 8         | 0.00025  | ***             | 0.00025      | ***                 |
| 3 | dpi.014     | score      | Acomys        | Mus           | 6         | 8         | 0.00191  | **              | 0.00191      | **                  |
| 4 | dpi.042     | score      | Acomys        | Mus           | 6         | 8         | 0.00633  | **              | 0.00633      | **                  |
| 5 | dpi.100     | score      | Acomys        | Mus           | 6         | 8         | 0.0731   | ns              | 0.0731       | ns                  |

Simple pairwise comparison (within groups)

|    | <b>group</b> | <b>.y.</b> | <b>group1</b> | <b>group2</b> | <b>n1</b> | <b>n2</b> | <b>p.adj</b> | <b>p.adj.signif</b> |
|----|--------------|------------|---------------|---------------|-----------|-----------|--------------|---------------------|
| 1  | Acomys       | score      | control       | dpi.004       | 6         | 6         | 1            | ns                  |
| 2  | Acomys       | score      | control       | dpi.014       | 6         | 6         | 1            | ns                  |
| 3  | Acomys       | score      | control       | dpi.042       | 6         | 6         | 1            | ns                  |
| 4  | Acomys       | score      | control       | dpi.100       | 6         | 6         | 1            | ns                  |
| 5  | Acomys       | score      | dpi.004       | dpi.014       | 6         | 6         | 1            | ns                  |
| 6  | Acomys       | score      | dpi.004       | dpi.042       | 6         | 6         | 1            | ns                  |
| 7  | Acomys       | score      | dpi.004       | dpi.100       | 6         | 6         | 0.493        | ns                  |
| 8  | Acomys       | score      | dpi.014       | dpi.042       | 6         | 6         | 1            | ns                  |
| 9  | Acomys       | score      | dpi.014       | dpi.100       | 6         | 6         | 1            | ns                  |
| 10 | Acomys       | score      | dpi.042       | dpi.100       | 6         | 6         | 1            | ns                  |
| 11 | Mus          | score      | control       | dpi.004       | 8         | 8         | 0.024        | *                   |
| 12 | Mus          | score      | control       | dpi.014       | 8         | 8         | 0.329        | ns                  |
| 13 | Mus          | score      | control       | dpi.042       | 8         | 8         | 0.371        | ns                  |
| 14 | Mus          | score      | control       | dpi.100       | 8         | 8         | 1            | ns                  |
| 15 | Mus          | score      | dpi.004       | dpi.014       | 8         | 8         | 1            | ns                  |
| 16 | Mus          | score      | dpi.004       | dpi.042       | 8         | 8         | 1            | ns                  |
| 17 | Mus          | score      | dpi.004       | dpi.100       | 8         | 8         | 0.011        | *                   |
| 18 | Mus          | score      | dpi.014       | dpi.042       | 8         | 8         | 1            | ns                  |
| 19 | Mus          | score      | dpi.014       | dpi.100       | 8         | 8         | 1            | ns                  |
| 20 | Mus          | score      | dpi.042       | dpi.100       | 8         | 8         | 1            | ns                  |

**Figure 2f (Sorbs2 RT-qPCR)**

Two-way mixed ANOVA result

|   | <b>Effect</b> | <b>DFn</b> | <b>DFd</b> | <b>F</b> | <b>p</b> | <b>p&lt;.05</b> | <b>ges</b> |
|---|---------------|------------|------------|----------|----------|-----------------|------------|
| 1 | group         | 1          | 7          | 63.968   | 9.13E-05 | *               | 0.525      |
| 2 | time          | 4          | 28         | 0.86     | 0.5      |                 | 0.098      |
| 3 | group:time    | 4          | 28         | 8.2      | 0.00017  | *               | 0.507      |

Simple pairwise comparison (between groups)

|   | <b>time</b> | <b>.y.</b> | <b>group1</b> | <b>group2</b> | <b>n1</b> | <b>n2</b> | <b>p</b> | <b>p.signif</b> | <b>p.adj</b> | <b>p.adj.signif</b> |
|---|-------------|------------|---------------|---------------|-----------|-----------|----------|-----------------|--------------|---------------------|
| 1 | control     | score      | Acomys        | Mus           | 6         | 8         | 1        | ns              | 1            | ns                  |
| 2 | dpi.004     | score      | Acomys        | Mus           | 6         | 8         | 0.00027  | ***             | 0.00027      | ***                 |
| 3 | dpi.014     | score      | Acomys        | Mus           | 6         | 8         | 2.36E-05 | ****            | 2.36E-05     | ****                |
| 4 | dpi.042     | score      | Acomys        | Mus           | 6         | 8         | 0.0858   | ns              | 0.0858       | ns                  |
| 5 | dpi.100     | score      | Acomys        | Mus           | 6         | 8         | 0.569    | ns              | 0.569        | ns                  |

Simple pairwise comparison (within groups)

|    | <b>group</b> | <b>.y.</b> | <b>group1</b> | <b>group2</b> | <b>n1</b> | <b>n2</b> | <b>p.adj</b> | <b>p.adj.signif</b> |
|----|--------------|------------|---------------|---------------|-----------|-----------|--------------|---------------------|
| 1  | Acomys       | score      | control       | dpi.004       | 6         | 6         | 1            | ns                  |
| 2  | Acomys       | score      | control       | dpi.014       | 6         | 6         | 0.184        | ns                  |
| 3  | Acomys       | score      | control       | dpi.042       | 6         | 6         | 1            | ns                  |
| 4  | Acomys       | score      | control       | dpi.100       | 6         | 6         | 1            | ns                  |
| 5  | Acomys       | score      | dpi.004       | dpi.014       | 6         | 6         | 1            | ns                  |
| 6  | Acomys       | score      | dpi.004       | dpi.042       | 6         | 6         | 1            | ns                  |
| 7  | Acomys       | score      | dpi.004       | dpi.100       | 6         | 6         | 1            | ns                  |
| 8  | Acomys       | score      | dpi.014       | dpi.042       | 6         | 6         | 1            | ns                  |
| 9  | Acomys       | score      | dpi.014       | dpi.100       | 6         | 6         | 0.129        | ns                  |
| 10 | Acomys       | score      | dpi.042       | dpi.100       | 6         | 6         | 1            | ns                  |
| 11 | Mus          | score      | control       | dpi.004       | 8         | 8         | 0.003        | **                  |
| 12 | Mus          | score      | control       | dpi.014       | 8         | 8         | 0.041        | *                   |
| 13 | Mus          | score      | control       | dpi.042       | 8         | 8         | 1            | ns                  |
| 14 | Mus          | score      | control       | dpi.100       | 8         | 8         | 1            | ns                  |
| 15 | Mus          | score      | dpi.004       | dpi.014       | 8         | 8         | 1            | ns                  |
| 16 | Mus          | score      | dpi.004       | dpi.042       | 8         | 8         | 0.897        | ns                  |
| 17 | Mus          | score      | dpi.004       | dpi.100       | 8         | 8         | 0.00029      | ***                 |
| 18 | Mus          | score      | dpi.014       | dpi.042       | 8         | 8         | 0.461        | ns                  |
| 19 | Mus          | score      | dpi.014       | dpi.100       | 8         | 8         | 1            | ns                  |
| 20 | Mus          | score      | dpi.042       | dpi.100       | 8         | 8         | 1            | ns                  |

**Figure 2f (Mafk RT-qPCR)**

Two-way mixed ANOVA result

|   | <b>Effect</b> | <b>DFn</b> | <b>DFd</b> | <b>F</b> | <b>p</b> | <b>p&lt;.05</b> | <b>ges</b> |
|---|---------------|------------|------------|----------|----------|-----------------|------------|
| 1 | group         | 1          | 7          | 0.368    | 0.563    |                 | 0.011      |
| 2 | time          | 2.21       | 15.46      | 6.274    | 0.009    | *               | 0.413      |
| 3 | group:time    | 2.21       | 15.46      | 4.203    | 0.032    | *               | 0.321      |

Simple pairwise comparison (between groups)

|   | <b>time</b> | <b>.y.</b> | <b>group1</b> | <b>group2</b> | <b>n1</b> | <b>n2</b> | <b>p</b> | <b>p.signif</b> | <b>p.adj</b> | <b>p.adj.signif</b> |
|---|-------------|------------|---------------|---------------|-----------|-----------|----------|-----------------|--------------|---------------------|
| 1 | control     | score      | Acomys        | Mus           | 6         | 8         | 1        | ns              | 1            | ns                  |
| 2 | dpi.004     | score      | Acomys        | Mus           | 6         | 8         | 0.0244   | *               | 0.0244       | *                   |
| 3 | dpi.014     | score      | Acomys        | Mus           | 6         | 8         | 0.00047  | ***             | 0.00047      | ***                 |
| 4 | dpi.042     | score      | Acomys        | Mus           | 6         | 8         | 0.0115   | *               | 0.0115       | *                   |
| 5 | dpi.100     | score      | Acomys        | Mus           | 6         | 8         | 0.137    | ns              | 0.137        | ns                  |

Simple pairwise comparison (within groups)

|    | <b>group</b> | <b>.y.</b> | <b>group1</b> | <b>group2</b> | <b>n1</b> | <b>n2</b> | <b>p.adj</b> | <b>p.adj.signif</b> |
|----|--------------|------------|---------------|---------------|-----------|-----------|--------------|---------------------|
| 1  | Acomys       | score      | control       | dpi.004       | 6         | 6         | 1            | ns                  |
| 2  | Acomys       | score      | control       | dpi.014       | 6         | 6         | 1            | ns                  |
| 3  | Acomys       | score      | control       | dpi.042       | 6         | 6         | 0.272        | ns                  |
| 4  | Acomys       | score      | control       | dpi.100       | 6         | 6         | 0.368        | ns                  |
| 5  | Acomys       | score      | dpi.004       | dpi.014       | 6         | 6         | 1            | ns                  |
| 6  | Acomys       | score      | dpi.004       | dpi.042       | 6         | 6         | 0.103        | ns                  |
| 7  | Acomys       | score      | dpi.004       | dpi.100       | 6         | 6         | 0.269        | ns                  |
| 8  | Acomys       | score      | dpi.014       | dpi.042       | 6         | 6         | 0.222        | ns                  |
| 9  | Acomys       | score      | dpi.014       | dpi.100       | 6         | 6         | 0.276        | ns                  |
| 10 | Acomys       | score      | dpi.042       | dpi.100       | 6         | 6         | 1            | ns                  |
| 11 | Mus          | score      | control       | dpi.004       | 8         | 8         | 0.095        | ns                  |
| 12 | Mus          | score      | control       | dpi.014       | 8         | 8         | 0.043        | *                   |
| 13 | Mus          | score      | control       | dpi.042       | 8         | 8         | 1            | ns                  |
| 14 | Mus          | score      | control       | dpi.100       | 8         | 8         | 1            | ns                  |
| 15 | Mus          | score      | dpi.004       | dpi.014       | 8         | 8         | 0.708        | ns                  |
| 16 | Mus          | score      | dpi.004       | dpi.042       | 8         | 8         | 1            | ns                  |
| 17 | Mus          | score      | dpi.004       | dpi.100       | 8         | 8         | 1            | ns                  |
| 18 | Mus          | score      | dpi.014       | dpi.042       | 8         | 8         | 0.316        | ns                  |
| 19 | Mus          | score      | dpi.014       | dpi.100       | 8         | 8         | 1            | ns                  |
| 20 | Mus          | score      | dpi.042       | dpi.100       | 8         | 8         | 1            | ns                  |

**Figure 3a (Hydroxyproline assay)**

Two-way mixed ANOVA result

|   | <b>Effect</b> | <b>DFn</b> | <b>DFd</b> | <b>F</b> | <b>p</b> | <b>p&lt;.05</b> | <b>ges</b> |
|---|---------------|------------|------------|----------|----------|-----------------|------------|
| 1 | group         | 1          | 6          | 72.244   | 0.00015  | *               | 0.496      |
| 2 | time          | 4          | 24         | 15.289   | 2.42E-06 | *               | 0.701      |
| 3 | group:time    | 4          | 24         | 4.125    | 0.011    | *               | 0.387      |

Simple pairwise comparison (between groups)

|   | <b>time</b> | <b>.y.</b> | <b>group1</b> | <b>group2</b> | <b>n1</b> | <b>n2</b> | <b>p</b> | <b>p.signif</b> | <b>p.adj</b> | <b>p.adj.signif</b> |
|---|-------------|------------|---------------|---------------|-----------|-----------|----------|-----------------|--------------|---------------------|
| 1 | control     | score      | Acomys        | Mus           | 10        | 12        | 0.586    | ns              | 0.586        | ns                  |
| 2 | dpi.004     | score      | Acomys        | Mus           | 10        | 12        | 0.73     | ns              | 0.73         | ns                  |
| 3 | dpi.014     | score      | Acomys        | Mus           | 10        | 12        | 0.0103   | *               | 0.0103       | *                   |
| 4 | dpi.042     | score      | Acomys        | Mus           | 10        | 12        | 0.0107   | *               | 0.0107       | *                   |
| 5 | dpi.100     | score      | Acomys        | Mus           | 10        | 12        | 0.00318  | **              | 0.00318      | **                  |

Simple pairwise comparison (within groups)

|    | <b>group</b> | <b>.y.</b> | <b>group1</b> | <b>group2</b> | <b>n1</b> | <b>n2</b> | <b>p.adj</b> | <b>p.adj.signif</b> |
|----|--------------|------------|---------------|---------------|-----------|-----------|--------------|---------------------|
| 1  | Acomys       | score      | control       | dpi.004       | 10        | 10        | 1            | ns                  |
| 2  | Acomys       | score      | control       | dpi.014       | 10        | 10        | 0.073        | ns                  |
| 3  | Acomys       | score      | control       | dpi.042       | 10        | 10        | 0.006        | **                  |
| 4  | Acomys       | score      | control       | dpi.100       | 10        | 10        | 0.01         | **                  |
| 5  | Acomys       | score      | dpi.004       | dpi.014       | 10        | 10        | 0.161        | ns                  |
| 6  | Acomys       | score      | dpi.004       | dpi.042       | 10        | 10        | 0.012        | *                   |
| 7  | Acomys       | score      | dpi.004       | dpi.100       | 10        | 10        | 0.053        | ns                  |
| 8  | Acomys       | score      | dpi.014       | dpi.042       | 10        | 10        | 1            | ns                  |
| 9  | Acomys       | score      | dpi.014       | dpi.100       | 10        | 10        | 1            | ns                  |
| 10 | Acomys       | score      | dpi.042       | dpi.100       | 10        | 10        | 1            | ns                  |
| 11 | Mus          | score      | control       | dpi.004       | 12        | 12        | 1            | ns                  |
| 12 | Mus          | score      | control       | dpi.014       | 12        | 12        | 0.571        | ns                  |
| 13 | Mus          | score      | control       | dpi.042       | 12        | 12        | 0.027        | *                   |
| 14 | Mus          | score      | control       | dpi.100       | 12        | 12        | 0.348        | ns                  |
| 15 | Mus          | score      | dpi.004       | dpi.014       | 12        | 12        | 0.413        | ns                  |
| 16 | Mus          | score      | dpi.004       | dpi.042       | 12        | 12        | 0.036        | *                   |
| 17 | Mus          | score      | dpi.004       | dpi.100       | 12        | 12        | 1            | ns                  |
| 18 | Mus          | score      | dpi.014       | dpi.042       | 12        | 12        | 1            | ns                  |
| 19 | Mus          | score      | dpi.014       | dpi.100       | 12        | 12        | 1            | ns                  |
| 20 | Mus          | score      | dpi.042       | dpi.100       | 12        | 12        | 1            | ns                  |

**Figure 3b (TNBSA assay)**

**Two-way mixed ANOVA result**

|   | Effect     | DFn | DFd  | F      | p       | p<.05 | ges   |
|---|------------|-----|------|--------|---------|-------|-------|
| 1 | group      | 1   | 7    | 45.852 | 0.00026 | *     | 0.386 |
| 2 | time       | 1.3 | 9.13 | 7.665  | 0.017   | *     | 0.497 |
| 3 | group:time | 1.3 | 9.13 | 1.089  | 0.345   |       | 0.123 |

**Simple pairwise comparison (between groups)**

|   | time    | .y.   | group1 | group2 | n1 | n2 | p       | p.signif | p.adj   | p.adj.signif |
|---|---------|-------|--------|--------|----|----|---------|----------|---------|--------------|
| 1 | control | score | Acomys | Mus    | 10 | 11 | 1       | ns       | 1       | ns           |
| 2 | dpi.004 | score | Acomys | Mus    | 10 | 11 | 0.0111  | *        | 0.0111  | *            |
| 3 | dpi.014 | score | Acomys | Mus    | 10 | 11 | 0.00556 | **       | 0.00556 | **           |
| 4 | dpi.100 | score | Acomys | Mus    | 10 | 11 | 0.00823 | **       | 0.00823 | **           |

**Simple pairwise comparison (within groups)**

|    | group  | .y.   | group1  | group2  | n1 | n2 | p.adj | p.adj.signif |
|----|--------|-------|---------|---------|----|----|-------|--------------|
| 1  | Acomys | score | control | dpi.004 | 10 | 10 | 1     | ns           |
| 2  | Acomys | score | control | dpi.014 | 10 | 10 | 0.071 | ns           |
| 3  | Acomys | score | control | dpi.100 | 10 | 10 | 0.036 | *            |
| 4  | Acomys | score | dpi.004 | dpi.014 | 10 | 10 | 0.279 | ns           |
| 5  | Acomys | score | dpi.004 | dpi.100 | 10 | 10 | 0.108 | ns           |
| 6  | Acomys | score | dpi.014 | dpi.100 | 10 | 10 | 0.445 | ns           |
| 7  | Mus    | score | control | dpi.004 | 11 | 11 | 1     | ns           |
| 8  | Mus    | score | control | dpi.014 | 11 | 11 | 1     | ns           |
| 9  | Mus    | score | control | dpi.100 | 11 | 11 | 0.221 | ns           |
| 10 | Mus    | score | dpi.004 | dpi.014 | 11 | 11 | 0.113 | ns           |
| 11 | Mus    | score | dpi.004 | dpi.100 | 11 | 11 | 0.42  | ns           |
| 12 | Mus    | score | dpi.014 | dpi.100 | 11 | 11 | 1     | ns           |

**Figure 3c (Birefringence 14 dpi)**

Two-way mixed ANOVA result

|   | <b>Effect</b> | <b>DFn</b> | <b>DFd</b> | <b>F</b> | <b>p</b> | <b>p&lt;.05</b> | <b>ges</b> |
|---|---------------|------------|------------|----------|----------|-----------------|------------|
| 1 | group         | 1          | 8          | 4.40E-18 | 1        |                 | 9.63E-32   |
| 2 | time          | 3          | 24         | 64.027   | 1.35E-11 | *               | 0.889      |
| 3 | group:time    | 3          | 24         | 0.106    | 0.956    |                 | 0.013      |

Simple pairwise comparison (between groups)

|   | <b>time</b> | <b>.y.</b> | <b>group1</b> | <b>group2</b> | <b>n1</b> | <b>n2</b> | <b>p</b> | <b>p.signif</b> | <b>p.adj</b> | <b>p.adj.signif</b> |
|---|-------------|------------|---------------|---------------|-----------|-----------|----------|-----------------|--------------|---------------------|
| 1 | a.red       | score      | Acomys        | Mus           | 6         | 4         | 7.45E-01 | ns              | 0.745        | ns                  |
| 2 | b.orange    | score      | Acomys        | Mus           | 6         | 4         | 0.514    | ns              | 0.514        | ns                  |
| 3 | c.yellow    | score      | Acomys        | Mus           | 6         | 4         | 0.955    | ns              | 0.955        | ns                  |
| 4 | d.green     | score      | Acomys        | Mus           | 6         | 4         | 0.798    | ns              | 0.798        | ns                  |

Simple pairwise comparison (within groups)

|    | <b>group</b> | <b>.y.</b> | <b>group1</b> | <b>group2</b> | <b>n1</b> | <b>n2</b> | <b>p.adj</b> | <b>p.adj.signif</b> |
|----|--------------|------------|---------------|---------------|-----------|-----------|--------------|---------------------|
| 1  | Acomys       | score      | a.red         | b.orange      | 6         | 6         | 9.00E-03     | **                  |
| 2  | Acomys       | score      | a.red         | c.yellow      | 6         | 6         | 0.016        | *                   |
| 3  | Acomys       | score      | a.red         | d.green       | 6         | 6         | 0.00055      | ***                 |
| 4  | Acomys       | score      | b.orange      | c.yellow      | 6         | 6         | 0.131        | ns                  |
| 5  | Acomys       | score      | b.orange      | d.green       | 6         | 6         | 0.0004       | ***                 |
| 6  | Acomys       | score      | c.yellow      | d.green       | 6         | 6         | 0.491        | ns                  |
| 7  | Mus          | score      | a.red         | b.orange      | 4         | 4         | 1            | ns                  |
| 8  | Mus          | score      | a.red         | c.yellow      | 4         | 4         | 0.137        | ns                  |
| 9  | Mus          | score      | a.red         | d.green       | 4         | 4         | 0.031        | *                   |
| 10 | Mus          | score      | b.orange      | c.yellow      | 4         | 4         | 0.032        | *                   |
| 11 | Mus          | score      | b.orange      | d.green       | 4         | 4         | 0.018        | *                   |
| 12 | Mus          | score      | c.yellow      | d.green       | 4         | 4         | 0.205        | ns                  |

**Figure 3c (Birefringence 100 dpi)**

Two-way mixed ANOVA result

|   | <b>Effect</b> | <b>DFn</b> | <b>DFd</b> | <b>F</b> | <b>p</b> | <b>p&lt;.05</b> | <b>ges</b> |
|---|---------------|------------|------------|----------|----------|-----------------|------------|
| 1 | group         | 1          | 6          | 5.04E-01 | 0.504    |                 | 3.42E-15   |
| 2 | time          | 1.05       | 6.3        | 507.543  | 2.72E-07 | *               | 0.988      |
| 3 | group:time    | 1.05       | 6.3        | 15.59    | 0.007    | *               | 0.722      |

Simple pairwise comparison (between groups)

|   | <b>time</b> | <b>.y.</b> | <b>group1</b> | <b>group2</b> | <b>n1</b> | <b>n2</b> | <b>p</b> | <b>p.signif</b> | <b>p.adj</b> | <b>p.adj.signif</b> |
|---|-------------|------------|---------------|---------------|-----------|-----------|----------|-----------------|--------------|---------------------|
| 1 | a.red       | score      | Acomys        | Mus           | 4         | 4         | 7.15E-03 | **              | 0.00715      | **                  |
| 2 | b.orange    | score      | Acomys        | Mus           | 4         | 4         | 0.00365  | **              | 0.00365      | **                  |
| 3 | c.yellow    | score      | Acomys        | Mus           | 4         | 4         | 0.0583   | ns              | 0.0583       | ns                  |
| 4 | d.green     | score      | Acomys        | Mus           | 4         | 4         | 0.00282  | **              | 0.00282      | **                  |

Simple pairwise comparison (within groups)

|    | <b>group</b> | <b>.y.</b> | <b>group1</b> | <b>group2</b> | <b>n1</b> | <b>n2</b> | <b>p.adj</b> | <b>p.adj.signif</b> |
|----|--------------|------------|---------------|---------------|-----------|-----------|--------------|---------------------|
| 1  | Acomys       | score      | a.red         | b.orange      | 4         | 4         | 9.24E-04     | ***                 |
| 2  | Acomys       | score      | a.red         | c.yellow      | 4         | 4         | 0.001        | **                  |
| 3  | Acomys       | score      | a.red         | d.green       | 4         | 4         | 0.00046      | ***                 |
| 4  | Acomys       | score      | b.orange      | c.yellow      | 4         | 4         | 0.064        | ns                  |
| 5  | Acomys       | score      | b.orange      | d.green       | 4         | 4         | 0.006        | **                  |
| 6  | Acomys       | score      | c.yellow      | d.green       | 4         | 4         | 0.03         | *                   |
| 7  | Mus          | score      | a.red         | b.orange      | 4         | 4         | 0.013        | *                   |
| 8  | Mus          | score      | a.red         | c.yellow      | 4         | 4         | 0.011        | *                   |
| 9  | Mus          | score      | a.red         | d.green       | 4         | 4         | 0.006        | **                  |
| 10 | Mus          | score      | b.orange      | c.yellow      | 4         | 4         | 0.008        | **                  |
| 11 | Mus          | score      | b.orange      | d.green       | 4         | 4         | 0.022        | *                   |
| 12 | Mus          | score      | c.yellow      | d.green       | 4         | 4         | 0.175        | ns                  |

### Figure 3e (Waviness index)

Two-way mixed ANOVA result

|   | <b>Effect</b> | <b>DFn</b> | <b>DFd</b> | <b>F</b> | <b>p</b> | <b>p&lt;.05</b> | <b>ges</b> |
|---|---------------|------------|------------|----------|----------|-----------------|------------|
| 1 | group         | 1          | 6          | 1.09E+01 | 1.60E-02 | *               | 4.39E-01   |
| 2 | time          | 1          | 6          | 0.054    | 8.25E-01 |                 | 0.005      |
| 3 | group:time    | 1          | 6          | 1.905    | 0.217    |                 | 1.53E-01   |

Simple pairwise comparison (between groups)

|   | <b>time</b> | <b>.y.</b> | <b>group1</b> | <b>group2</b> | <b>n1</b> | <b>n2</b> | <b>p</b> | <b>p.signif</b> | <b>p.adj</b> | <b>p.adj.signif</b> |
|---|-------------|------------|---------------|---------------|-----------|-----------|----------|-----------------|--------------|---------------------|
| 1 | dpi.014     | score      | Acomys        | Mus           | 4         | 4         | 2.66E-03 | **              | 0.00266      | **                  |
| 2 | dpi.100     | score      | Acomys        | Mus           | 4         | 4         | 0.404    | ns              | 0.404        | ns                  |

Simple pairwise comparison (within groups)

|   | <b>group</b> | <b>.y.</b> | <b>group1</b> | <b>group2</b> | <b>n1</b> | <b>n2</b> | <b>p.adj</b> | <b>p.adj.signif</b> |
|---|--------------|------------|---------------|---------------|-----------|-----------|--------------|---------------------|
| 1 | Acomys       | score      | dpi.014       | dpi.100       | 4         | 4         | 5.54E-01     | ns                  |
| 2 | Mus          | score      | dpi.014       | dpi.100       | 4         | 4         | 0.207        | ns                  |



**Figure 4I (MLC2v pHis immuno)**

Two-way mixed ANOVA result

|   | <b>Effect</b> | <b>DFn</b> | <b>DFd</b> | <b>F</b> | <b>p</b> | <b>p&lt;.05</b> | <b>ges</b> |
|---|---------------|------------|------------|----------|----------|-----------------|------------|
| 1 | group         | 1          | 6          | 6.091    | 0.049    | *               | 0.337      |
| 2 | time          | 3          | 18         | 14.206   | 5.41E-05 | *               | 0.542      |
| 3 | group:time    | 3          | 18         | 3.01     | 0.057    |                 | 0.2        |

Simple pairwise comparison (between groups)

|   | <b>time</b> | <b>.y.</b> | <b>group1</b> | <b>group2</b> | <b>n1</b> | <b>n2</b> | <b>p</b> | <b>p.signif</b> | <b>p.adj</b> | <b>p.adj.signif</b> |
|---|-------------|------------|---------------|---------------|-----------|-----------|----------|-----------------|--------------|---------------------|
| 1 | control     | score      | Acomys        | Mus           | 5         | 4         | 0.87     | ns              | 0.87         | ns                  |
| 2 | dpi.014     | score      | Acomys        | Mus           | 5         | 4         | 0.0543   | ns              | 0.0543       | ns                  |
| 3 | dpi.042     | score      | Acomys        | Mus           | 5         | 4         | 0.0568   | ns              | 0.0568       | ns                  |
| 4 | dpi.100     | score      | Acomys        | Mus           | 5         | 4         | 0.234    | ns              | 0.234        | ns                  |

Simple pairwise comparison (within groups)

|    | <b>group</b> | <b>.y.</b> | <b>group1</b> | <b>group2</b> | <b>n1</b> | <b>n2</b> | <b>p.adj</b> | <b>p.adj.signif</b> |
|----|--------------|------------|---------------|---------------|-----------|-----------|--------------|---------------------|
| 1  | Acomys       | score      | control       | dpi.014       | 5         | 5         | 0.223        | ns                  |
| 2  | Acomys       | score      | control       | dpi.042       | 5         | 5         | 0.09         | ns                  |
| 3  | Acomys       | score      | control       | dpi.100       | 5         | 5         | 0.4          | ns                  |
| 4  | Acomys       | score      | dpi.014       | dpi.042       | 5         | 5         | 1            | ns                  |
| 5  | Acomys       | score      | dpi.014       | dpi.100       | 5         | 5         | 0.397        | ns                  |
| 6  | Acomys       | score      | dpi.042       | dpi.100       | 5         | 5         | 0.037        | *                   |
| 7  | Mus          | score      | control       | dpi.014       | 4         | 4         | 0.065        | ns                  |
| 8  | Mus          | score      | control       | dpi.042       | 4         | 4         | 0.347        | ns                  |
| 9  | Mus          | score      | control       | dpi.100       | 4         | 4         | 0.84         | ns                  |
| 10 | Mus          | score      | dpi.014       | dpi.042       | 4         | 4         | 1            | ns                  |
| 11 | Mus          | score      | dpi.014       | dpi.100       | 4         | 4         | 1            | ns                  |
| 12 | Mus          | score      | dpi.042       | dpi.100       | 4         | 4         | 1            | ns                  |

**Figure 5a (pHis ERG immuno)**

Two-way mixed ANOVA result

|   | <b>Effect</b> | <b>DFn</b> | <b>DFd</b> | <b>F</b> | <b>p</b> | <b>p&lt;.05</b> | <b>ges</b> |
|---|---------------|------------|------------|----------|----------|-----------------|------------|
| 1 | group         | 1          | 5          | 8.57     | 0.033    | *               | 0.368      |
| 2 | time          | 4          | 20         | 16.09    | 4.84E-06 | *               | 0.68       |
| 3 | group:time    | 4          | 20         | 4.974    | 0.006    | *               | 0.397      |

Simple pairwise comparison (between groups)

|   | <b>time</b> | <b>.y.</b> | <b>group1</b> | <b>group2</b> | <b>n1</b> | <b>n2</b> | <b>p</b> | <b>p.signif</b> | <b>p.adj</b> | <b>p.adj.signif</b> |
|---|-------------|------------|---------------|---------------|-----------|-----------|----------|-----------------|--------------|---------------------|
| 1 | dpi.004     | score      | Acomys        | Mus           | 5         | 4         | 0.264    | ns              | 0.264        | ns                  |
| 2 | dpi.014     | score      | Acomys        | Mus           | 5         | 4         | 0.138    | ns              | 0.138        | ns                  |
| 3 | dpi.042     | score      | Acomys        | Mus           | 5         | 4         | 0.0122   | *               | 0.0122       | *                   |
| 4 | dpi.100     | score      | Acomys        | Mus           | 5         | 4         | 0.00486  | **              | 0.00486      | **                  |

Simple pairwise comparison (within groups)

|    | <b>group</b> | <b>.y.</b> | <b>group1</b> | <b>group2</b> | <b>n1</b> | <b>n2</b> | <b>p.adj</b> | <b>p.adj.signif</b> |
|----|--------------|------------|---------------|---------------|-----------|-----------|--------------|---------------------|
| 1  | Acomys       | score      | control       | dpi.004       | 5         | 5         | 0.159        | ns                  |
| 2  | Acomys       | score      | control       | dpi.014       | 5         | 5         | 0.011        | *                   |
| 3  | Acomys       | score      | control       | dpi.042       | 5         | 5         | 0.261        | ns                  |
| 4  | Acomys       | score      | control       | dpi.100       | 5         | 5         | 0.025        | *                   |
| 5  | Acomys       | score      | dpi.004       | dpi.014       | 5         | 5         | 0.083        | ns                  |
| 6  | Acomys       | score      | dpi.004       | dpi.042       | 5         | 5         | 1            | ns                  |
| 7  | Acomys       | score      | dpi.004       | dpi.100       | 5         | 5         | 1            | ns                  |
| 8  | Acomys       | score      | dpi.014       | dpi.042       | 5         | 5         | 0.502        | ns                  |
| 9  | Acomys       | score      | dpi.014       | dpi.100       | 5         | 5         | 0.156        | ns                  |
| 10 | Acomys       | score      | dpi.042       | dpi.100       | 5         | 5         | 0.974        | ns                  |
| 11 | Mus          | score      | control       | dpi.004       | 4         | 4         | 0.104        | ns                  |
| 12 | Mus          | score      | control       | dpi.014       | 4         | 4         | 0.549        | ns                  |
| 13 | Mus          | score      | control       | dpi.042       | 4         | 4         | 0.236        | ns                  |
| 14 | Mus          | score      | control       | dpi.100       | 4         | 4         | 0.803        | ns                  |
| 15 | Mus          | score      | dpi.004       | dpi.014       | 4         | 4         | 0.272        | ns                  |
| 16 | Mus          | score      | dpi.004       | dpi.042       | 4         | 4         | 0.28         | ns                  |
| 17 | Mus          | score      | dpi.004       | dpi.100       | 4         | 4         | 0.28         | ns                  |
| 18 | Mus          | score      | dpi.014       | dpi.042       | 4         | 4         | 1            | ns                  |
| 19 | Mus          | score      | dpi.014       | dpi.100       | 4         | 4         | 1            | ns                  |
| 20 | Mus          | score      | dpi.042       | dpi.100       | 4         | 4         | 1            | ns                  |

**Figure 5c (aSMA immuno)**

Two-way mixed ANOVA result

|   | <b>Effect</b> | <b>DFn</b> | <b>DFd</b> | <b>F</b> | <b>p</b> | <b>p&lt;.05</b> | <b>ges</b> |
|---|---------------|------------|------------|----------|----------|-----------------|------------|
| 1 | group         | 1          | 4          | 9.571    | 0.036    | *               | 0.289      |
| 2 | time          | 3          | 12         | 8.563    | 0.003    | *               | 0.64       |
| 3 | group:time    | 3          | 12         | 4.449    | 0.025    | *               | 0.48       |

Simple pairwise comparison (between groups)

|   | <b>time</b> | <b>.y.</b> | <b>group1</b> | <b>group2</b> | <b>n1</b> | <b>n2</b> | <b>p</b> | <b>p.signif</b> | <b>p.adj</b> | <b>p.adj.signif</b> |
|---|-------------|------------|---------------|---------------|-----------|-----------|----------|-----------------|--------------|---------------------|
| 1 | dpi.014     | score      | Acomys        | Mus           | 4         | 3         | 0.142    | ns              | 0.142        | ns                  |
| 2 | dpi.042     | score      | Acomys        | Mus           | 4         | 3         | 0.00232  | **              | 0.00232      | **                  |
| 3 | dpi.100     | score      | Acomys        | Mus           | 4         | 3         | 0.0913   | ns              | 0.0913       | ns                  |

Simple pairwise comparison (within groups)

|    | <b>group</b> | <b>.y.</b> | <b>group1</b> | <b>group2</b> | <b>n1</b> | <b>n2</b> | <b>p.adj</b> | <b>p.adj.signif</b> |
|----|--------------|------------|---------------|---------------|-----------|-----------|--------------|---------------------|
| 1  | Acomys       | score      | control       | dpi.014       | 4         | 4         | 0.113        | ns                  |
| 2  | Acomys       | score      | control       | dpi.042       | 4         | 4         | 0.025        | *                   |
| 3  | Acomys       | score      | control       | dpi.100       | 4         | 4         | 0.59         | ns                  |
| 4  | Acomys       | score      | dpi.014       | dpi.042       | 4         | 4         | 0.02         | *                   |
| 5  | Acomys       | score      | dpi.014       | dpi.100       | 4         | 4         | 0.84         | ns                  |
| 6  | Acomys       | score      | dpi.042       | dpi.100       | 4         | 4         | 1            | ns                  |
| 7  | Mus          | score      | control       | dpi.014       | 3         | 3         | 0.442        | ns                  |
| 8  | Mus          | score      | control       | dpi.042       | 3         | 3         | 0.08         | ns                  |
| 9  | Mus          | score      | control       | dpi.100       | 3         | 3         | 0.224        | ns                  |
| 10 | Mus          | score      | dpi.014       | dpi.042       | 3         | 3         | 1            | ns                  |
| 11 | Mus          | score      | dpi.014       | dpi.100       | 3         | 3         | 1            | ns                  |
| 12 | Mus          | score      | dpi.042       | dpi.100       | 3         | 3         | 1            | ns                  |

## Supplementary Figure 2b (Injured area)

Two-way mixed ANOVA result

|   | <b>Effect</b> | <b>DFn</b> | <b>DFd</b> | <b>F</b> | <b>p</b> | <b>p&lt;.05</b> | <b>ges</b> |
|---|---------------|------------|------------|----------|----------|-----------------|------------|
| 1 | group         | 1          | 6          | 0.803    | 0.405    |                 | 0.018      |
| 2 | time          | 1.25       | 7.5        | 23.201   | 0.001    | *               | 0.769      |
| 3 | group:time    | 1.25       | 7.5        | 0.618    | 0.491    |                 | 0.081      |

Simple pairwise comparison (between groups)

|   | <b>time</b> | <b>.y.</b> | <b>group1</b> | <b>group2</b> | <b>n1</b> | <b>n2</b> | <b>p</b> | <b>p.signif</b> | <b>p.adj</b> | <b>p.adj.signif</b> |
|---|-------------|------------|---------------|---------------|-----------|-----------|----------|-----------------|--------------|---------------------|
| 1 | control     | score      | Acomys        | Mus           | 4         | 4         | 0.927    | ns              | 0.927        | ns                  |
| 2 | dpi.004     | score      | Acomys        | Mus           | 4         | 4         | 0.672    | ns              | 0.672        | ns                  |
| 3 | dpi.014     | score      | Acomys        | Mus           | 4         | 4         | 0.0347   | *               | 0.0347       | *                   |
| 4 | dpi.042     | score      | Acomys        | Mus           | 4         | 4         | 0.178    | ns              | 0.178        | ns                  |
| 5 | dpi.100     | score      | Acomys        | Mus           | 4         | 4         | 0.0819   | ns              | 0.0819       | ns                  |

Simple pairwise comparison (within groups)

|    | <b>group</b> | <b>.y.</b> | <b>group1</b> | <b>group2</b> | <b>n1</b> | <b>n2</b> | <b>p.adj</b> | <b>p.adj.signif</b> |
|----|--------------|------------|---------------|---------------|-----------|-----------|--------------|---------------------|
| 1  | Acomys       | score      | control       | dpi.004       | 4         | 4         | 0.325        | ns                  |
| 2  | Acomys       | score      | control       | dpi.014       | 4         | 4         | 0.241        | ns                  |
| 3  | Acomys       | score      | control       | dpi.042       | 4         | 4         | 0.41         | ns                  |
| 4  | Acomys       | score      | control       | dpi.100       | 4         | 4         | 0.538        | ns                  |
| 5  | Acomys       | score      | dpi.004       | dpi.014       | 4         | 4         | 0.617        | ns                  |
| 6  | Acomys       | score      | dpi.004       | dpi.042       | 4         | 4         | 0.54         | ns                  |
| 7  | Acomys       | score      | dpi.004       | dpi.100       | 4         | 4         | 0.533        | ns                  |
| 8  | Acomys       | score      | dpi.014       | dpi.042       | 4         | 4         | 1            | ns                  |
| 9  | Acomys       | score      | dpi.014       | dpi.100       | 4         | 4         | 1            | ns                  |
| 10 | Acomys       | score      | dpi.042       | dpi.100       | 4         | 4         | 1            | ns                  |
| 11 | Mus          | score      | control       | dpi.004       | 4         | 4         | 0.135        | ns                  |
| 12 | Mus          | score      | control       | dpi.014       | 4         | 4         | 0.05         | ns                  |
| 13 | Mus          | score      | control       | dpi.042       | 4         | 4         | 0.162        | ns                  |
| 14 | Mus          | score      | control       | dpi.100       | 4         | 4         | 0.04         | *                   |
| 15 | Mus          | score      | dpi.004       | dpi.014       | 4         | 4         | 0.489        | ns                  |
| 16 | Mus          | score      | dpi.004       | dpi.042       | 4         | 4         | 0.251        | ns                  |
| 17 | Mus          | score      | dpi.004       | dpi.100       | 4         | 4         | 0.439        | ns                  |
| 18 | Mus          | score      | dpi.014       | dpi.042       | 4         | 4         | 1            | ns                  |
| 19 | Mus          | score      | dpi.014       | dpi.100       | 4         | 4         | 1            | ns                  |
| 20 | Mus          | score      | dpi.042       | dpi.100       | 4         | 4         | 1            | ns                  |

**Supplementary Figure 2e (Ejection fraction)**

Two-way mixed ANOVA result

|   | <b>Effect</b> | <b>DFn</b> | <b>DFd</b> | <b>F</b> | <b>p</b> | <b>p&lt;.05</b> | <b>ges</b> |
|---|---------------|------------|------------|----------|----------|-----------------|------------|
| 1 | group         | 1          | 6          | 4.825    | 0.07     |                 | 0.104      |
| 2 | time          | 4          | 24         | 3.314    | 0.027    | *               | 0.321      |
| 3 | group:time    | 4          | 24         | 1.254    | 0.315    |                 | 0.152      |

Simple pairwise comparison (between groups)

|   | <b>time</b> | <b>.y.</b> | <b>group1</b> | <b>group2</b> | <b>n1</b> | <b>n2</b> | <b>p</b> | <b>p.signif</b> | <b>p.adj</b> | <b>p.adj.signif</b> |
|---|-------------|------------|---------------|---------------|-----------|-----------|----------|-----------------|--------------|---------------------|
| 1 | control     | score      | Acomys        | Mus           | 15        | 14        | 0.541    | ns              | 0.541        | ns                  |
| 2 | dpi.004     | score      | Acomys        | Mus           | 15        | 14        | 0.00772  | **              | 0.00772      | **                  |
| 3 | dpi.014     | score      | Acomys        | Mus           | 15        | 14        | 1.31E-05 | ****            | 1.31E-05     | ****                |
| 4 | dpi.042     | score      | Acomys        | Mus           | 15        | 14        | 3.33E-10 | ****            | 3.33E-10     | ****                |
| 5 | dpi.100     | score      | Acomys        | Mus           | 15        | 14        | 8.24E-11 | ****            | 8.24E-11     | ****                |

Simple pairwise comparison (within groups)

|    | <b>group</b> | <b>.y.</b> | <b>group1</b> | <b>group2</b> | <b>n1</b> | <b>n2</b> | <b>p.adj</b> | <b>p.adj.signif</b> |
|----|--------------|------------|---------------|---------------|-----------|-----------|--------------|---------------------|
| 1  | Acomys       | score      | control       | dpi.004       | 15        | 15        | 1            | ns                  |
| 2  | Acomys       | score      | control       | dpi.014       | 15        | 15        | 1            | ns                  |
| 3  | Acomys       | score      | control       | dpi.042       | 15        | 15        | 1            | ns                  |
| 4  | Acomys       | score      | control       | dpi.100       | 15        | 15        | 1            | ns                  |
| 5  | Acomys       | score      | dpi.004       | dpi.014       | 15        | 15        | 1            | ns                  |
| 6  | Acomys       | score      | dpi.004       | dpi.042       | 15        | 15        | 1            | ns                  |
| 7  | Acomys       | score      | dpi.004       | dpi.100       | 15        | 15        | 1            | ns                  |
| 8  | Acomys       | score      | dpi.014       | dpi.042       | 15        | 15        | 1            | ns                  |
| 9  | Acomys       | score      | dpi.014       | dpi.100       | 15        | 15        | 1            | ns                  |
| 10 | Acomys       | score      | dpi.042       | dpi.100       | 15        | 15        | 1            | ns                  |
| 11 | Mus          | score      | control       | dpi.004       | 14        | 14        | 0.285        | ns                  |
| 12 | Mus          | score      | control       | dpi.014       | 14        | 14        | 0.094        | ns                  |
| 13 | Mus          | score      | control       | dpi.042       | 14        | 14        | 0.26         | ns                  |
| 14 | Mus          | score      | control       | dpi.100       | 14        | 14        | 0.42         | ns                  |
| 15 | Mus          | score      | dpi.004       | dpi.014       | 14        | 14        | 1            | ns                  |
| 16 | Mus          | score      | dpi.004       | dpi.042       | 14        | 14        | 0.336        | ns                  |
| 17 | Mus          | score      | dpi.004       | dpi.100       | 14        | 14        | 1            | ns                  |
| 18 | Mus          | score      | dpi.014       | dpi.042       | 14        | 14        | 1            | ns                  |
| 19 | Mus          | score      | dpi.014       | dpi.100       | 14        | 14        | 0.193        | ns                  |
| 20 | Mus          | score      | dpi.042       | dpi.100       | 14        | 14        | 0.738        | ns                  |

## Supplementary Figure 2e (Fractional shortening)

Two-way mixed ANOVA result

|   | <b>Effect</b> | <b>DFn</b> | <b>DFd</b> | <b>F</b> | <b>p</b> | <b>p&lt;.05</b> | <b>ges</b> |
|---|---------------|------------|------------|----------|----------|-----------------|------------|
| 1 | group         | 1          | 6          | 2.465    | 0.167    |                 | 0.116      |
| 2 | time          | 4          | 24         | 7.85     | 0.00034  | *               | 0.471      |
| 3 | group:time    | 4          | 24         | 1.931    | 0.138    |                 | 0.18       |

Simple pairwise comparison (between groups)

|   | <b>time</b> | <b>.y.</b> | <b>group1</b> | <b>group2</b> | <b>n1</b> | <b>n2</b> | <b>p</b> | <b>p.signif</b> | <b>p.adj</b> | <b>p.adj.signif</b> |
|---|-------------|------------|---------------|---------------|-----------|-----------|----------|-----------------|--------------|---------------------|
| 1 | control     | score      | Acomys        | Mus           | 15        | 14        | 0.496    | ns              | 0.496        | ns                  |
| 2 | dpi.004     | score      | Acomys        | Mus           | 15        | 14        | 0.396    | ns              | 0.396        | ns                  |
| 3 | dpi.014     | score      | Acomys        | Mus           | 15        | 14        | 0.0316   | *               | 0.0316       | *                   |
| 4 | dpi.042     | score      | Acomys        | Mus           | 15        | 14        | 0.0613   | ns              | 0.0613       | ns                  |
| 5 | dpi.100     | score      | Acomys        | Mus           | 15        | 14        | 0.336    | ns              | 0.336        | ns                  |

Simple pairwise comparison (within groups)

|    | <b>group</b> | <b>.y.</b> | <b>group1</b> | <b>group2</b> | <b>n1</b> | <b>n2</b> | <b>p.adj</b> | <b>p.adj.signif</b> |
|----|--------------|------------|---------------|---------------|-----------|-----------|--------------|---------------------|
| 1  | Acomys       | score      | control       | dpi.004       | 15        | 15        | 1            | ns                  |
| 2  | Acomys       | score      | control       | dpi.014       | 15        | 15        | 1            | ns                  |
| 3  | Acomys       | score      | control       | dpi.042       | 15        | 15        | 1            | ns                  |
| 4  | Acomys       | score      | control       | dpi.100       | 15        | 15        | 1            | ns                  |
| 5  | Acomys       | score      | dpi.004       | dpi.014       | 15        | 15        | 1            | ns                  |
| 6  | Acomys       | score      | dpi.004       | dpi.042       | 15        | 15        | 1            | ns                  |
| 7  | Acomys       | score      | dpi.004       | dpi.100       | 15        | 15        | 1            | ns                  |
| 8  | Acomys       | score      | dpi.014       | dpi.042       | 15        | 15        | 1            | ns                  |
| 9  | Acomys       | score      | dpi.014       | dpi.100       | 15        | 15        | 1            | ns                  |
| 10 | Acomys       | score      | dpi.042       | dpi.100       | 15        | 15        | 1            | ns                  |
| 11 | Mus          | score      | control       | dpi.004       | 14        | 14        | 0.015        | *                   |
| 12 | Mus          | score      | control       | dpi.014       | 14        | 14        | 0.054        | ns                  |
| 13 | Mus          | score      | control       | dpi.042       | 14        | 14        | 0.079        | ns                  |
| 14 | Mus          | score      | control       | dpi.100       | 14        | 14        | 0.092        | ns                  |
| 15 | Mus          | score      | dpi.004       | dpi.014       | 14        | 14        | 1            | ns                  |
| 16 | Mus          | score      | dpi.004       | dpi.042       | 14        | 14        | 1            | ns                  |
| 17 | Mus          | score      | dpi.004       | dpi.100       | 14        | 14        | 1            | ns                  |
| 18 | Mus          | score      | dpi.014       | dpi.042       | 14        | 14        | 1            | ns                  |
| 19 | Mus          | score      | dpi.014       | dpi.100       | 14        | 14        | 0.154        | ns                  |
| 20 | Mus          | score      | dpi.042       | dpi.100       | 14        | 14        | 0.483        | ns                  |

**Supplementary Figure 2g (Q amplitude)**

Two-way mixed ANOVA result

|   | <b>Effect</b> | <b>DFn</b> | <b>DFd</b> | <b>F</b> | <b>p</b> | <b>p&lt;.05</b> | <b>ges</b> |
|---|---------------|------------|------------|----------|----------|-----------------|------------|
| 1 | group         | 1          | 6          | 8.397    | 0.027    | *               | 0.301      |
| 2 | time          | 1.35       | 8.13       | 2.467    | 0.152    |                 | 0.221      |
| 3 | group:time    | 1.35       | 8.13       | 2.947    | 0.119    |                 | 0.254      |

Simple pairwise comparison (between groups)

|   | <b>time</b> | <b>.y.</b> | <b>group1</b> | <b>group2</b> | <b>n1</b> | <b>n2</b> | <b>p</b> | <b>p.signif</b> | <b>p.adj</b> | <b>p.adj.signif</b> |
|---|-------------|------------|---------------|---------------|-----------|-----------|----------|-----------------|--------------|---------------------|
| 1 | control     | score      | Acomys        | Mus           | 15        | 14        | 7.84E-06 | ****            | 7.84E-06     | ****                |
| 2 | dpi.004     | score      | Acomys        | Mus           | 15        | 14        | 0.738    | ns              | 0.738        | ns                  |
| 3 | dpi.014     | score      | Acomys        | Mus           | 15        | 14        | 0.00343  | **              | 0.00343      | **                  |
| 4 | dpi.042     | score      | Acomys        | Mus           | 15        | 14        | 0.00025  | ***             | 0.00025      | ***                 |
| 5 | dpi.100     | score      | Acomys        | Mus           | 15        | 14        | 0.00013  | ***             | 0.00013      | ***                 |

Simple pairwise comparison (within groups)

|    | <b>group</b> | <b>.y.</b> | <b>group1</b> | <b>group2</b> | <b>n1</b> | <b>n2</b> | <b>p.adj</b> | <b>p.adj.signif</b> |
|----|--------------|------------|---------------|---------------|-----------|-----------|--------------|---------------------|
| 1  | Acomys       | score      | control       | dpi.004       | 15        | 15        | 0.584        | ns                  |
| 2  | Acomys       | score      | control       | dpi.014       | 15        | 15        | 0.466        | ns                  |
| 3  | Acomys       | score      | control       | dpi.042       | 15        | 15        | 0.291        | ns                  |
| 4  | Acomys       | score      | control       | dpi.100       | 15        | 15        | 0.198        | ns                  |
| 5  | Acomys       | score      | dpi.004       | dpi.014       | 15        | 15        | 1            | ns                  |
| 6  | Acomys       | score      | dpi.004       | dpi.042       | 15        | 15        | 1            | ns                  |
| 7  | Acomys       | score      | dpi.004       | dpi.100       | 15        | 15        | 1            | ns                  |
| 8  | Acomys       | score      | dpi.014       | dpi.042       | 15        | 15        | 1            | ns                  |
| 9  | Acomys       | score      | dpi.014       | dpi.100       | 15        | 15        | 1            | ns                  |
| 10 | Acomys       | score      | dpi.042       | dpi.100       | 15        | 15        | 1            | ns                  |
| 11 | Mus          | score      | control       | dpi.004       | 14        | 14        | 1            | ns                  |
| 12 | Mus          | score      | control       | dpi.014       | 14        | 14        | 1            | ns                  |
| 13 | Mus          | score      | control       | dpi.042       | 14        | 14        | 1            | ns                  |
| 14 | Mus          | score      | control       | dpi.100       | 14        | 14        | 1            | ns                  |
| 15 | Mus          | score      | dpi.004       | dpi.014       | 14        | 14        | 1            | ns                  |
| 16 | Mus          | score      | dpi.004       | dpi.042       | 14        | 14        | 1            | ns                  |
| 17 | Mus          | score      | dpi.004       | dpi.100       | 14        | 14        | 1            | ns                  |
| 18 | Mus          | score      | dpi.014       | dpi.042       | 14        | 14        | 1            | ns                  |
| 19 | Mus          | score      | dpi.014       | dpi.100       | 14        | 14        | 1            | ns                  |
| 20 | Mus          | score      | dpi.042       | dpi.100       | 14        | 14        | 1            | ns                  |

**Supplementary Figure 2g (Q duration)**

Two-way mixed ANOVA result

|   | <b>Effect</b> | <b>DFn</b> | <b>DFd</b> | <b>F</b> | <b>p</b> | <b>p&lt;.05</b> | <b>ges</b> |
|---|---------------|------------|------------|----------|----------|-----------------|------------|
| 1 | group         | 1          | 6          | 8.252    | 0.028    | *               | 0.099      |
| 2 | time          | 4          | 24         | 0.489    | 0.744    |                 | 0.07       |
| 3 | group:time    | 4          | 24         | 0.649    | 0.633    |                 | 0.091      |

Simple pairwise comparison (between groups)

|   | <b>time</b> | <b>.y.</b> | <b>group1</b> | <b>group2</b> | <b>n1</b> | <b>n2</b> | <b>p</b> | <b>p.signif</b> | <b>p.adj</b> | <b>p.adj.signif</b> |
|---|-------------|------------|---------------|---------------|-----------|-----------|----------|-----------------|--------------|---------------------|
| 1 | control     | score      | Acomys        | Mus           | 15        | 14        | 0.00018  | ***             | 0.00018      | ***                 |
| 2 | dpi.004     | score      | Acomys        | Mus           | 15        | 14        | 0.742    | ns              | 0.742        | ns                  |
| 3 | dpi.014     | score      | Acomys        | Mus           | 15        | 14        | 0.0312   | *               | 0.0312       | *                   |
| 4 | dpi.042     | score      | Acomys        | Mus           | 15        | 14        | 0.213    | ns              | 0.213        | ns                  |
| 5 | dpi.100     | score      | Acomys        | Mus           | 15        | 14        | 0.23     | ns              | 0.23         | ns                  |

Simple pairwise comparison (within groups)

|    | <b>group</b> | <b>.y.</b> | <b>group1</b> | <b>group2</b> | <b>n1</b> | <b>n2</b> | <b>p.adj</b> | <b>p.adj.signif</b> |
|----|--------------|------------|---------------|---------------|-----------|-----------|--------------|---------------------|
| 1  | Acomys       | score      | control       | dpi.004       | 15        | 15        | 1            | ns                  |
| 2  | Acomys       | score      | control       | dpi.014       | 15        | 15        | 1            | ns                  |
| 3  | Acomys       | score      | control       | dpi.042       | 15        | 15        | 1            | ns                  |
| 4  | Acomys       | score      | control       | dpi.100       | 15        | 15        | 1            | ns                  |
| 5  | Acomys       | score      | dpi.004       | dpi.014       | 15        | 15        | 1            | ns                  |
| 6  | Acomys       | score      | dpi.004       | dpi.042       | 15        | 15        | 1            | ns                  |
| 7  | Acomys       | score      | dpi.004       | dpi.100       | 15        | 15        | 1            | ns                  |
| 8  | Acomys       | score      | dpi.014       | dpi.042       | 15        | 15        | 1            | ns                  |
| 9  | Acomys       | score      | dpi.014       | dpi.100       | 15        | 15        | 1            | ns                  |
| 10 | Acomys       | score      | dpi.042       | dpi.100       | 15        | 15        | 1            | ns                  |
| 11 | Mus          | score      | control       | dpi.004       | 14        | 14        | 1            | ns                  |
| 12 | Mus          | score      | control       | dpi.014       | 14        | 14        | 1            | ns                  |
| 13 | Mus          | score      | control       | dpi.042       | 14        | 14        | 1            | ns                  |
| 14 | Mus          | score      | control       | dpi.100       | 14        | 14        | 1            | ns                  |
| 15 | Mus          | score      | dpi.004       | dpi.014       | 14        | 14        | 1            | ns                  |
| 16 | Mus          | score      | dpi.004       | dpi.042       | 14        | 14        | 1            | ns                  |
| 17 | Mus          | score      | dpi.004       | dpi.100       | 14        | 14        | 1            | ns                  |
| 18 | Mus          | score      | dpi.014       | dpi.042       | 14        | 14        | 1            | ns                  |
| 19 | Mus          | score      | dpi.014       | dpi.100       | 14        | 14        | 1            | ns                  |
| 20 | Mus          | score      | dpi.042       | dpi.100       | 14        | 14        | 1            | ns                  |



**Supplementary Figure 2g (R amplitude)**

Two-way mixed ANOVA result

|   | <b>Effect</b> | <b>DFn</b> | <b>DFd</b> | <b>F</b> | <b>p</b> | <b>p&lt;.05</b> | <b>ges</b> |
|---|---------------|------------|------------|----------|----------|-----------------|------------|
| 1 | group         | 1          | 6          | 1.341    | 0.291    |                 | 0.049      |
| 2 | time          | 4          | 24         | 3.241    | 0.029    | *               | 0.294      |
| 3 | group:time    | 4          | 24         | 1.464    | 0.244    |                 | 0.158      |

Simple pairwise comparison (between groups)

|   | <b>time</b> | <b>.y.</b> | <b>group1</b> | <b>group2</b> | <b>n1</b> | <b>n2</b> | <b>p</b> | <b>p.signif</b> | <b>p.adj</b> | <b>p.adj.signif</b> |
|---|-------------|------------|---------------|---------------|-----------|-----------|----------|-----------------|--------------|---------------------|
| 1 | control     | score      | Acomys        | Mus           | 15        | 14        | 0.125    | ns              | 0.125        | ns                  |
| 2 | dpi.004     | score      | Acomys        | Mus           | 15        | 14        | 0.0647   | ns              | 0.0647       | ns                  |
| 3 | dpi.014     | score      | Acomys        | Mus           | 15        | 14        | 0.975    | ns              | 0.975        | ns                  |
| 4 | dpi.042     | score      | Acomys        | Mus           | 15        | 14        | 0.649    | ns              | 0.649        | ns                  |
| 5 | dpi.100     | score      | Acomys        | Mus           | 15        | 14        | 0.814    | ns              | 0.814        | ns                  |

Simple pairwise comparison (within groups)

|    | <b>group</b> | <b>.y.</b> | <b>group1</b> | <b>group2</b> | <b>n1</b> | <b>n2</b> | <b>p.adj</b> | <b>p.adj.signif</b> |
|----|--------------|------------|---------------|---------------|-----------|-----------|--------------|---------------------|
| 1  | Acomys       | score      | control       | dpi.004       | 15        | 15        | 1            | ns                  |
| 2  | Acomys       | score      | control       | dpi.014       | 15        | 15        | 1            | ns                  |
| 3  | Acomys       | score      | control       | dpi.042       | 15        | 15        | 1            | ns                  |
| 4  | Acomys       | score      | control       | dpi.100       | 15        | 15        | 1            | ns                  |
| 5  | Acomys       | score      | dpi.004       | dpi.014       | 15        | 15        | 1            | ns                  |
| 6  | Acomys       | score      | dpi.004       | dpi.042       | 15        | 15        | 1            | ns                  |
| 7  | Acomys       | score      | dpi.004       | dpi.100       | 15        | 15        | 1            | ns                  |
| 8  | Acomys       | score      | dpi.014       | dpi.042       | 15        | 15        | 0.413        | ns                  |
| 9  | Acomys       | score      | dpi.014       | dpi.100       | 15        | 15        | 1            | ns                  |
| 10 | Acomys       | score      | dpi.042       | dpi.100       | 15        | 15        | 1            | ns                  |
| 11 | Mus          | score      | control       | dpi.004       | 14        | 14        | 0.416        | ns                  |
| 12 | Mus          | score      | control       | dpi.014       | 14        | 14        | 1            | ns                  |
| 13 | Mus          | score      | control       | dpi.042       | 14        | 14        | 1            | ns                  |
| 14 | Mus          | score      | control       | dpi.100       | 14        | 14        | 1            | ns                  |
| 15 | Mus          | score      | dpi.004       | dpi.014       | 14        | 14        | 0.053        | ns                  |
| 16 | Mus          | score      | dpi.004       | dpi.042       | 14        | 14        | 1            | ns                  |
| 17 | Mus          | score      | dpi.004       | dpi.100       | 14        | 14        | 0.475        | ns                  |
| 18 | Mus          | score      | dpi.014       | dpi.042       | 14        | 14        | 1            | ns                  |
| 19 | Mus          | score      | dpi.014       | dpi.100       | 14        | 14        | 1            | ns                  |
| 20 | Mus          | score      | dpi.042       | dpi.100       | 14        | 14        | 1            | ns                  |

## Supplementary Figure 2g (R duration)

Two-way mixed ANOVA result

|   | <b>Effect</b> | <b>DFn</b> | <b>DFd</b> | <b>F</b> | <b>p</b> | <b>p&lt;.05</b> | <b>ges</b> |
|---|---------------|------------|------------|----------|----------|-----------------|------------|
| 1 | group         | 1          | 6          | 0.118    | 0.743    |                 | 0.005      |
| 2 | time          | 4          | 24         | 1.41     | 0.261    |                 | 0.146      |
| 3 | group:time    | 4          | 24         | 2.121    | 0.109    |                 | 0.205      |

Simple pairwise comparison (between groups)

|   | <b>time</b> | <b>.y.</b> | <b>group1</b> | <b>group2</b> | <b>n1</b> | <b>n2</b> | <b>p</b> | <b>p.signif</b> | <b>p.adj</b> | <b>p.adj.signif</b> |
|---|-------------|------------|---------------|---------------|-----------|-----------|----------|-----------------|--------------|---------------------|
| 1 | control     | score      | Acomys        | Mus           | 15        | 14        | 0.125    | ns              | 0.125        | ns                  |
| 2 | dpi.004     | score      | Acomys        | Mus           | 15        | 14        | 0.0647   | ns              | 0.0647       | ns                  |
| 3 | dpi.014     | score      | Acomys        | Mus           | 15        | 14        | 0.975    | ns              | 0.975        | ns                  |
| 4 | dpi.042     | score      | Acomys        | Mus           | 15        | 14        | 0.649    | ns              | 0.649        | ns                  |
| 5 | dpi.100     | score      | Acomys        | Mus           | 15        | 14        | 0.814    | ns              | 0.814        | ns                  |

Simple pairwise comparison (within groups)

|    | <b>group</b> | <b>.y.</b> | <b>group1</b> | <b>group2</b> | <b>n1</b> | <b>n2</b> | <b>p.adj</b> | <b>p.adj.signif</b> |
|----|--------------|------------|---------------|---------------|-----------|-----------|--------------|---------------------|
| 1  | Acomys       | score      | control       | dpi.004       | 15        | 15        | 1            | ns                  |
| 2  | Acomys       | score      | control       | dpi.014       | 15        | 15        | 1            | ns                  |
| 3  | Acomys       | score      | control       | dpi.042       | 15        | 15        | 1            | ns                  |
| 4  | Acomys       | score      | control       | dpi.100       | 15        | 15        | 1            | ns                  |
| 5  | Acomys       | score      | dpi.004       | dpi.014       | 15        | 15        | 1            | ns                  |
| 6  | Acomys       | score      | dpi.004       | dpi.042       | 15        | 15        | 1            | ns                  |
| 7  | Acomys       | score      | dpi.004       | dpi.100       | 15        | 15        | 1            | ns                  |
| 8  | Acomys       | score      | dpi.014       | dpi.042       | 15        | 15        | 1            | ns                  |
| 9  | Acomys       | score      | dpi.014       | dpi.100       | 15        | 15        | 1            | ns                  |
| 10 | Acomys       | score      | dpi.042       | dpi.100       | 15        | 15        | 1            | ns                  |
| 11 | Mus          | score      | control       | dpi.004       | 14        | 14        | 1            | ns                  |
| 12 | Mus          | score      | control       | dpi.014       | 14        | 14        | 1            | ns                  |
| 13 | Mus          | score      | control       | dpi.042       | 14        | 14        | 1            | ns                  |
| 14 | Mus          | score      | control       | dpi.100       | 14        | 14        | 1            | ns                  |
| 15 | Mus          | score      | dpi.004       | dpi.014       | 14        | 14        | 1            | ns                  |
| 16 | Mus          | score      | dpi.004       | dpi.042       | 14        | 14        | 1            | ns                  |
| 17 | Mus          | score      | dpi.004       | dpi.100       | 14        | 14        | 0.726        | ns                  |
| 18 | Mus          | score      | dpi.014       | dpi.042       | 14        | 14        | 1            | ns                  |
| 19 | Mus          | score      | dpi.014       | dpi.100       | 14        | 14        | 1            | ns                  |
| 20 | Mus          | score      | dpi.042       | dpi.100       | 14        | 14        | 0.794        | ns                  |

**Supplementary Figure 2g (S amplitude)**

Two-way mixed ANOVA result

|   | <b>Effect</b> | <b>DFn</b> | <b>DFd</b> | <b>F</b> | <b>p</b> | <b>p&lt;.05</b> | <b>ges</b> |
|---|---------------|------------|------------|----------|----------|-----------------|------------|
| 1 | group         | 1          | 6          | 74.858   | 0.00013  | *               | 0.818      |
| 2 | time          | 2.31       | 13.85      | 1.318    | 0.303    |                 | 0.123      |
| 3 | group:time    | 2.31       | 13.85      | 1.032    | 0.392    |                 | 0.099      |

Simple pairwise comparison (between groups)

|   | <b>time</b> | <b>.y.</b> | <b>group1</b> | <b>group2</b> | <b>n1</b> | <b>n2</b> | <b>p</b> | <b>p.signif</b> | <b>p.adj</b> | <b>p.adj.signif</b> |
|---|-------------|------------|---------------|---------------|-----------|-----------|----------|-----------------|--------------|---------------------|
| 1 | control     | score      | Acomys        | Mus           | 15        | 14        | 1.27E-09 | ****            | 1.27E-09     | ****                |
| 2 | dpi.004     | score      | Acomys        | Mus           | 15        | 14        | 0.00042  | ***             | 0.00042      | ***                 |
| 3 | dpi.014     | score      | Acomys        | Mus           | 15        | 14        | 0.00189  | **              | 0.00189      | **                  |
| 4 | dpi.042     | score      | Acomys        | Mus           | 15        | 14        | 0.00047  | ***             | 0.00047      | ***                 |
| 5 | dpi.100     | score      | Acomys        | Mus           | 15        | 14        | 0.00673  | **              | 0.00673      | **                  |

Simple pairwise comparison (within groups)

|    | <b>group</b> | <b>.y.</b> | <b>group1</b> | <b>group2</b> | <b>n1</b> | <b>n2</b> | <b>p.adj</b> | <b>p.adj.signif</b> |
|----|--------------|------------|---------------|---------------|-----------|-----------|--------------|---------------------|
| 1  | Acomys       | score      | control       | dpi.004       | 15        | 15        | 1            | ns                  |
| 2  | Acomys       | score      | control       | dpi.014       | 15        | 15        | 1            | ns                  |
| 3  | Acomys       | score      | control       | dpi.042       | 15        | 15        | 1            | ns                  |
| 4  | Acomys       | score      | control       | dpi.100       | 15        | 15        | 1            | ns                  |
| 5  | Acomys       | score      | dpi.004       | dpi.014       | 15        | 15        | 1            | ns                  |
| 6  | Acomys       | score      | dpi.004       | dpi.042       | 15        | 15        | 1            | ns                  |
| 7  | Acomys       | score      | dpi.004       | dpi.100       | 15        | 15        | 1            | ns                  |
| 8  | Acomys       | score      | dpi.014       | dpi.042       | 15        | 15        | 1            | ns                  |
| 9  | Acomys       | score      | dpi.014       | dpi.100       | 15        | 15        | 0.225        | ns                  |
| 10 | Acomys       | score      | dpi.042       | dpi.100       | 15        | 15        | 0.032        | *                   |
| 11 | Mus          | score      | control       | dpi.004       | 14        | 14        | 1            | ns                  |
| 12 | Mus          | score      | control       | dpi.014       | 14        | 14        | 0.336        | ns                  |
| 13 | Mus          | score      | control       | dpi.042       | 14        | 14        | 1            | ns                  |
| 14 | Mus          | score      | control       | dpi.100       | 14        | 14        | 1            | ns                  |
| 15 | Mus          | score      | dpi.004       | dpi.014       | 14        | 14        | 1            | ns                  |
| 16 | Mus          | score      | dpi.004       | dpi.042       | 14        | 14        | 1            | ns                  |
| 17 | Mus          | score      | dpi.004       | dpi.100       | 14        | 14        | 1            | ns                  |
| 18 | Mus          | score      | dpi.014       | dpi.042       | 14        | 14        | 1            | ns                  |
| 19 | Mus          | score      | dpi.014       | dpi.100       | 14        | 14        | 1            | ns                  |
| 20 | Mus          | score      | dpi.042       | dpi.100       | 14        | 14        | 1            | ns                  |

**Supplementary Figure 2g (S duration)**

Two-way mixed ANOVA result

|   | <b>Effect</b> | <b>DFn</b> | <b>DFd</b> | <b>F</b> | <b>p</b> | <b>p&lt;.05</b> | <b>ges</b> |
|---|---------------|------------|------------|----------|----------|-----------------|------------|
| 1 | group         | 1          | 6          | 1.385    | 0.284    |                 | 0.009      |
| 2 | time          | 4          | 24         | 0.295    | 0.878    |                 | 0.045      |
| 3 | group:time    | 4          | 24         | 1.29     | 0.302    |                 | 0.171      |

Simple pairwise comparison (between groups)

|   | <b>time</b> | <b>.y.</b> | <b>group1</b> | <b>group2</b> | <b>n1</b> | <b>n2</b> | <b>p</b> | <b>p.signif</b> | <b>p.adj</b> | <b>p.adj.signif</b> |
|---|-------------|------------|---------------|---------------|-----------|-----------|----------|-----------------|--------------|---------------------|
| 1 | control     | score      | Acomys        | Mus           | 15        | 14        | 0.624    | ns              | 0.624        | ns                  |
| 2 | dpi.004     | score      | Acomys        | Mus           | 15        | 14        | 0.127    | ns              | 0.127        | ns                  |
| 3 | dpi.014     | score      | Acomys        | Mus           | 15        | 14        | 0.289    | ns              | 0.289        | ns                  |
| 4 | dpi.042     | score      | Acomys        | Mus           | 15        | 14        | 0.655    | ns              | 0.655        | ns                  |
| 5 | dpi.100     | score      | Acomys        | Mus           | 15        | 14        | 0.915    | ns              | 0.915        | ns                  |

Simple pairwise comparison (within groups)

|    | <b>group</b> | <b>.y.</b> | <b>group1</b> | <b>group2</b> | <b>n1</b> | <b>n2</b> | <b>p.adj</b> | <b>p.adj.signif</b> |
|----|--------------|------------|---------------|---------------|-----------|-----------|--------------|---------------------|
| 1  | Acomys       | score      | control       | dpi.004       | 15        | 15        | 1            | ns                  |
| 2  | Acomys       | score      | control       | dpi.014       | 15        | 15        | 1            | ns                  |
| 3  | Acomys       | score      | control       | dpi.042       | 15        | 15        | 0.69         | ns                  |
| 4  | Acomys       | score      | control       | dpi.100       | 15        | 15        | 1            | ns                  |
| 5  | Acomys       | score      | dpi.004       | dpi.014       | 15        | 15        | 1            | ns                  |
| 6  | Acomys       | score      | dpi.004       | dpi.042       | 15        | 15        | 1            | ns                  |
| 7  | Acomys       | score      | dpi.004       | dpi.100       | 15        | 15        | 1            | ns                  |
| 8  | Acomys       | score      | dpi.014       | dpi.042       | 15        | 15        | 1            | ns                  |
| 9  | Acomys       | score      | dpi.014       | dpi.100       | 15        | 15        | 1            | ns                  |
| 10 | Acomys       | score      | dpi.042       | dpi.100       | 15        | 15        | 1            | ns                  |
| 11 | Mus          | score      | control       | dpi.004       | 14        | 14        | 0.257        | ns                  |
| 12 | Mus          | score      | control       | dpi.014       | 14        | 14        | 1            | ns                  |
| 13 | Mus          | score      | control       | dpi.042       | 14        | 14        | 1            | ns                  |
| 14 | Mus          | score      | control       | dpi.100       | 14        | 14        | 1            | ns                  |
| 15 | Mus          | score      | dpi.004       | dpi.014       | 14        | 14        | 1            | ns                  |
| 16 | Mus          | score      | dpi.004       | dpi.042       | 14        | 14        | 1            | ns                  |
| 17 | Mus          | score      | dpi.004       | dpi.100       | 14        | 14        | 1            | ns                  |
| 18 | Mus          | score      | dpi.014       | dpi.042       | 14        | 14        | 1            | ns                  |
| 19 | Mus          | score      | dpi.014       | dpi.100       | 14        | 14        | 1            | ns                  |
| 20 | Mus          | score      | dpi.042       | dpi.100       | 14        | 14        | 1            | ns                  |

### Supplementary Figure 3a (PDGFRB immuno)

Two-way mixed ANOVA result

|   | <b>Effect</b> | <b>DFn</b> | <b>DFd</b> | <b>F</b> | <b>p</b> | <b>p&lt;.05</b> | <b>ges</b> |
|---|---------------|------------|------------|----------|----------|-----------------|------------|
| 1 | group         | 1          | 5          | 15.13    | 0.012    | *               | 0.238      |
| 2 | time          | 1.61       | 8.04       | 38.241   | 0.00011  | *               | 0.873      |
| 3 | group:time    | 1.61       | 8.04       | 1.242    | 0.327    |                 | 0.182      |

Simple pairwise comparison (between groups)

|   | <b>time</b> | <b>.y.</b> | <b>group1</b> | <b>group2</b> | <b>n1</b> | <b>n2</b> | <b>p</b> | <b>p.signif</b> | <b>p.adj</b> | <b>p.adj.signif</b> |
|---|-------------|------------|---------------|---------------|-----------|-----------|----------|-----------------|--------------|---------------------|
| 1 | dpi.004     | score      | Acomys        | Mus           | 5         | 4         | 0.291    | ns              | 0.291        | ns                  |
| 2 | dpi.014     | score      | Acomys        | Mus           | 5         | 4         | 0.17     | ns              | 0.17         | ns                  |
| 3 | dpi.100     | score      | Acomys        | Mus           | 5         | 4         | 0.0386   | *               | 0.0386       | *                   |

Simple pairwise comparison (within groups)

|    | <b>group</b> | <b>.y.</b> | <b>group1</b> | <b>group2</b> | <b>n1</b> | <b>n2</b> | <b>p.adj</b> | <b>p.adj.signif</b> |
|----|--------------|------------|---------------|---------------|-----------|-----------|--------------|---------------------|
| 1  | Acomys       | score      | control       | dpi.004       | 5         | 5         | 0.154        | ns                  |
| 2  | Acomys       | score      | control       | dpi.014       | 5         | 5         | 0.034        | *                   |
| 3  | Acomys       | score      | control       | dpi.100       | 5         | 5         | 0.011        | *                   |
| 4  | Acomys       | score      | dpi.004       | dpi.014       | 5         | 5         | 0.4          | ns                  |
| 5  | Acomys       | score      | dpi.004       | dpi.100       | 5         | 5         | 0.484        | ns                  |
| 6  | Acomys       | score      | dpi.014       | dpi.100       | 5         | 5         | 1            | ns                  |
| 7  | Mus          | score      | control       | dpi.004       | 4         | 4         | 0.00091      | ***                 |
| 8  | Mus          | score      | control       | dpi.014       | 4         | 4         | 0.011        | *                   |
| 9  | Mus          | score      | control       | dpi.100       | 4         | 4         | 0.009        | **                  |
| 10 | Mus          | score      | dpi.004       | dpi.014       | 4         | 4         | 0.086        | ns                  |
| 11 | Mus          | score      | dpi.004       | dpi.100       | 4         | 4         | 0.011        | *                   |
| 12 | Mus          | score      | dpi.014       | dpi.100       | 4         | 4         | 1            | ns                  |

## Supplementary Figure 4b (Nuclei numbers)

Two-way mixed ANOVA result

|   | Effect     | DFn | DFd | F       | p        | p<.05 | ges   |
|---|------------|-----|-----|---------|----------|-------|-------|
| 1 | group      | 1   | 5   | 13.757  | 0.014    | *     | 0.143 |
| 2 | time       | 4   | 20  | 138.102 | 2.89E-14 | *     | 0.963 |
| 3 | group:time | 4   | 20  | 0.435   | 0.782    |       | 0.076 |

Simple pairwise comparison (between groups)

|   | time    | .y.   | group1 | group2 | n1 | n2 | p        | p.signif | p.adj    | p.adj.signif |
|---|---------|-------|--------|--------|----|----|----------|----------|----------|--------------|
| 1 | control | score | Acomys | Mus    | 10 | 10 | 3.20E-10 | ****     | 3.20E-10 | ****         |
| 2 | dpi.014 | score | Acomys | Mus    | 10 | 10 | 8.23E-10 | ****     | 8.23E-10 | ****         |
| 3 | dpi.042 | score | Acomys | Mus    | 10 | 10 | 3.99E-07 | ****     | 3.99E-07 | ****         |
| 4 | dpi.100 | score | Acomys | Mus    | 10 | 10 | 5.27E-07 | ****     | 5.27E-07 | ****         |

Simple pairwise comparison (within groups)

|    | group  | .y.   | group1  | group2  | n1 | n2 | p.adj   | p.adj.signif |
|----|--------|-------|---------|---------|----|----|---------|--------------|
| 1  | Acomys | score | control | dpi.014 | 10 | 10 | 0.035   | *            |
| 2  | Acomys | score | control | dpi.042 | 10 | 10 | 0.001   | **           |
| 3  | Acomys | score | control | dpi.100 | 10 | 10 | 0.001   | **           |
| 4  | Acomys | score | dpi.014 | dpi.042 | 10 | 10 | 0.024   | *            |
| 5  | Acomys | score | dpi.014 | dpi.100 | 10 | 10 | 0.395   | ns           |
| 6  | Acomys | score | dpi.042 | dpi.100 | 10 | 10 | 1       | ns           |
| 7  | Mus    | score | control | dpi.014 | 10 | 10 | 0.00059 | ***          |
| 8  | Mus    | score | control | dpi.042 | 10 | 10 | 0.00011 | ***          |
| 9  | Mus    | score | control | dpi.100 | 10 | 10 | 0.00067 | ***          |
| 10 | Mus    | score | dpi.014 | dpi.042 | 10 | 10 | 0.073   | ns           |
| 11 | Mus    | score | dpi.014 | dpi.100 | 10 | 10 | 0.29    | ns           |
| 12 | Mus    | score | dpi.042 | dpi.100 | 10 | 10 | 1       | ns           |

### Supplementary Figure 4c (Global proliferation)

Two-way mixed ANOVA result

|   | Effect     | DFn  | DFd  | F     | p        | p<.05 | ges   |
|---|------------|------|------|-------|----------|-------|-------|
| 1 | group      | 1    | 6    | 2.348 | 0.176    |       | 0.082 |
| 2 | time       | 1.16 | 6.98 | 61.21 | 8.42E-05 | *     | 0.887 |
| 3 | group:time | 1.16 | 6.98 | 1.146 | 0.332    |       | 0.128 |

Simple pairwise comparison (between groups)

|   | time    | .y.   | group1 | group2 | n1 | n2 | p      | p.signif | p.adj  | p.adj.signif |
|---|---------|-------|--------|--------|----|----|--------|----------|--------|--------------|
| 1 | dpi.004 | score | Acomys | Mus    | 5  | 4  | 0.0975 | ns       | 0.0975 | ns           |
| 2 | dpi.014 | score | Acomys | Mus    | 5  | 4  | 0.328  | ns       | 0.328  | ns           |
| 3 | dpi.042 | score | Acomys | Mus    | 5  | 4  | 0.768  | ns       | 0.768  | ns           |
| 4 | dpi.100 | score | Acomys | Mus    | 5  | 4  | 0.373  | ns       | 0.373  | ns           |

Simple pairwise comparison (within groups)

|    | group  | .y.   | group1  | group2  | n1 | n2 | p.adj   | p.adj.signif |
|----|--------|-------|---------|---------|----|----|---------|--------------|
| 1  | Acomys | score | control | dpi.004 | 5  | 5  | 0.004   | **           |
| 2  | Acomys | score | control | dpi.014 | 5  | 5  | 0.692   | ns           |
| 3  | Acomys | score | control | dpi.042 | 5  | 5  | 0.021   | *            |
| 4  | Acomys | score | control | dpi.100 | 5  | 5  | 0.332   | ns           |
| 5  | Acomys | score | dpi.004 | dpi.014 | 5  | 5  | 0.265   | ns           |
| 6  | Acomys | score | dpi.004 | dpi.042 | 5  | 5  | 0.007   | **           |
| 7  | Acomys | score | dpi.004 | dpi.100 | 5  | 5  | 0.018   | *            |
| 8  | Acomys | score | dpi.014 | dpi.042 | 5  | 5  | 1       | ns           |
| 9  | Acomys | score | dpi.014 | dpi.100 | 5  | 5  | 1       | ns           |
| 10 | Acomys | score | dpi.042 | dpi.100 | 5  | 5  | 1       | ns           |
| 11 | Mus    | score | control | dpi.004 | 4  | 4  | 0.00056 | ***          |
| 12 | Mus    | score | control | dpi.014 | 4  | 4  | 0.149   | ns           |
| 13 | Mus    | score | control | dpi.042 | 4  | 4  | 0.185   | ns           |
| 14 | Mus    | score | control | dpi.100 | 4  | 4  | 0.201   | ns           |
| 15 | Mus    | score | dpi.004 | dpi.014 | 4  | 4  | 0.044   | *            |
| 16 | Mus    | score | dpi.004 | dpi.042 | 4  | 4  | 0.004   | **           |
| 17 | Mus    | score | dpi.004 | dpi.100 | 4  | 4  | 0.003   | **           |
| 18 | Mus    | score | dpi.014 | dpi.042 | 4  | 4  | 0.311   | ns           |
| 19 | Mus    | score | dpi.014 | dpi.100 | 4  | 4  | 0.269   | ns           |
| 20 | Mus    | score | dpi.042 | dpi.100 | 4  | 4  | 0.898   | ns           |

### Supplementary Figure 5d (MLC2v pHis immuno)

Two-way mixed ANOVA result

|   | <b>Effect</b> | <b>DFn</b> | <b>DFd</b> | <b>F</b> | <b>p</b> | <b>p&lt;.05</b> | <b>ges</b> |
|---|---------------|------------|------------|----------|----------|-----------------|------------|
| 1 | group         | 1          | 6          | 19.7     | 0.004    | *               | 0.535      |
| 2 | time          | 1.06       | 6.35       | 26.2     | 0.002    | *               | 0.739      |
| 3 | group:time    | 1.06       | 6.35       | 9.727    | 0.018    | *               | 0.513      |

Simple pairwise comparison (between groups)

|   | <b>time</b> | <b>.y.</b> | <b>group1</b> | <b>group2</b> | <b>n1</b> | <b>n2</b> | <b>p</b> | <b>p.signif</b> | <b>p.adj</b> | <b>p.adj.signif</b> |
|---|-------------|------------|---------------|---------------|-----------|-----------|----------|-----------------|--------------|---------------------|
| 1 | control     | score      | Acomys        | Mus           | 5         | 4         | 0.946    | ns              | 0.946        | ns                  |
| 2 | dpi.014     | score      | Acomys        | Mus           | 5         | 4         | 0.00465  | **              | 0.00465      | **                  |
| 3 | dpi.100     | score      | Acomys        | Mus           | 5         | 4         | 0.0322   | *               | 0.0322       | *                   |

Simple pairwise comparison (within groups)

|   | <b>group</b> | <b>.y.</b> | <b>group1</b> | <b>group2</b> | <b>n1</b> | <b>n2</b> | <b>p.adj</b> | <b>p.adj.signif</b> |
|---|--------------|------------|---------------|---------------|-----------|-----------|--------------|---------------------|
| 1 | Acomys       | score      | control       | dpi.014       | 5         | 5         | 0.049        | *                   |
| 2 | Acomys       | score      | control       | dpi.100       | 5         | 5         | 0.057        | ns                  |
| 3 | Acomys       | score      | dpi.014       | dpi.100       | 5         | 5         | 0.127        | ns                  |
| 4 | Mus          | score      | control       | dpi.014       | 4         | 4         | 0.001        | **                  |
| 5 | Mus          | score      | control       | dpi.100       | 4         | 4         | 0.528        | ns                  |
| 6 | Mus          | score      | dpi.014       | dpi.100       | 4         | 4         | 0.016        | *                   |



**Supplementary Figure 6a (IsoB4 EdU immuno)**

Two-way mixed ANOVA result

|   | <b>Effect</b> | <b>DFn</b> | <b>DFd</b> | <b>F</b> | <b>p</b> | <b>p&lt;.05</b> | <b>ges</b> |
|---|---------------|------------|------------|----------|----------|-----------------|------------|
| 1 | group         | 1          | 6          | 14.384   | 0.009    | *               | 0.222      |
| 2 | time          | 4          | 24         | 30.347   | 4.51E-09 | *               | 0.817      |
| 3 | group:time    | 4          | 24         | 3.529    | 0.021    | *               | 0.341      |

Simple pairwise comparison (between groups)

|   | <b>time</b> | <b>.y.</b> | <b>group1</b> | <b>group2</b> | <b>n1</b> | <b>n2</b> | <b>p</b> | <b>p.signif</b> | <b>p.adj</b> | <b>p.adj.signif</b> |
|---|-------------|------------|---------------|---------------|-----------|-----------|----------|-----------------|--------------|---------------------|
| 1 | dpi.004     | score      | Acomys        | Mus           | 5         | 4         | 0.572    | ns              | 0.572        | ns                  |
| 2 | dpi.014     | score      | Acomys        | Mus           | 5         | 4         | 0.0297   | *               | 0.0297       | *                   |
| 3 | dpi.042     | score      | Acomys        | Mus           | 5         | 4         | 0.0574   | ns              | 0.0574       | ns                  |
| 4 | dpi.100     | score      | Acomys        | Mus           | 5         | 4         | 0.0316   | *               | 0.0316       | *                   |

Simple pairwise comparison (within groups)

|    | <b>group</b> | <b>.y.</b> | <b>group1</b> | <b>group2</b> | <b>n1</b> | <b>n2</b> | <b>p.adj</b> | <b>p.adj.signif</b> |
|----|--------------|------------|---------------|---------------|-----------|-----------|--------------|---------------------|
| 1  | Acomys       | score      | control       | dpi.004       | 5         | 5         | 0.016        | *                   |
| 2  | Acomys       | score      | control       | dpi.014       | 5         | 5         | 0.064        | ns                  |
| 3  | Acomys       | score      | control       | dpi.042       | 5         | 5         | 0.071        | ns                  |
| 4  | Acomys       | score      | control       | dpi.100       | 5         | 5         | 0.317        | ns                  |
| 5  | Acomys       | score      | dpi.004       | dpi.014       | 5         | 5         | 1            | ns                  |
| 6  | Acomys       | score      | dpi.004       | dpi.042       | 5         | 5         | 0.034        | *                   |
| 7  | Acomys       | score      | dpi.004       | dpi.100       | 5         | 5         | 0.928        | ns                  |
| 8  | Acomys       | score      | dpi.014       | dpi.042       | 5         | 5         | 0.304        | ns                  |
| 9  | Acomys       | score      | dpi.014       | dpi.100       | 5         | 5         | 0.693        | ns                  |
| 10 | Acomys       | score      | dpi.042       | dpi.100       | 5         | 5         | 1            | ns                  |
| 11 | Mus          | score      | control       | dpi.004       | 4         | 4         | 0.06         | ns                  |
| 12 | Mus          | score      | control       | dpi.014       | 4         | 4         | 0.917        | ns                  |
| 13 | Mus          | score      | control       | dpi.042       | 4         | 4         | 0.48         | ns                  |
| 14 | Mus          | score      | control       | dpi.100       | 4         | 4         | 1            | ns                  |
| 15 | Mus          | score      | dpi.004       | dpi.014       | 4         | 4         | 0.056        | ns                  |
| 16 | Mus          | score      | dpi.004       | dpi.042       | 4         | 4         | 0.238        | ns                  |
| 17 | Mus          | score      | dpi.004       | dpi.100       | 4         | 4         | 0.187        | ns                  |
| 18 | Mus          | score      | dpi.014       | dpi.042       | 4         | 4         | 1            | ns                  |
| 19 | Mus          | score      | dpi.014       | dpi.100       | 4         | 4         | 1            | ns                  |
| 20 | Mus          | score      | dpi.042       | dpi.100       | 4         | 4         | 0.565        | ns                  |

## Supplementary Figure 6b (IsoB4 pHis immuno)

Two-way mixed ANOVA result

|   | Effect     | DFn | DFd | F      | p        | p<.05 | ges   |
|---|------------|-----|-----|--------|----------|-------|-------|
| 1 | group      | 1   | 5   | 4.093  | 0.099    |       | 0.231 |
| 2 | time       | 4   | 20  | 15.737 | 5.70E-06 | *     | 0.666 |
| 3 | group:time | 4   | 20  | 2.12   | 0.116    |       | 0.211 |

Simple pairwise comparison (between groups)

|   | time    | .y.   | group1 | group2 | n1 | n2 | p      | p.signif | p.adj  | p.adj.signif |
|---|---------|-------|--------|--------|----|----|--------|----------|--------|--------------|
| 1 | dpi.004 | score | Acomys | Mus    | 5  | 4  | 0.085  | ns       | 0.085  | ns           |
| 2 | dpi.014 | score | Acomys | Mus    | 5  | 4  | 0.97   | ns       | 0.97   | ns           |
| 3 | dpi.042 | score | Acomys | Mus    | 5  | 4  | 0.0386 | *        | 0.0386 | *            |
| 4 | dpi.100 | score | Acomys | Mus    | 5  | 4  | 0.162  | ns       | 0.162  | ns           |

Simple pairwise comparison (within groups)

|    | group  | .y.   | group1  | group2  | n1 | n2 | p.adj   | p.adj.signif |
|----|--------|-------|---------|---------|----|----|---------|--------------|
| 1  | Acomys | score | control | dpi.004 | 5  | 5  | 0.283   | ns           |
| 2  | Acomys | score | control | dpi.014 | 5  | 5  | 0.00018 | ***          |
| 3  | Acomys | score | control | dpi.042 | 5  | 5  | 0.496   | ns           |
| 4  | Acomys | score | control | dpi.100 | 5  | 5  | 0.304   | ns           |
| 5  | Acomys | score | dpi.004 | dpi.014 | 5  | 5  | 0.183   | ns           |
| 6  | Acomys | score | dpi.004 | dpi.042 | 5  | 5  | 0.301   | ns           |
| 7  | Acomys | score | dpi.004 | dpi.100 | 5  | 5  | 0.563   | ns           |
| 8  | Acomys | score | dpi.014 | dpi.042 | 5  | 5  | 1       | ns           |
| 9  | Acomys | score | dpi.014 | dpi.100 | 5  | 5  | 1       | ns           |
| 10 | Acomys | score | dpi.042 | dpi.100 | 5  | 5  | 1       | ns           |
| 11 | Mus    | score | control | dpi.004 | 4  | 4  | 0.148   | ns           |
| 12 | Mus    | score | control | dpi.014 | 4  | 4  | 0.295   | ns           |
| 13 | Mus    | score | control | dpi.042 | 4  | 4  | 0.041   | *            |
| 14 | Mus    | score | control | dpi.100 | 4  | 4  | 1       | ns           |
| 15 | Mus    | score | dpi.004 | dpi.014 | 4  | 4  | 0.12    | ns           |
| 16 | Mus    | score | dpi.004 | dpi.042 | 4  | 4  | 0.196   | ns           |
| 17 | Mus    | score | dpi.004 | dpi.100 | 4  | 4  | 0.306   | ns           |
| 18 | Mus    | score | dpi.014 | dpi.042 | 4  | 4  | 0.676   | ns           |
| 19 | Mus    | score | dpi.014 | dpi.100 | 4  | 4  | 1       | ns           |
| 20 | Mus    | score | dpi.042 | dpi.100 | 4  | 4  | 1       | ns           |
